# Supplementary material for: An efficient and eco-friendly synthesis of 2-pyridones and functionalized azaxanthone frameworks via indium triflate catalyzed domino reaction
Source: Royal Society of Chemistry journal article supplement (doi:10.1039/c6gc03440c), 2017-01-01
Supplement: c6gc03440c1.pdf [file c6gc03440c1.pdf]

**An efficient and eco-friendly synthesis of 2-pyridones and functionalized azaxanthone frameworks *via* indium triflate catalyzed domino reaction**

N. Poomathi,<sup>\*a,b</sup> P. T. Perumal,<sup>a</sup> and S. Ramakrishna,<sup>b\*</sup>

<sup>a</sup> Organic Chemistry Division, CSIR-Central Leather Research Institute, Adyar, Chennai-6000 20, India.  
Fax: +91-44-24911589; E-mail: [ptperumal@gmail.com](mailto:ptperumal@gmail.com)

<sup>b</sup> Centre for Nanofibers and Nanotechnology, National University of Singapore, Singapore 117576.

E-mail: [seeram@nus.edu.sg](mailto:seeram@nus.edu.sg), Fax: +65-67730339

## TABLE OF CONTENTS

|     |                                                           |         |
|-----|-----------------------------------------------------------|---------|
| I.  | Experimental general.....                                 | S3-S12  |
| II. | Copy of $^1\text{H}$ and $^{13}\text{C}$ NMR spectra..... | S13-S84 |

## Experimental General:

All chemicals were purchased from Sigma Aldrich. All melting points are uncorrected.  $^1\text{H}$  and  $^{13}\text{C}$  NMR spectra were recorded in  $\text{CDCl}_3$  and  $\text{DMSO}-d_6$  using TMS as an internal standard on a Bruker avance spectrometer at 400 Mhz amd 100 MHz and JEOL spectrometer at 500 and 125 Mhz, respectively. Mass spectra were recorded using a JEOL GCMate-II–HR mass spectrometer. Analytical TLC was performed on precoated aluminium sheets of siliga gel G/UV-254 of 0.2 mm thickness (Merck, Germany).

## Starting materials

Starting materials **2** and **4** derivatives (Table 1 in manuscript) has been prepared according to the literature procedure.<sup>13c,d</sup>

**General procedure for the preparation of 2-pyridone and chrominopyridine derivatives:** A mixture of 3-formylchromone **1** (1 mmol), (Z)-N-methyl-1-(methyl-thio)-2-nitroethenamine/N,N'-dimethyl-2-nitro-ethene-1,1-diamine **2/4** (1 mmol), and indium triflate (2 mol %) in ethanol (3 mL) were charged in a 25 mL round bottomed flask and the mixture was heated at reflux. The resulting solution was stirred for 1-3 hrs. The consumption of the starting material was monitored by TLC. After completion of the reaction, the products (**3a-s**) was filtered and washed with ethanol, dried under vacuum and the products **5a-p** was purified by column chromatography to obtain pure products **3a-s** and **5a-p** in good yields (65-95 %). The identities of products **3a-s** and **5a-p** were confirmed by NMR and EI-HRMS, giving good agreement with the assigned structures.

## Synthetic transformation of products 3a:

A mixture of  $\gamma$ -nitro-2-pyridone **3a** (1 mmol) and stannous chloride dihydrate (7 equiv) in ethanol (3 mL) were charged in a 25 mL round bottomed flask and the mixture was heated at reflux. The resulting solution was stirred for 2 hrs. The consumption of the starting material was monitored by TLC. After completion of the reaction, the products was purified by column chromatography to obtain pure products **14** in good yield (82 %). The identities of products **14** was confirmed by NMR and EI-HRMS, giving good agreement with the assigned structures.

Isolated as yellow solid, 82%, mp: 188-190 °C,  $^1\text{H}$  NMR (400 MHz,  $\text{DMSO}-d_6$ )  $\delta_{\text{H}}$  10.20 (1H, s), 7.74 (1 H, d,  $J = 1.3$ ), 7.57 (1H, d,  $J = 1.8$ ), 7.39 (2H, dd,  $J = 16.8, 8.0$ ), 7.03 – 6.93 (2H, m), 3.72 (1H, s), 3.59 (3 H, s), 3.57 (1H, s) ppm.  $^{13}\text{C}$  NMR (100 MHz,  $\text{DMSO}-d_6$ )  $\delta_{\text{C}}$  192.73, 158.55, 156.44, 137.27, 132.98, 130.50, 130.26, 125.21, 119.55, 117.61, 117.23, 110.72, 38.43 ppm. EI-HRMS: Anal. Calcd for  $\text{C}_{13}\text{H}_{12}\text{N}_2\text{O}_3$ : 244.0848, Found: 244.0847

### **Catalyst recovery and reuse during the preparation of 2-pyridone 3a**

A mixture of 3-formylchromone **1** (1 equiv), (Z)-N-methyl-1-(methyl-thio)-2-nitroethenamine **2** (1 equiv), and indium triflate (2 mol %) in ethanol were charged in a 25 mL round bottomed flask and the mixture was heated at reflux. The resulting solution was stirred for 1 hr. The consumption of the starting material was monitored by TLC. After completion of the reaction, the products **3a** was filtered and washed with ethanol, dried under vacuum to obtain pure product **3a** as 88 % yield. The filtrate was evaporated to dryness by repeated codistillation with toluene and finally dried under vacuum at 95–100°C. The recovered catalyst is effective in subsequent experiments. It should be noted that the yields in second and even fifth run are comparable to that of the first run (Table 1).

**Table 1** Catalyst recovery and reuse during the preparation of 2-pyridone **3a**

| Run             | In(OTf) <sub>3</sub><br>Product (%) | Yield <sup>a,b,c</sup> (%) |
|-----------------|-------------------------------------|----------------------------|
| 1 <sup>st</sup> | 3a                                  | 88                         |
| 2 <sup>nd</sup> | 3a                                  | 86                         |
| 3 <sup>rd</sup> | 3a                                  | 84                         |
| 4 <sup>th</sup> | 3a                                  | 84                         |
| 5 <sup>th</sup> | 3a                                  | 80                         |

<sup>a</sup>The reaction was performed with 3-formylchromone **1** (1 equiv), NMSM **2** (1 equiv), In(OTf)<sub>3</sub> (2 mol %) and ethanol, at reflux,

<sup>b</sup>Reaction progress was followed by TLC analysis. <sup>c</sup>Yield of isolated products.

### **3a:5-(2-hydroxybenzoyl)-1-methyl-3-nitropyridin-2(1H)-one**

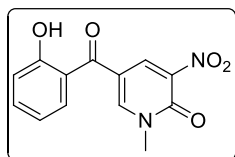

Isolated as yellow solid, 89%, mp: 219-221°C, <sup>1</sup>H NMR (400 MHz, DMSO-*d*<sub>6</sub>) δ 10.34 (s, 1H), 8.74 (s, 1H), 8.52 (d, *J* = 2.3 Hz, 1H), 7.51–7.22 (m, 2H), 7.07–6.67 (m, 2H), 3.62 (s, 3H) ppm. <sup>13</sup>C NMR (100 MHz, DMSO-*d*<sub>6</sub>) δ 190.19, 155.83, 154.05, 150.44, 137.66, 136.15, 133.39, 130.21, 124.11, 119.45, 116.77, 114.28,

38.62 ppm. EI-HRMS: Anal. Calcd for C<sub>13</sub> H<sub>10</sub> N<sub>2</sub>O<sub>5</sub>: 274.0590, Found: 274.0587

### **3b: 5-(5-chloro-2-hydroxybenzoyl)-1-methyl-3-nitropyridin-2(1H)-one**

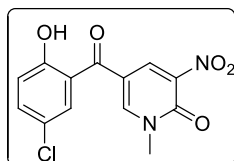

Isolated as yellow solid, 88 %, mp: 202-204 °C, <sup>1</sup>H NMR (400 MHz, DMSO-*d*<sub>6</sub>) δ 10.61 (s, 1H), 8.78 (d, *J* = 2.5 Hz, 1H), 8.56 (d, *J* = 2.5 Hz, 1H), 7.47 (dd, *J* = 8.8, 2.7 Hz, 1H), 7.38 (d, *J* = 2.7 Hz, 1H), 7.01 (d, *J* = 8.8 Hz, 1H), 3.65 (s, 3H) ppm. <sup>13</sup>C NMR (100 MHz, DMSO-*d*<sub>6</sub>) δ 193.94, 159.51, 159.32, 156.00, 142.56, 141.67, 137.80, 134.30, 131.31, 128.28, 123.82, 119.25, 43.85 ppm. EI-HRMS:

Anal. Calcd for C<sub>13</sub>H<sub>9</sub>ClN<sub>2</sub>O<sub>5</sub>: 308.0200, Found: 308.0199.

### **3c:5-(5-bromo-2-hydroxybenzoyl)-1-methyl-3-nitropyridin-2(1H)-one**

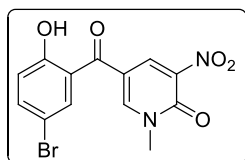

Isolated as yellow solid, 85 %, mp: 210-212 °C, <sup>1</sup>H NMR (400 MHz, DMSO-*d*<sub>6</sub>) δ 10.65 (s, 1H), 8.78 (d, *J* = 2.0 Hz, 1H), 8.57 (d, *J* = 2.1 Hz, 1H), 7.69–7.37 (m,

2H), 6.97 (d,  $J = 8.7$  Hz, 1H), 3.66 (s, 3H) ppm.  $^{13}\text{C}$  NMR (100 MHz, DMSO- $d_6$ )  $\delta$  193.85, 159.92, 159.31, 156.06, 142.60, 141.64, 140.63, 137.14, 131.86, 124.26, 119.25, 115.71, 43.86. EI-HRMS: Anal. Calcd for  $\text{C}_{13}\text{H}_9\text{BrN}_2\text{O}_5$ : 351.9695, Found: 351.9690.

### 3d:5-(5-fluoro-2-hydroxybenzoyl)-1-methyl-3-nitropyridin-2(1H)-one

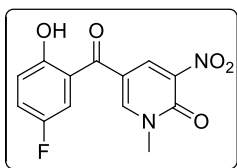

Isolated as yellow solid, 83 %, mp: 210-212 °C,  $^1\text{H}$  NMR (400 MHz DMSO- $d_6$ )  $\delta$  10.32 (s, 1H), 8.77 (d,  $J = 2.0$  Hz, 1H), 8.57 (d,  $J = 2.4$  Hz, 1H), 7.30 (td,  $J = 8.6$ , 3.2 Hz, 1H), 7.21 (dd,  $J = 8.6$ , 3.2 Hz, 1H), 7.00 (dd,  $J = 9.0$ , 4.4 Hz, 1H), 3.66 (s, 3H).  $^{13}\text{C}$  NMR (100 MHz, DMSO- $d_6$ )  $\delta$  194.09, 161.62, 159.32-159.27 (d,  $J = 4.10$  Hz), 157.06, 156.08, 142.66, 141.65, 130.24-130.17 (d,  $J = 6.70$  Hz), 125.16-124.93 (d,  $J = 23.75$  Hz), 123.40-123.32 (d,  $J = 8.70$  Hz), 121.08-120.84 (d,  $J = 24.69$  Hz), 119.21, 43.86.

HRMS: Anal. Calcd for  $\text{C}_{13}\text{H}_9\text{FN}_2\text{O}_5$ : 292.0495, Found: 292.0491.

### 3e:5-(4-fluoro-2-hydroxybenzoyl)-1-methyl-3-nitropyridin-2(1H)-one

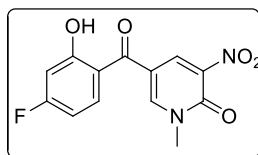

Isolated as yellow solid, 86 %, mp: 260-261 °C,  $^1\text{H}$  NMR (400 MHz, DMSO- $d_6$ )  $\delta$  8.77 (d,  $J = 2.3$  Hz, 1H), 8.58 (d,  $J = 2.4$  Hz, 1H), 7.50 (dd,  $J = 8.2$ , 7.2 Hz, 1H), 6.80 (ddd,  $J = 12.8$ , 9.5, 2.1 Hz, 2H), 3.66 (s, 3H).  $^{13}\text{C}$  NMR (100 MHz, DMSO- $d_6$ )  $\delta$  194.35, 171.37, 168.89, 163.37-163.25 (d,  $J = 13.62$  Hz), 159.31, 155.74, 142.75-142.69 (d,  $J = 5.68$  Hz), 141.56, 137.94-137.82 (d,  $J = 11.35$  Hz), 126.34-126.32 (d,  $J = 2.25$  Hz), 119.58, 112.15-108.71 (dd,  $J = 322.91$ , 23.01 Hz), 43.81 ppm. EI-HRMS: Anal. Calcd for  $\text{C}_{13}\text{H}_9\text{FN}_2\text{O}_5$ : 292.0495, Found: 292.0493.

### 3f:5-(3,5-dichloro-2-hydroxybenzoyl)-1-methyl-3-nitropyridin-2(1H)-one

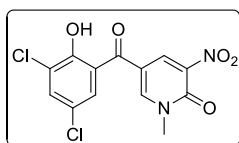

Isolated as yellow solid, 84 %, mp: 209-211 °C,  $^1\text{H}$  NMR (400 MHz, DMSO- $d_6$ )  $\delta$  8.72 (d,  $J = 1.8$  Hz, 1H), 8.56 (d,  $J = 2.0$  Hz, 1H), 7.72 (d,  $J = 2.2$  Hz, 1H), 7.36 (d,  $J = 2.2$  Hz, 1H), 3.60 (s, 3H).  $^{13}\text{C}$  NMR (100 MHz, DMSO- $d_6$ )  $\delta$  188.11, 154.03, 150.92, 150.50, 136.81, 136.60, 131.89, 128.11, 127.84, 123.54, 123.36, 113.82, 38.62 ppm. EI-HRMS: Anal. Calcd for  $\text{C}_{13}\text{H}_8\text{Cl}_2\text{N}_2\text{O}_5$ : 341.9810, Found: 341.9810.

### 3g:5-(2-hydroxy-5-methylbenzoyl)-1-methyl-3-nitropyridin-2(1H)-one

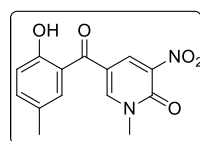

Isolated as yellow solid, 80 %, mp: 216-218 °C,  $^1\text{H}$  NMR (400 MHz, DMSO- $d_6$ )  $\delta$  10.18 (s, 1H), 8.77 (d,  $J = 2.4$  Hz, 1H), 8.56 (d,  $J = 2.5$  Hz, 1H), 7.27 (dd,  $J = 8.3$ , 1.9 Hz, 1H), 7.20 (d,  $J = 1.7$  Hz, 1H), 6.91 (d,  $J = 8.3$  Hz, 1H), 3.68 (s, 3H), 2.26 (s, 3H).  $^{13}\text{C}$  NMR (100 MHz, DMSO- $d_6$ )  $\delta$  195.55, 159.29, 158.83, 155.73, 143.10, 141.37, 139.31, 135.36, 133.50, 129.06, 121.92, 119.63, 43.86, 25.05 ppm. EI-HRMS: Anal. Calcd for  $\text{C}_{14}\text{H}_{12}\text{N}_2\text{O}_5$ : 288.0746, Found: 288.0743.

### 3h:5-(2-hydroxy-5-methoxybenzoyl)-1-methyl-3-nitropyridin-2(1H)-one

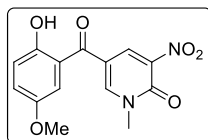

Isolated as yellow solid, 78 %, mp: 215-217 °C,  $^1\text{H}$  NMR (400 MHz, DMSO- $d_6$ )  $\delta$  9.86 (s, 1H), 8.71 (s, 1H), 8.52 (d,  $J = 2.0$  Hz, 1H), 7.02 (dd,  $J = 8.9, 2.9$  Hz, 1H), 6.91 – 6.77 (m, 2H), 3.68 (s, 3H), 3.62 (s, 3H).  $^{13}\text{C}$  NMR (100 MHz, DMSO- $d_6$ )  $\delta$  195.05, 159.34, 157.40, 155.77, 154.79, 142.97, 141.35, 129.46, 125.20, 123.13, 119.46, 118.86, 60.74, 43.80. EI-HRMS: Anal. Calcd for  $\text{C}_{14}\text{H}_{12}\text{N}_2\text{O}_6$ : 304.0695, Found: 304.0689.

### 3i: 5-(2-hydroxybenzoyl)-3-nitro-1-propylpyridin-2(1H)-one

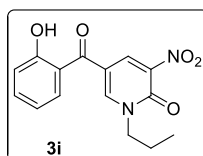

Isolated as yellow solid, 75 %, mp: 170-172°C,  $^1\text{H}$  NMR (400 MHz, DMSO- $d_6$ )  $\delta_{\text{H}}$  10.43 (1H, s), 8.70 (1H, d,  $J = 2.5$ ), 8.55 (1H, d,  $J = 2.5$ ), 7.51–7.36 (2H, m), 7.05 – 6.89 (2H, m), 4.08 (2H, t,  $J = 7.2$ ), 1.70 (2H, dd,  $J = 14.6, 7.3$ ), 0.88 (3H, t,  $J = 7.4$ ) ppm.  $^{13}\text{C}$  NMR (100 MHz, DMSO- $d_6$ ):  $\delta_{\text{C}}$  190.68, 156.30, 154.09, 150.36, 137.91, 137.26, 133.99, 130.84, 124.58, 120.00, 117.25, 115.02, 52.49, 22.24, 11.06 ppm. EI-HRMS: Anal. Calcd for  $\text{C}_{15}\text{H}_{14}\text{N}_2\text{O}_5$ : 302.0903, Found: 302.0900.

### 3j: 5-(5-chloro-2-hydroxybenzoyl)-3-nitro-1-propylpyridin-2(1H)-one

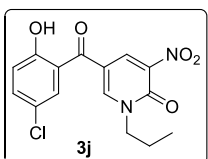

Isolated as yellow solid, 82 %, mp: 192-194°C,  $^1\text{H}$  NMR (400 MHz, DMSO- $d_6$ ):  $\delta_{\text{H}}$  10.55 (1H, d,  $J = 63.9$ ), 8.72 (1H, d,  $J = 2.5$ ), 8.56 (1H, d,  $J = 2.5$ ), 7.47 (1H, dd,  $J = 8.8, 2.7$ ), 7.38 (1H, d,  $J = 2.7$ ), 7.01 (1H, d,  $J = 8.8$ ), 4.08 (2H, t,  $J = 7.2$ ), 1.66 (2H, dd,  $J = 14.5, 7.3$ ), 0.88 (3H, t,  $J = 7.3$ ).  $^{13}\text{C}$  NMR (100 MHz, DMSO- $d_6$ ):  $\delta_{\text{C}}$  189.13, 154.83, 154.09, 150.69, 137.50, 137.47, 133.15, 129.73, 126.47, 123.55, 119.10, 114.66, 52.44, 22.22, 11.04. EI-HRMS: Anal. Calcd for  $\text{C}_{15}\text{H}_{13}\text{ClN}_2\text{O}_5$ : 336.0513, Found: 336.0512.

### 3k: 5-(2-hydroxy-5-methylbenzoyl)-3-nitro-1-propylpyridin-2(1H)-one

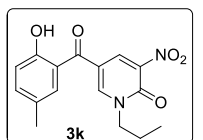

Isolated as yellow solid, 79 %, mp: 177-179°C,  $^1\text{H}$  NMR (400 MHz, DMSO- $d_6$ ):  $\delta_{\text{H}}$  10.16 (1H, s), 8.69 (1H, d,  $J = 2.5$ ), 8.56 (1H, t,  $J = 6.3$ ), 7.25 (1H, dt,  $J = 17.6, 8.8$ ), 7.20 (1H, s), 6.90 (1H, d,  $J = 8.3$ ), 4.16–3.98 (2H, m), 2.25 (3H, s), 1.77–1.63 (2H, m), 0.88 (3 H, t,  $J = 7.6$ ) ppm.  $^{13}\text{C}$  NMR (100 MHz, DMSO- $d_6$ ):  $\delta_{\text{C}}$  190.74, 154.13, 154.09, 150.38, 137.95, 137.28, 134.66, 130.76, 128.75, 124.27, 117.20, 115.05, 52.46, 22.23, 20.30, 11.07 ppm. EI-HRMS: Anal. Calcd for  $\text{C}_{16}\text{H}_{16}\text{N}_2\text{O}_5$ : 316.1059, Found: 316.1054.

### 3l: 1-butyl-5-(2-hydroxybenzoyl)-3-nitropyridin-2(1H)-one

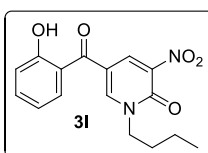

Isolated as yellow solid, 83 %, mp: 155-157°C,  $^1\text{H}$  NMR (400 MHz, DMSO- $d_6$ ):  $\delta_{\text{H}}$  10.42 (1H, s), 8.70 (1H, d,  $J = 2.5$ ), 8.55 (1H, d,  $J = 2.5$ ), 7.50 – 7.35 (2H, m), 6.99 (2H, dd,  $J = 16.0, 7.9$ ), 4.12 (1H, t,  $J = 7.3$ ), 3.40 (1H, d,  $J = 6.3$ ), 1.74 – 1.50 (2H, m), 1.37 – 1.22 (2 H, m), 0.88 (3 H, td,  $J = 7.3, 3.4$ ) ppm.  $^{13}\text{C}$  NMR (100 MHz, DMSO- $d_6$ ):  $\delta_{\text{C}}$  190.66, 156.37, 154.04, 150.30, 137.88, 133.96, 130.83, 124.54, 119.95, 117.25, 115.05, 112.70, 50.81, 30.96, 19.55, 13.87 ppm. EI-HRMS: Anal. Calcd for  $\text{C}_{16}\text{H}_{16}\text{N}_2\text{O}_5$ : 316.1059, Found: 316.1052.

112.70, 50.81, 30.96, 19.55, 13.87 ppm. EI-HRMS: Anal. Calcd for  $\text{C}_{16}\text{H}_{16}\text{N}_2\text{O}_5$ : 316.1059, Found: 316.1052.

### 3m:1-butyl-5-(5-chloro-2-hydroxybenzoyl)-3-nitropyridin-2(1H)-one

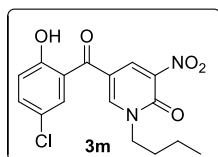

Isolated as yellow solid, 78 %, mp: 160-162°C,  $^1\text{H}$  NMR (400 MHz, DMSO- $d_6$ ):  $\delta_{\text{H}}$  (400 MHz, DMSO) 10.61 (1H, s), 8.72 (1H, d,  $J = 2.5$ ), 8.56 (1H, d,  $J = 2.5$ ), 7.47 (1H, dd,  $J = 8.8, 2.7$ ), 7.38 (1H, d,  $J = 2.7$ ), 7.02 (1H, d,  $J = 8.8$ ), 4.11 (2H, t,  $J = 7.3$ ), 1.71 – 1.56 (2H, m), 1.29 (2H, m), 0.90 (3 H, t,  $J = 7.3$ ) ppm.  $^{13}\text{C}$  NMR (100 MHz, DMSO- $d_6$ ):  $\delta_{\text{C}}$  189.11, 154.86, 154.07, 150.60, 137.51, 137.43, 133.15, 129.73, 126.48, 123.54, 119.11, 114.70, 50.77, 30.94, 19.52, 13.92. ppm. EI-HRMS: Anal. Calcd for  $\text{C}_{16}\text{H}_{15}\text{ClN}_2\text{O}_5$ : 350.0669, Found: 350.0664.

### 3n: 1-Butyl-5-(5-fluoro-2-hydroxybenzoyl)-3-nitropyridin-2(1H)-one

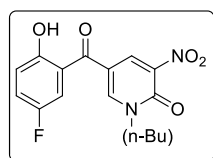

Isolated as yellow solid, 75 %, mp: 144-146 °C,  $^1\text{H}$  NMR (400 MHz,  $\text{CDCl}_3$ ):  $\delta_{\text{H}}$  10.86 (1H, s), 8.68 (1H, d,  $J = 2.6$ ), 8.30 (1H, d,  $J = 2.6$ ), 7.33 (1H, dd,  $J = 9.2, 7.7$ ), 7.21 (1H, dd,  $J = 8.4, 3.0$ ), 7.10 (1H, dd,  $J = 9.2, 4.5$ ), 4.22–4.04 (2 H, m), 1.89–1.77 (2H, m), 1.44 (2H, dd,  $J = 15.1, 7.5$ ), 1.00 (3H, t,  $J = 7.4$ ).  $^{13}\text{C}$  NMR (100 MHz,  $\text{CDCl}_3$ ):  $\delta_{\text{C}}$  192.21, 158.68-158.66 (d,  $J = 2.18$  Hz), 156.10, 153.71, 153.65, 147.43, 137.42, 124.73-124.49 (d,  $J = 23.84$  Hz), 120.70-120.63 (d,  $J = 7.59$  Hz), 117.80-117.74 (d,  $J = 7.11$  Hz), 116.13-115.89 (d,  $J = 23.69$  Hz), 113.92, 52.04, 31.08, 19.80, 13.50 ppm. EI-HRMS: Anal. Calcd for  $\text{C}_{16}\text{H}_{15}\text{FN}_2\text{O}_5$ : 334.0965, Found: 334.0961.

### 3o: cyclohexyl-5-(2-hydroxybenzoyl)-3-nitropyridin-2(1H)-one

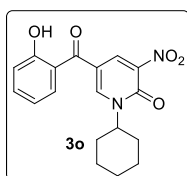

Isolated as yellow solid, 87 %, mp: 206-208°C,  $^1\text{H}$  NMR (400 MHz, DMSO- $d_6$ ):  $\delta_{\text{H}}$  10.47 (1H, s), 8.51 (2H, d,  $J = 3.7$ ), 7.56–7.28 (2H, m), 7.12–6.83 (2H, m), 4.72 (1H, dd,  $J = 16.2, 7.5$ ), 1.85 (4H, t,  $J = 13.5$ ), 1.62 (3H, dd,  $J = 20.7, 11.8$ ), 1.41 (2H, q,  $J = 12.7$ ), 1.22 (1H, t,  $J = 12.8$ ) ppm.  $^{13}\text{C}$  NMR (100 MHz, DMSO- $d_6$ ):  $\delta_{\text{C}}$  190.51, 156.29, 153.86, 146.42, 137.36, 137.17, 134.15, 131.02, 124.45, 120.09, 117.25, 115.09, 57.43, 31.61, 25.74, 24.90 ppm. EI-HRMS: Anal. Calcd for  $\text{C}_{18}\text{H}_{18}\text{N}_2\text{O}_5$ : 342.1216, Found: 342.1212.

### 3p:5-(5-chloro-2-hydroxybenzoyl)-1-cyclohexyl-3-nitropyridin-2(1H)-one

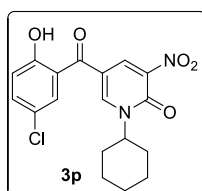

Isolated as yellow solid, 85 %, mp: 210-212°C,  $^1\text{H}$  NMR (400 MHz,  $\text{CDCl}_3$ ):  $\delta_{\text{H}}$  11.05 (1H, s), 8.62 (1H, s), 8.29 (1H, s), 7.52 (H, d,  $J = 8.9$ ), 7.47 (1H, s), 7.09 (1H, d,  $J = 8.9$ ), 5.00 (1H, t,  $J = 11.5$ ), 2.16 – 1.93 (4H, m), 1.82 (1H, d,  $J = 13.9$ ), 1.66 – 1.40 (4H, m), 1.32 – 1.06 (1H, m) ppm.  $^{13}\text{C}$  NMR (100 MHz,  $\text{CDCl}_3$ ):  $\delta_{\text{C}}$  192.38, 161.06, 153.52, 144.21, 137.67, 136.77, 136.41, 130.13, 124.27, 120.85, 118.88, 113.78, 57.05, 32.81, 25.63, 25.02 ppm. EI-HRMS: Anal. Calcd for  $\text{C}_{18}\text{H}_{17}\text{ClN}_2\text{O}_5$ : 376.0826, Found: 376.0820.

### 3q: 1-Benzyl-5-(5-chloro-2-hydroxybenzoyl)-3-nitropyridin-2(1H)-one

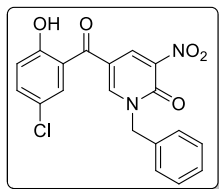

Isolated as yellow solid, 65 %, mp: 186-188 °C,  $^1\text{H}$  NMR (400 MHz,  $\text{CDCl}_3$ ):  $\delta_{\text{H}}$  11.00 (s, 1H), 8.67 (d,  $J = 2.6$  Hz, 1H), 8.23 (d,  $J = 2.6$  Hz, 1H), 7.46 – 7.40 (m, 5H), 7.32 (d,  $J = 2.6$  Hz, 1H), 7.26 (s, 1H), 7.05 (d,  $J = 8.9$  Hz, 1H), 5.29 (s, 2H).

$^{13}\text{C}$  NMR (100 MHz,  $\text{CDCl}_3$ ):  $\delta_{\text{C}}$  191.99, 161.00, 153.81, 146.69, 137.31, 136.80, 133.52, 129.95, 129.74, 129.57, 129.06, 127.42, 124.22, 120.81, 118.81, 114.01.

54.11 ppm. EI-HRMS: Anal. Calcd for  $\text{C}_{19}\text{H}_{13}\text{ClN}_2\text{O}_5$ : 384.0513, Found: 384.0511.

### 3r:1-Benzyl-5-(3,5-dichloro-2-hydroxybenzoyl)-3-nitropyridin-2(1H)-one

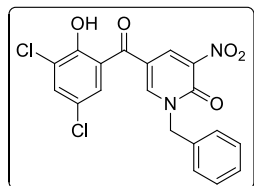

Isolated as yellow solid, 78 %, mp: 180-182 °C,  $^1\text{H}$  NMR (400 MHz,  $\text{CDCl}_3$ ):  $\delta_{\text{H}}$  11.07 (1H, s), 8.66 (1H, d,  $J = 2.6$ ), 8.24 (1H, d,  $J = 2.6$ ), 7.61 (1H, d,  $J = 2.4$ ), 7.48–7.37 (5H, m), 7.26 (1H, d,  $J = 2.2$ ), 5.29 (2H, s).  $^{13}\text{C}$  NMR (100 MHz,  $\text{CDCl}_3$ ):  $\delta_{\text{C}}$  191.44, 160.47, 156.13, 153.78, 147.03, 137.17, 136.03, 133.38, 129.75, 129.62, 129.10, 128.56, 124.77, 124.24, 119.88, 113.70, 54.14 ppm. EI-

HRMS: Anal. Calcd for  $\text{C}_{19}\text{H}_{12}\text{Cl}_2\text{N}_2\text{O}_5$ : 418.0123, Found: 418.0122.

### 3s:1-Benzyl-5-(2-hydroxy-5-methylbenzoyl)-3-nitropyridin-2(1H)-one

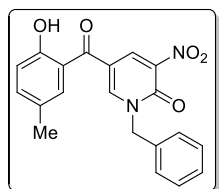

Isolated as yellow solid, 72 %, mp: 184-186°C,  $^1\text{H}$  NMR (400 MHz,  $\text{CDCl}_3$ ):  $\delta_{\text{H}}$  10.96 (1H, s), 8.67 (1H, d,  $J = 2.5$ ), 8.26 (1H, d,  $J = 2.5$ ), 7.46–7.39 (5H, m), 7.34 (1H, dd,  $J = 8.5, 2.0$ ), 7.10 (1H, d,  $J = 1.3$ ), 6.97 (1H, d,  $J = 8.5$ ), 5.30 (2H, s), 2.22 (3 H, s).  $^{13}\text{C}$

NMR (100 MHz,  $\text{CDCl}_3$ ):  $\delta_{\text{C}}$  192.91, 160.57, 153.93, 146.80, 138.09, 137.92, 137.80, 133.96, 130.73, 129.55, 129.37, 129.02, 128.69, 118.91, 117.83, 114.71, 53.84, 20.49 ppm. EI-

HRMS: Anal. Calcd for  $\text{C}_{20}\text{H}_{16}\text{N}_2\text{O}_5$ : 364.1059, Found: 364.1056.

### 5a:1-methyl-2-(methylamino)-3-nitro-1H-chromeno[2,3-b]pyridin-5(10aH)-one

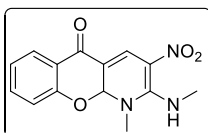

Isolated as yellow solid, 94 %, mp: 200-202°C,  $^1\text{H}$  NMR (400 MHz,  $\text{DMSO}-d_6$ )  $\delta$  10.59 (d,  $J = 3.7$  Hz, 1H), 7.90 (s, 1H), 7.81 (dd,  $J = 7.8, 1.5$  Hz, 1H), 7.63 – 7.56 (m, 1H), 7.15 (t,  $J = 7.2$  Hz, 1H), 7.07 (d,  $J = 8.2$  Hz, 1H), 6.40 (d,  $J = 16.6$  Hz, 1H), 3.51

(s, 3H), 3.25 (d,  $J = 5.1$  Hz, 3H).  $^{13}\text{C}$  NMR (100 MHz,  $\text{DMSO}-d_6$ )  $\delta$  179.39, 157.41, 156.49, 136.07, 126.85, 126.52, 122.87, 122.47, 118.14, 113.10, 112.97, 90.49, 42.71, 33.89. EI-HRMS: Anal. Calcd for  $\text{C}_{14}\text{H}_{13}\text{N}_3\text{O}_4$ : 287.0906, Found: 287.0902.

### 5b:7-chloro-1-methyl-2-(methylamino)-3-nitro-1H-chromeno[2,3-b]pyridin-5(10aH)-one

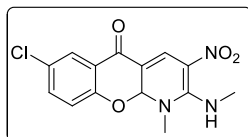

Isolated as yellow solid, 93 %, mp: 219-221°C,  $^1\text{H}$  NMR (400 MHz,  $\text{DMSO}-d_6$ )  $\delta$  10.54 (s, 1H), 7.94 (s, 1H), 7.74 (d,  $J = 2.7$  Hz, 1H), 7.65 (dd,  $J = 8.8, 2.7$  Hz, 1H), 7.14 (d,  $J = 8.8$  Hz, 1H), 6.44 (s, 1H), 3.52 (s, 3H), 3.25 (d,  $J = 5.2$  Hz,

3H).  $^{13}\text{C}$  NMR (100 MHz,  $\text{DMSO}$ )  $\delta$  179.42, 157.41, 154.48, 136.86, 131.61, 126.43, 126.36, 122.51, 117.94, 113.32, 112.92, 90.38, 42.68, 33.88 ppm. EI-HRMS: Anal. Calcd for  $\text{C}_{14}\text{H}_{12}\text{ClN}_3\text{O}_4$ : 321.0516, Found: 321.0513



**5c: 7-bromo-1-methyl-2-(methylamino)-3-nitro-1H-chromeno[2,3-b]pyridin-5(10aH)-one**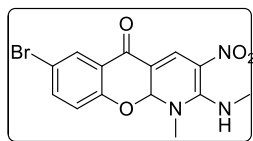

Isolated as yellow solid, 95 %, mp: 220-222°C,  $^1\text{H}$  NMR (400 MHz,  $\text{DMSO-}d_6$ )  $\delta$  10.54 (s, 1H), 7.94-7.81 (m, 2H), 7.74 (dd,  $J = 8.7, 2.3$ , 1H) 7.08 (d,  $J = 8.8$  Hz, 1H), 6.45 (s, 1H), 3.52 (s, 3H), 3.25 (d,  $J = 5.3$  Hz, 3H) ppm.  $^{13}\text{C}$  NMR (100 MHz,  $\text{DMSO-}d_6$ )  $\delta_c$  178.67, 157.83, 156.03, 138.84, 132.12, 129.31, 124.96, 121.34, 114.69, 113.69, 112.39, 91.36, 43.32, 34.46 ppm. EI-HRMS: Anal. Calcd for  $\text{C}_{14}\text{H}_{12}\text{BrN}_3\text{O}_4$ : 365.0011, Found: 365.0010

**5d: 7-methyl-1-methyl-2-(methylamino)-3-nitro-1H-chromeno[2,3-b]pyridin-5(10aH)-one**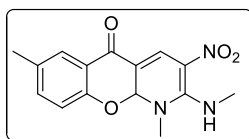

Isolated as yellow solid, 92 %, mp: 192-194°C,  $^1\text{H}$  NMR (400 MHz,  $\text{DMSO-}d_6$ )  $\delta$  10.60 (d,  $J = 4.5$  Hz, 1H), 7.90 (s, 1H), 7.60 (d,  $J = 1.5$  Hz, 1H), 7.42 (dd,  $J = 8.4, 2.1$  Hz, 1H), 6.98 (d,  $J = 8.4$  Hz, 1H), 6.33 (s, 1H), 3.51 (s, 3H), 3.26 (d,  $J = 5.2$  Hz, 3H), 2.30 (s, 3H).  $^{13}\text{C}$  NMR (100 MHz,  $\text{DMSO-}d_6$ )  $\delta$  179.42, 157.42, 154.49, 136.86, 131.62, 126.43, 126.36, 122.52, 117.94, 113.32, 112.93, 90.39, 42.66, 33.87, 20.00. EI-HRMS: Anal. Calcd for  $\text{C}_{15}\text{H}_{15}\text{N}_3\text{O}_4$ : 301.1063, Found: 301.1060

**5e: 1-Butyl-2-(butylamino)-3-nitro-1H-chromeno[2,3-b]pyridin-5(10aH)-one**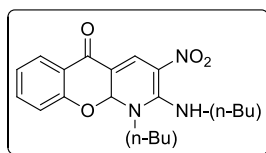

Isolated as yellow semi solid, 87 %,  $^1\text{H}$  NMR (400 MHz,  $\text{CDCl}_3$ )  $\delta_H$  11.07 (1 H, d,  $J = 2.5$ ), 8.16 (1 H, s), 7.92 (1 H, dd,  $J = 7.8, 1.6$ ), 7.54 – 7.43 (1 H, m), 7.12 – 7.02 (1 H, m), 6.97 (1 H, d,  $J = 8.2$ ), 6.13 (1 H, s), 3.91 – 3.43 (4 H, m), 1.92 – 1.71 (4 H, m), 1.50 (2 H, dd,  $J = 15.1, 7.5$ ), 1.46 – 1.30 (2 H, m), 0.99 (6 H, td,  $J = 7.3, 5.7$ ).  $^{13}\text{C}$  NMR (100 MHz,  $\text{CDCl}_3$ )  $\delta_c$  180.44, 157.03, 156.66, 135.87, 127.65, 123.39, 122.66, 117.98, 114.18, 114.12, 89.09, 54.18, 47.48, 32.10, 29.97, 19.86, 19.83, 13.73, 13.52 ppm. EI-HRMS: Anal. Calcd for  $\text{C}_{20}\text{H}_{25}\text{N}_3\text{O}_4$ : 371.1845, Found: 371.1838

**5f: 1-Butyl-2-(butylamino)-7-chloro-3-nitro-1H-chromeno[2,3-b]pyridin-5(10aH)-one**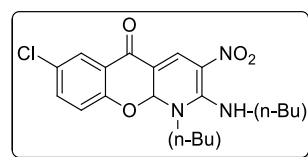

Isolated as yellow semi solid, 85 %,  $^1\text{H}$  NMR (400 MHz,  $\text{CDCl}_3$ )  $\delta_H$  11.01 (1H, s), 8.19 (1H, s), 7.88 (1H, d,  $J = 1.1$ ), 7.43 (1H, dd,  $J = 8.7, 2.8$ ), 6.93 (1H, d,  $J = 8.8$ ), 6.12 (1H, s), 3.92 – 3.79 (1H, m), 3.78 – 3.64 (1H, m), 3.65 – 3.53 (1H, m), 3.48 (1H, dd,  $J = 12.5, 6.3$ ), 1.79 (4 H, dd,  $J = 12.9, 5.7$ ), 1.50 (2H, dd,  $J = 15.0, 7.5$ ), 1.45 – 1.33 (2H, m), 0.99 (6H, td,  $J = 7.3, 5.4$ ) ppm.  $^{13}\text{C}$  NMR (100 MHz,  $\text{CDCl}_3$ )  $\delta_c$  179.26, 157.01, 154.99, 135.60, 128.53, 128.21, 127.07, 124.33, 119.64, 114.36, 112.99, 89.32, 54.31, 47.54, 32.10, 29.95, 19.87, 19.83, 13.72, 13.51 ppm. EI-HRMS: Anal. Calcd for  $\text{C}_{20}\text{H}_{24}\text{ClN}_3\text{O}_4$ : 405.1455, Found: 405.1454

**5g: 1-Butyl-2-(butylamino)-7,9-dichloro-3-nitro-1H-chromeno[2,3-b]pyridin-5(10aH)-one**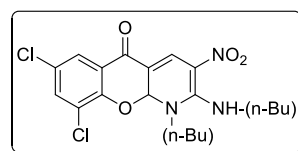

Isolated as yellow semi solid, 89 %,  $^1\text{H}$  NMR (400 MHz,  $\text{CDCl}_3$ )  $\delta_H$  11.04 (1 H, s), 8.25 (1 H, s), 7.81 (1 H, d,  $J = 2.5$ ), 7.55 (1H, d,  $J = 2.5$ ), 6.19 (1H,

s), 3.78 (2H, t,  $J = 7.9$ ), 3.66–3.40 (2H, m), 2.03 – 1.77 (4H, m), 1.59–1.33 (4 H, m). 1.0 (6H, t,  $J = 7.0$ ).  $^{13}\text{C}$  NMR (100 MHz,  $\text{CDCl}_3$ )  $\delta_{\text{C}}$  178.41, 156.95, 155.36, 135.17, 129.41, 127.94, 125.82, 125.24, 124.17, 114.39, 111.77, 90.44, 54.63, 47.61, 32.14, 30.40, 19.95, 19.87, 13.71, 13.51 ppm. EI-

HRMS: Anal. Calcd for  $\text{C}_{20}\text{H}_{23}\text{Cl}_2\text{N}_3\text{O}_4$ : 439. 1066, Found: 439. 1063

**5h: 7-Bromo-1-butyl-2-(butylamino)-3-nitro-1H-chromeno[2,3-b]pyridin-5(10aH)-one**

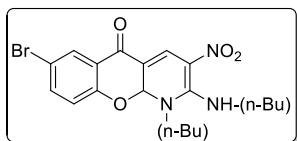

Isolated as yellow semi solid, 80 %,  $^1\text{H}$  NMR (400 MHz,  $\text{CDCl}_3$ )  $\delta_{\text{H}}$  11.01 (1H, d,  $J = 2.5$ ), 8.18 (1H, s), 8.02 (1H, d,  $J = 2.5$ ), 7.56 (1H, dd,  $J = 8.7$ , 2.5), 6.87 (1H, d,  $J = 8.7$ ), 6.12 (1H, s), 3.97– 3.34 (4H, m), 1.94–1.69 (4H, m), 1.58–1.33 (4H, m), 0.99 (6H, td,  $J = 7.3$ , 5.1) ppm.  $^{13}\text{C}$  NMR (100 MHz,

$\text{CDCl}_3$ )  $\delta_{\text{C}}$  179.14, 157.00, 155.47, 138.41, 130.16, 128.55, 124.75, 119.99, 115.42, 114.36, 112.90, 89.31, 54.32, 47.54, 32.10, 29.96, 19.87, 19.83, 13.73, 13.52 ppm. EI-HRMS: Anal. Calcd for  $\text{C}_{20}\text{H}_{24}\text{BrN}_3\text{O}_4$ : 449.0950, Found: 449.0950

**5i: 1-Butyl-2-(butylamino)-7-fluoro-3-nitro-1H-chromeno[2,3-b]pyridin-5(10aH)-one**

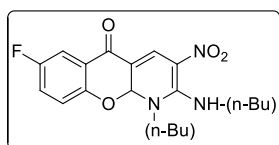

Isolated as yellow semi solid, 84 %,  $^1\text{H}$  NMR (400 MHz,  $\text{CDCl}_3$ )  $\delta_{\text{H}}$  11.03 (1 H, s), 8.18 (1 H, d,  $J = 2.5$ ), 7.60 – 7.53 (1 H, m), 7.24 – 7.15 (1 H, m), 6.96 (1 H, dd,  $J = 9.0$ , 4.2), 6.12 (1 H, s), 3.90 – 3.43 (4 H, m), 1.80 (4 H, dd,  $J = 14.3$ , 7.0), 1.45 (4 H, ddd,  $J = 44.7$ , 14.8, 7.4), 1.00 (6 H, dt,  $J = 11.8$ , 6.0) ppm.  $^{13}\text{C}$

NMR (100 MHz,  $\text{CDCl}_3$ )  $\delta_{\text{C}}$  179.56, 157.04, 152.69-152.68 (d,  $J = 1.96$  Hz), 128.42, 124.27-124.20 (d,  $J = 6.47$  Hz), 123.28-123.03 (d,  $J = 24.31$  Hz), 119.64-119.56 (d,  $J = 7.59$  Hz), 114.34, 113.20, 113.03, 112.79, 89.25, 54.24, 47.53, 32.09, 29.93, 19.86, 19.83, 13.72, 13.51 ppm. EI-HRMS: Anal. Calcd for  $\text{C}_{20}\text{H}_{24}\text{FN}_3\text{O}_4$ : 389.1751, Found: 389.1748.

**5j: 1-Butyl-2-(butylamino)-7-methyl-3-nitro-1H-chromeno[2,3-b]-pyridin-5(10aH)-one**

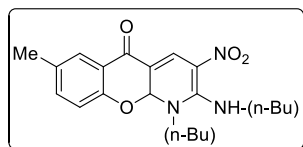

Isolated as yellow semi solid, 86 %,  $^1\text{H}$  NMR (400 MHz,  $\text{CDCl}_3$ )  $\delta_{\text{H}}$  11.09 (1H, d,  $J = 10.6$ ), 8.20 (1H, d,  $J = 0.4$ ), 7.76 (1H, d,  $J = 1.6$ ), 7.32 (1H, dd,  $J = 8.3$ , 2.1), 6.87 (1H, d,  $J = 8.4$ ), 6.08 (1H, s), 3.82 – 3.45 (4H, m), 1.78 (4H, m), 1.53 (2H, m), 1.37 (2H, dd,  $J = 14.7$ , 7.3), 1.0 (6H, t,  $J = 6.9$ ) ppm.  $^{13}\text{C}$

NMR (100 MHz,  $\text{CDCl}_3$ )  $\delta_{\text{C}}$  180.65, 157.12, 154.63, 136.87, 132.35, 127.64, 127.44, 123.07, 117.69, 114.36, 114.23, 89.02, 54.09, 47.50, 32.13, 29.92, 20.50, 19.88, 19.84, 13.73, 13.53 ppm. EI-HRMS: Anal. Calcd for  $\text{C}_{21}\text{H}_{27}\text{N}_3\text{O}_4$ : 385.2002, Found: 385.2000

**5k: 2-(butylamino)-1-methyl-3-nitro-1H-chromeno[2,3-b]pyridin-5(10aH)-one**

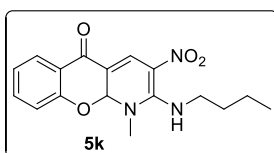

Isolated as yellow semi solid, 80 %,  $^1\text{H}$  NMR (400 MHz,  $\text{DMSO}-d_6$ )  $\delta_{\text{H}}$  11.68 (1H, s), 8.94 (1H, s), 8.85 (1H, d,  $J = 7.6$ ), 8.65 (1H, t,  $J = 7.6$ ), 8.20 (1H, t,  $J = 7.5$ ), 8.12 (1H, d,  $J = 8.3$ ), 7.42 (1H, s) 4.81–4.74 (1 H, m), 4.63 (1H, d,  $J =$

4.6), 4.55 (3H, s), 2.73–2.61 (2H, m), 2.41 (2H, dd,  $J = 14.9, 7.3$ ), 1.95 (3H, t,  $J = 7.3$ ) ppm.  $^{13}\text{C}$  NMR (100 MHz, DMSO- $d_6$ )  $\delta_{\text{C}}$  181.03, 158.18, 158.02, 137.75, 128.41, 127.85, 124.34, 124.12, 119.70, 115.08, 114.48, 91.85, 48.25, 44.32, 33.15, 20.70, 14.92 ppm. EI-HRMS: Anal. Calcd for  $\text{C}_{17}\text{H}_{19}\text{N}_3\text{O}_4$ : 329.1376, Found: 329.1371.

**5l:2-(butylamino)-7-chloro-1-methyl-3-nitro-1H-chromeno[2,3-b]pyridin-5(10aH)-one**

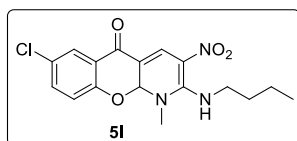

Isolated as yellow semi solid, 84 %,  $^1\text{H}$  NMR (400 MHz, DMSO- $d_6$ )  $\delta_{\text{H}}$  10.60 (1H, s), 7.93 (1H, s), 7.73 (1H, d,  $J = 2.7$ ), 7.64 (1H, dd,  $J = 8.8, 2.7$ ), 7.13 (1H, d,  $J = 8.8$ ), 6.44 (1H, s), 3.84–3.67 (1H, m), 3.67–3.54 (1H, m), 3.51 (3H, s), 1.65 (2H, dt,  $J = 14.0, 6.9$ ), 1.45–1.31 (2H, m), 0.92 (3H, t,  $J = 7.4$ )

ppm.  $^{13}\text{C}$  NMR (100 MHz, DMSO- $d_6$ )  $\delta_{\text{C}}$  178.80, 157.09, 155.63, 136.13, 127.13, 126.28, 124.48, 121.03, 118.86, 113.65, 112.89, 91.13, 47.24, 43.40, 32.09, 19.67, 13.89 ppm. EI-HRMS: Anal. Calcd for  $\text{C}_{17}\text{H}_{18}\text{ClN}_3\text{O}_4$ : 363.0986, Found: 363.0980.

**5m:2-(butylamino)-1,7-dimethyl-3-nitro-1H-chromeno[2,3-b]pyridin-5(10aH)-one**

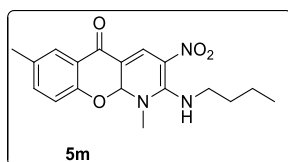

Isolated as yellow semi solid, 83 %,  $^1\text{H}$  NMR (400 MHz, DMSO- $d_6$ )  $\delta_{\text{H}}$  10.65 (1H, d,  $J = 2.5$ ), 7.88 (1H, s), 7.59 (1H, d,  $J = 1.6$ ), 7.41 (1H, dd,  $J = 8.4, 2.1$ ), 6.96 (1H, d,  $J = 8.4$ ), 6.31 (1H, s), 3.85–3.64 (1H, m), 3.57 (1H, dd,  $J = 13.6, 7.1$ ), 3.50 (3H, s), 2.29 (3H, s), 1.71–1.57 (2H, m), 1.36 (2H, m), 0.91 (3H, t,  $J = 7.4$ )

ppm.  $^{13}\text{C}$  NMR (100 MHz, DMSO- $d_6$ )  $\delta_{\text{C}}$  179.95, 157.14, 154.98, 137.43, 132.20, 126.93, 126.65, 122.97, 118.44, 114.21, 113.40, 90.72, 47.21, 43.20, 32.14, 20.49, 19.68, 13.87. EI-HRMS: Anal. Calcd for  $\text{C}_{18}\text{H}_{21}\text{N}_3\text{O}_4$ : 343.1532, Found: 343.1529.

**5n:1-benzyl-5-(5-chloro-2-hydroxybenzoyl)-3-nitropyridin-2(1H)-one**

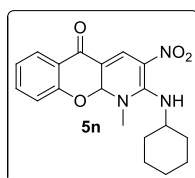

Isolated as yellow semi solid, 85 %,  $^1\text{H}$  NMR (400 MHz, DMSO- $d_6$ )  $\delta_{\text{H}}$  10.69 (1H, d,  $J = 8.2$ ), 7.89 (1H, s), 7.81 (1H, dd,  $J = 7.8, 1.3$ ), 7.6–7.51 (1H, m), 7.16 (2H, d,  $J = 7.4$ ), 6.40 (1H, s), 4.02–3.92 (1H, m), 3.50 (3H, s), 2.08 (1H, d,  $J = 9.6$ ), 1.91–1.81 (1H, m), 1.71 (1H, d,  $J = 8.8$ ), 1.60–1.14 (7H, m) ppm.  $^{13}\text{C}$  NMR (100 MHz, DMSO- $d_6$ )  $\delta_{\text{C}}$

179.94, 156.92, 156.37, 136.66, 127.35, 126.64, 123.32, 123.06, 118.68, 114.12, 113.84, 90.94, 55.21, 43.24, 34.12, 33.15, 25.17, 24.07, 23.88 ppm. EI-HRMS: Anal. Calcd for  $\text{C}_{19}\text{H}_{21}\text{N}_3\text{O}_4$ : 355.1532, Found: 355.1533.

**5o:7-chloro-2-(cyclohexylamino)-1-methyl-3-nitro-1H-chromeno[2,3-b]pyridin-5(10aH)-one**

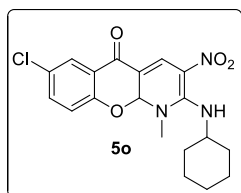

Isolated as yellow semi solid, 87 %,  $^1\text{H}$  NMR (400 MHz, DMSO- $d_6$ )  $\delta_{\text{H}}$  10.45 (1H, d,  $J = 7.7$ ), 7.71 (1H, s), 7.51 (1H, d,  $J = 2.1$ ), 7.42 (1H, dd,  $J = 8.7, 2.2$ ), 6.92 (1H, d,  $J = 8.8$ ), 6.23 (1H, s), 3.77 (1H, s), 3.29 (3H, s), 1.87 (1H, s), 1.67 (1H, d,

$J = 8.5$ ), 1.50 (1H, s), 1.44 –1.02 (7H, m) ppm.  $^{13}\text{C}$  NMR (100 MHz,  $\text{DMSO-}d_6$ )  $\delta_{\text{C}}$  178.87, 156.32, 155.59, 136.19, 127.50, 127.18, 126.28, 124.47, 121.10, 114.02, 113.08, 91.21, 55.27, 43.40, 34.07, 33.11, 25.14, 24.05, 23.89 ppm. EI-HRMS: Anal. Calcd for  $\text{C}_{19}\text{H}_{20}\text{ClN}_3\text{O}_4$ : 389.1142, Found: 389.1140.

**5p:2-(cyclohexylamino)-1,7-dimethyl-3-nitro-1*H*-chromeno[2,3-*b*]pyridin-5(10*aH*)-one**

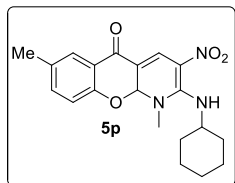

Isolated as yellow semi solid, 86 %,  $^1\text{H}$  NMR (400 MHz,  $\text{DMSO-}d_6$ )  $\delta_{\text{H}}$  10.70 (1 H, d,  $J = 8.2$ ), 7.88 (1H, s), 7.60 (1H, d,  $J = 1.3$ ), 7.42 (1H, dd,  $J = 8.4, 2.0$ ), 6.99 (1H, d,  $J = 8.4$ ), 6.36 (1H, s), 4.01–3.91 (1H, m), 3.49 (3H, s), 2.29 (3H, s), 2.08 (1H, d,  $J = 9.9$ ), 1.95–1.82 (1H, m), 1.72 (1H, dd,  $J = 9.4, 3.8$ ), 1.45 (7H, m) ppm.  $^{13}\text{C}$  NMR (100 MHz,  $\text{DMSO-}d_6$ )  $\delta_{\text{C}}$  180.04, 156.41, 154.95, 137.52, 132.27, 126.95, 126.49, 122.98, 118.52, 114.40, 113.79, 90.84, 55.20, 43.24, 34.10, 33.14, 25.16, 24.06, 23.87, 20.50 ppm. EI-HRMS: Anal. Calcd for  $\text{C}_{20}\text{H}_{23}\text{N}_3\text{O}_4$ : 369.1689, Found: 369.1684.

# <sup>1</sup>H and <sup>13</sup>C NMR Spectra of Compound (3a)

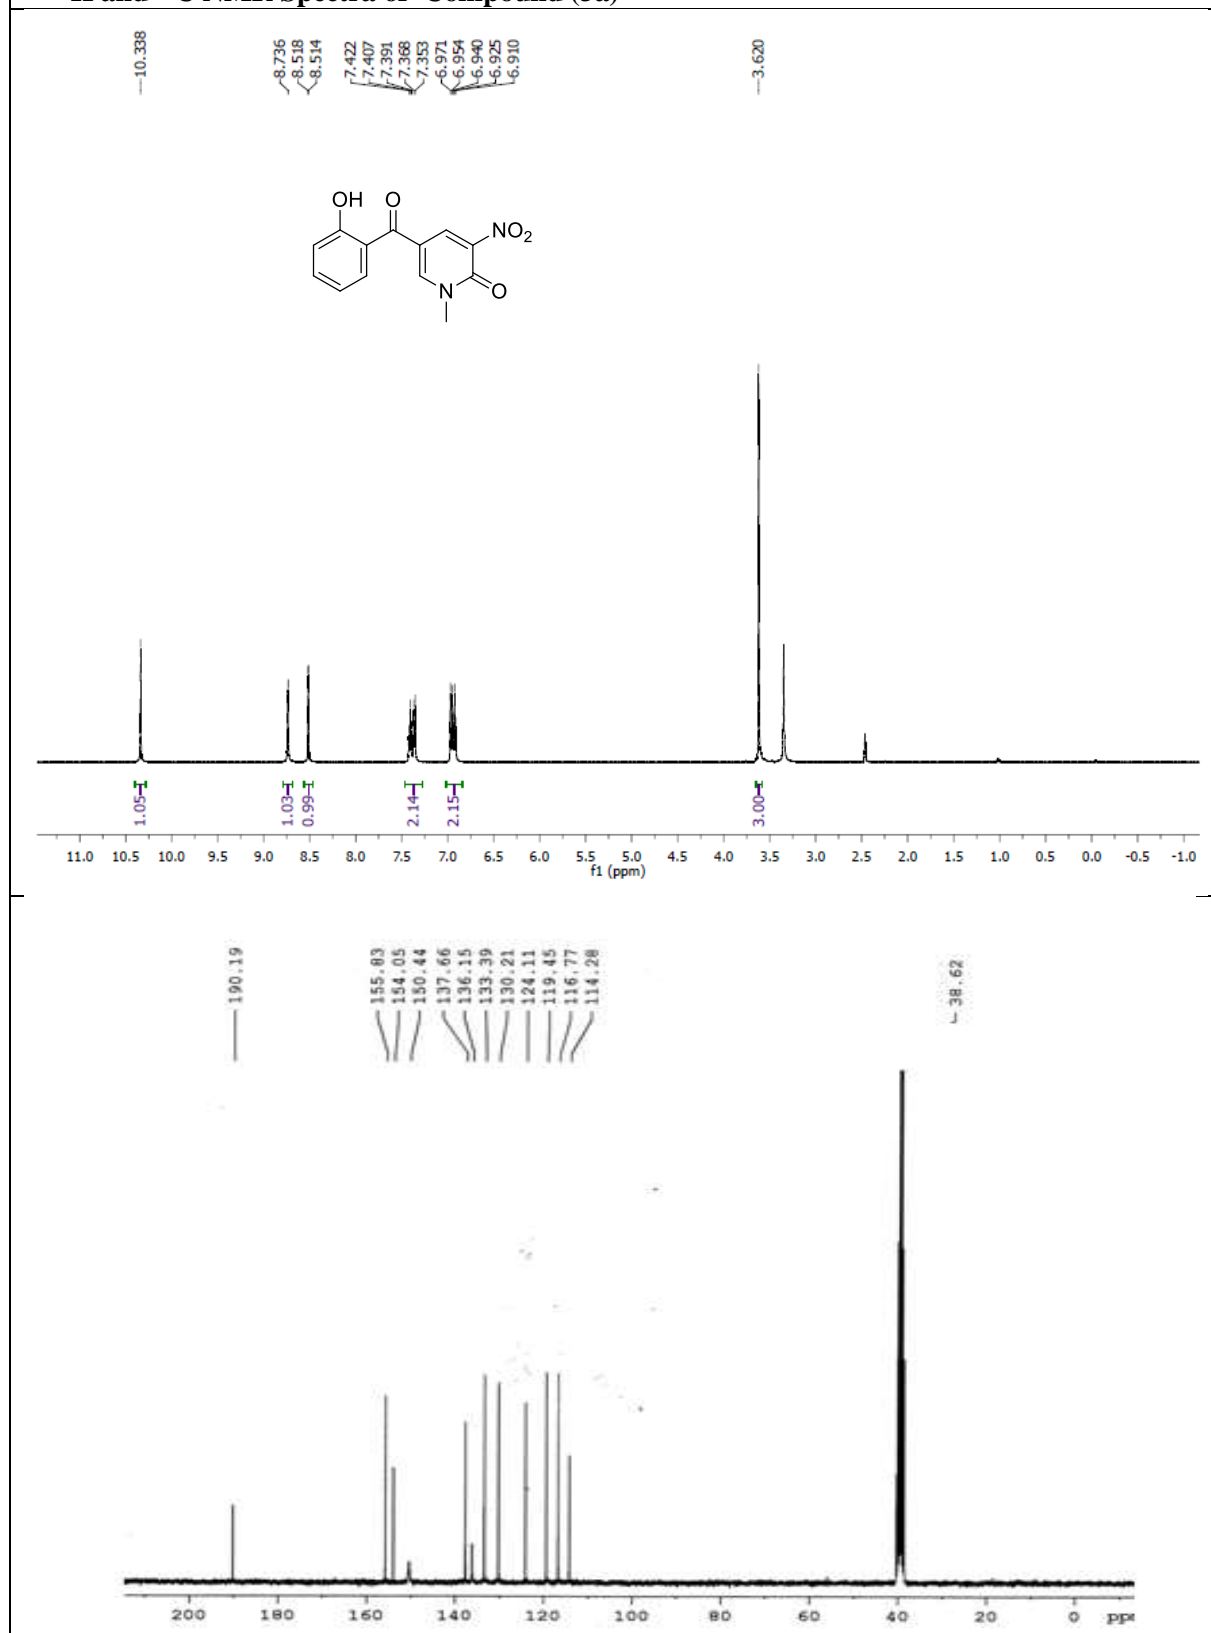

# <sup>1</sup>H and <sup>13</sup>C NMR Spectra of Compound (3b)

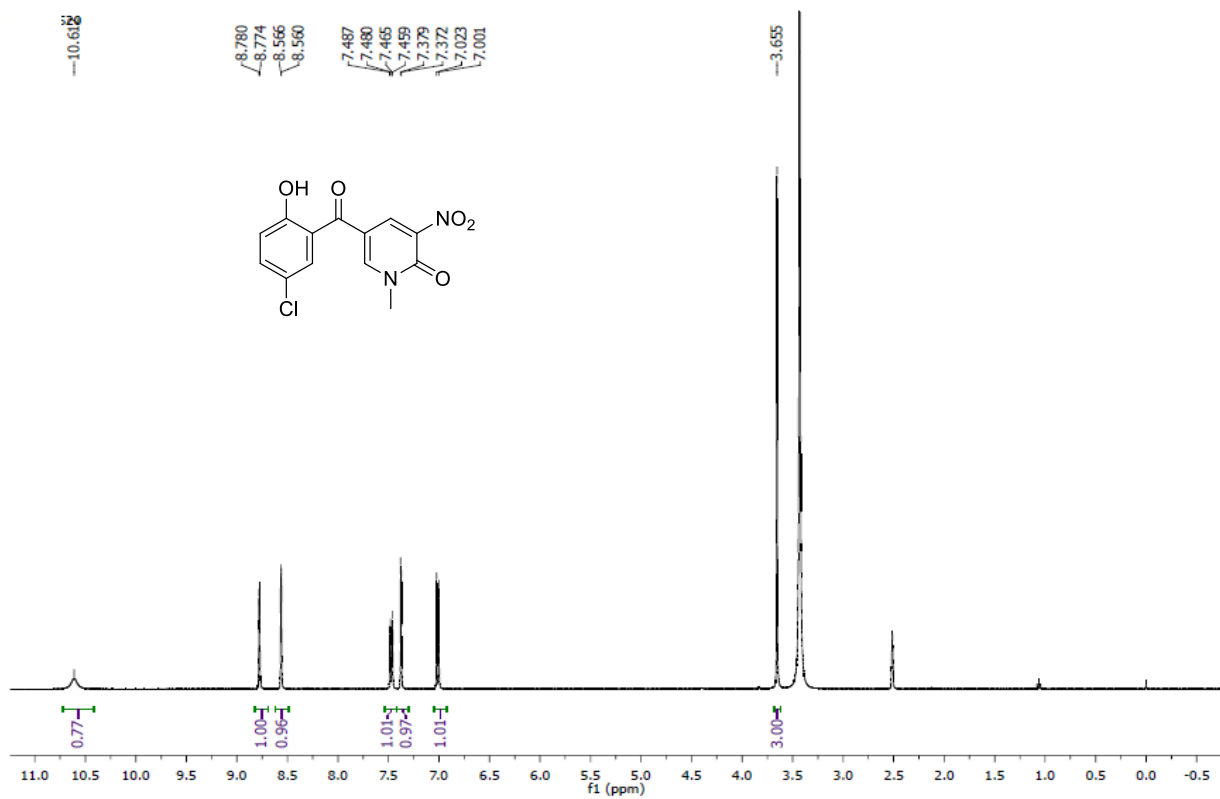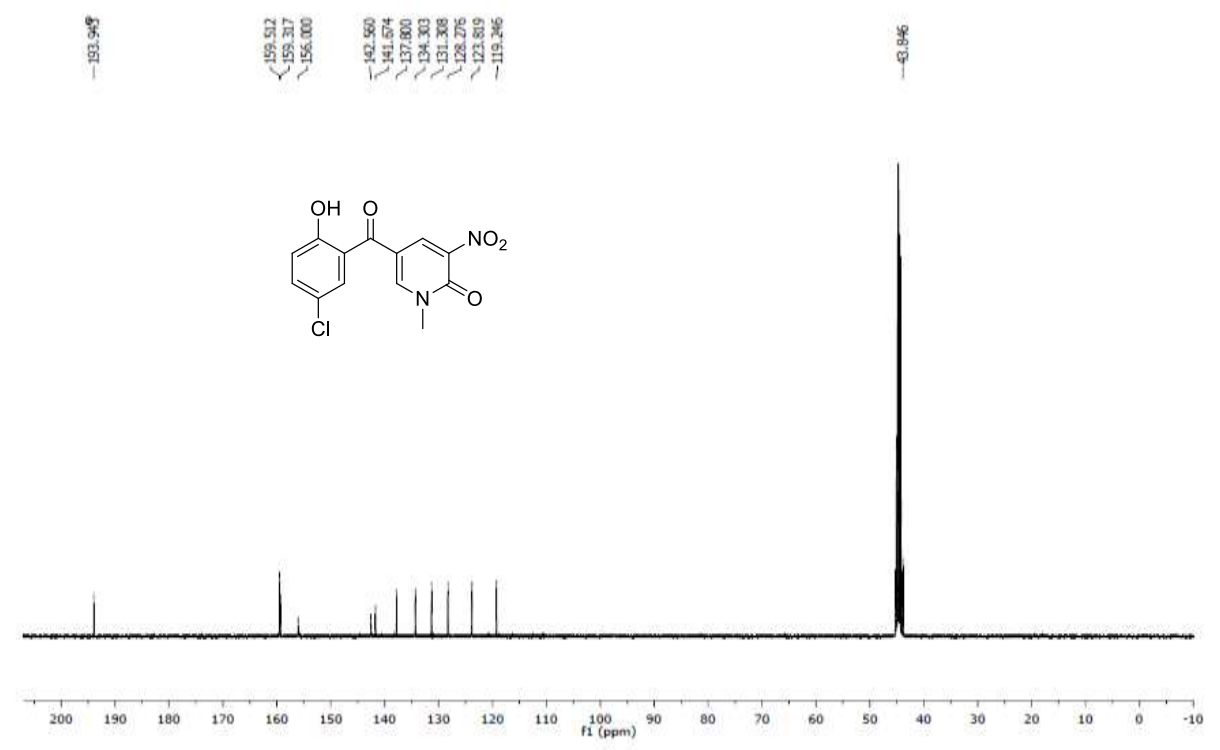

# <sup>1</sup>H and <sup>13</sup>C NMR Spectra of Compound (3c)

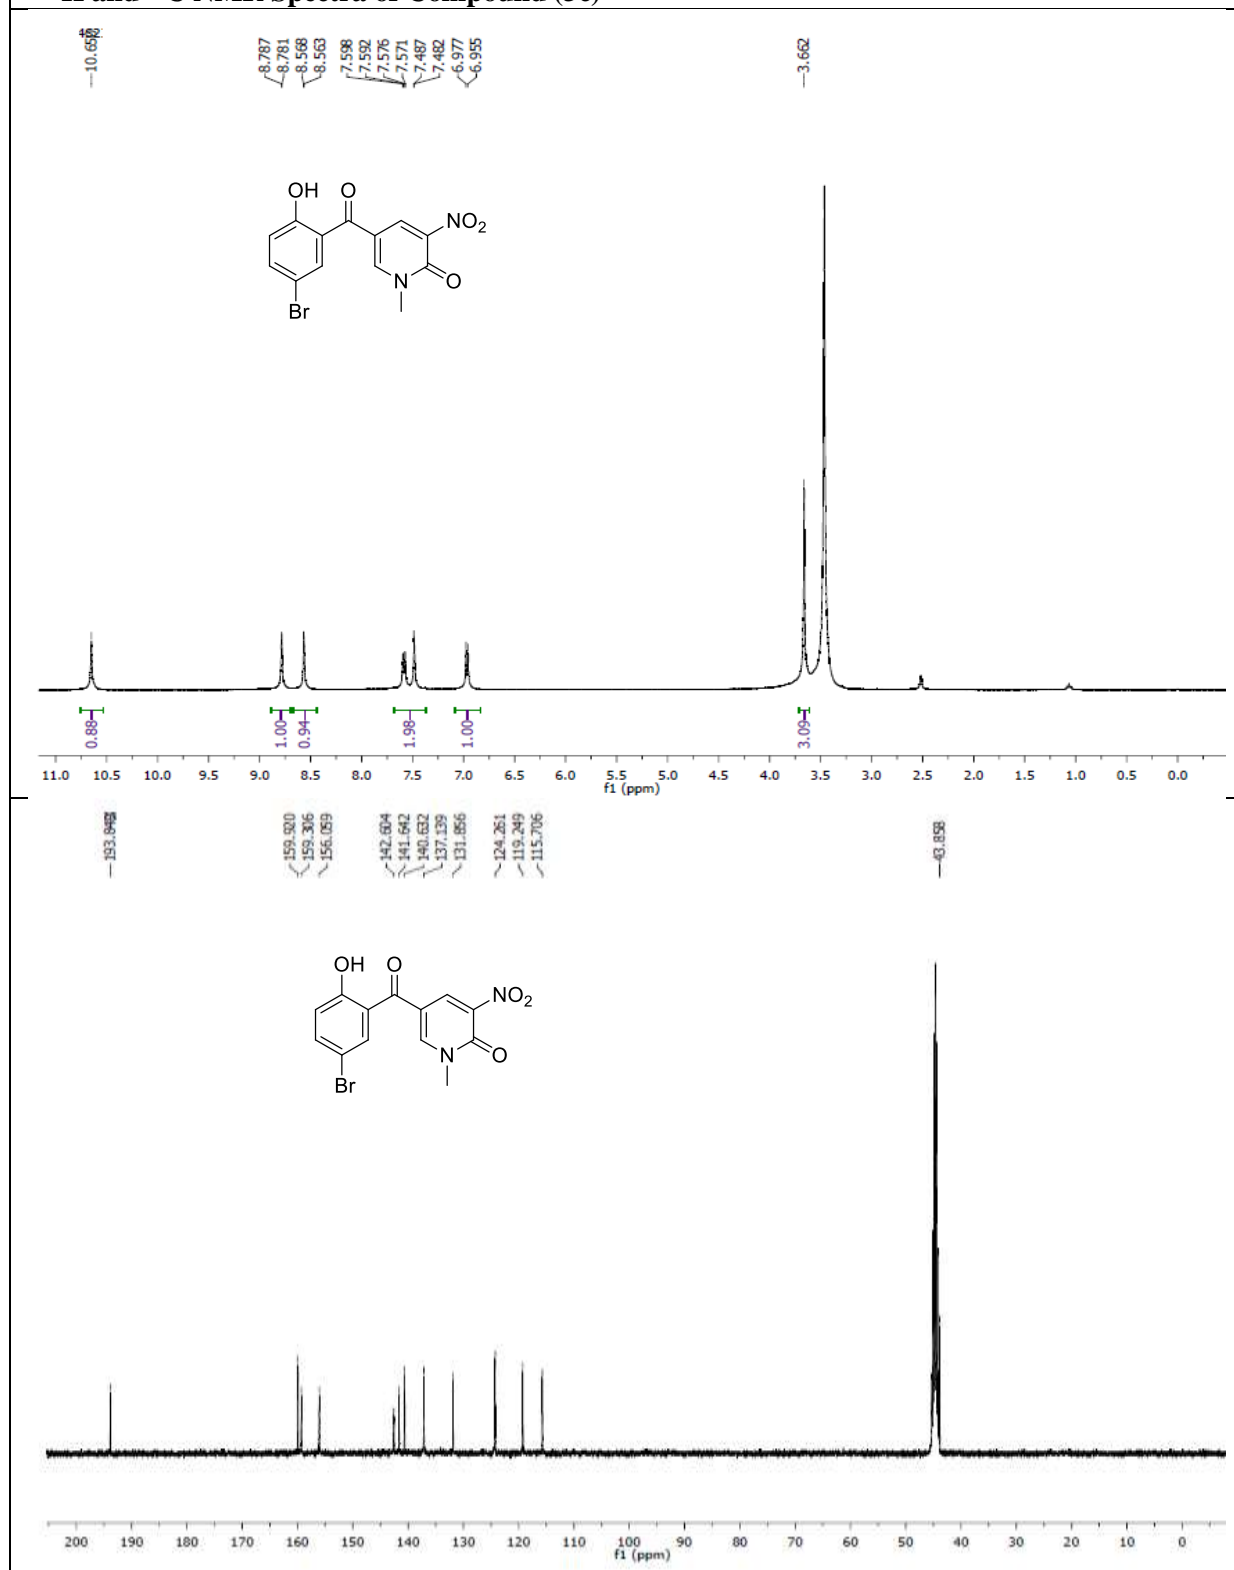

# <sup>1</sup>H and <sup>13</sup>C NMR Spectra of Compound (3d)

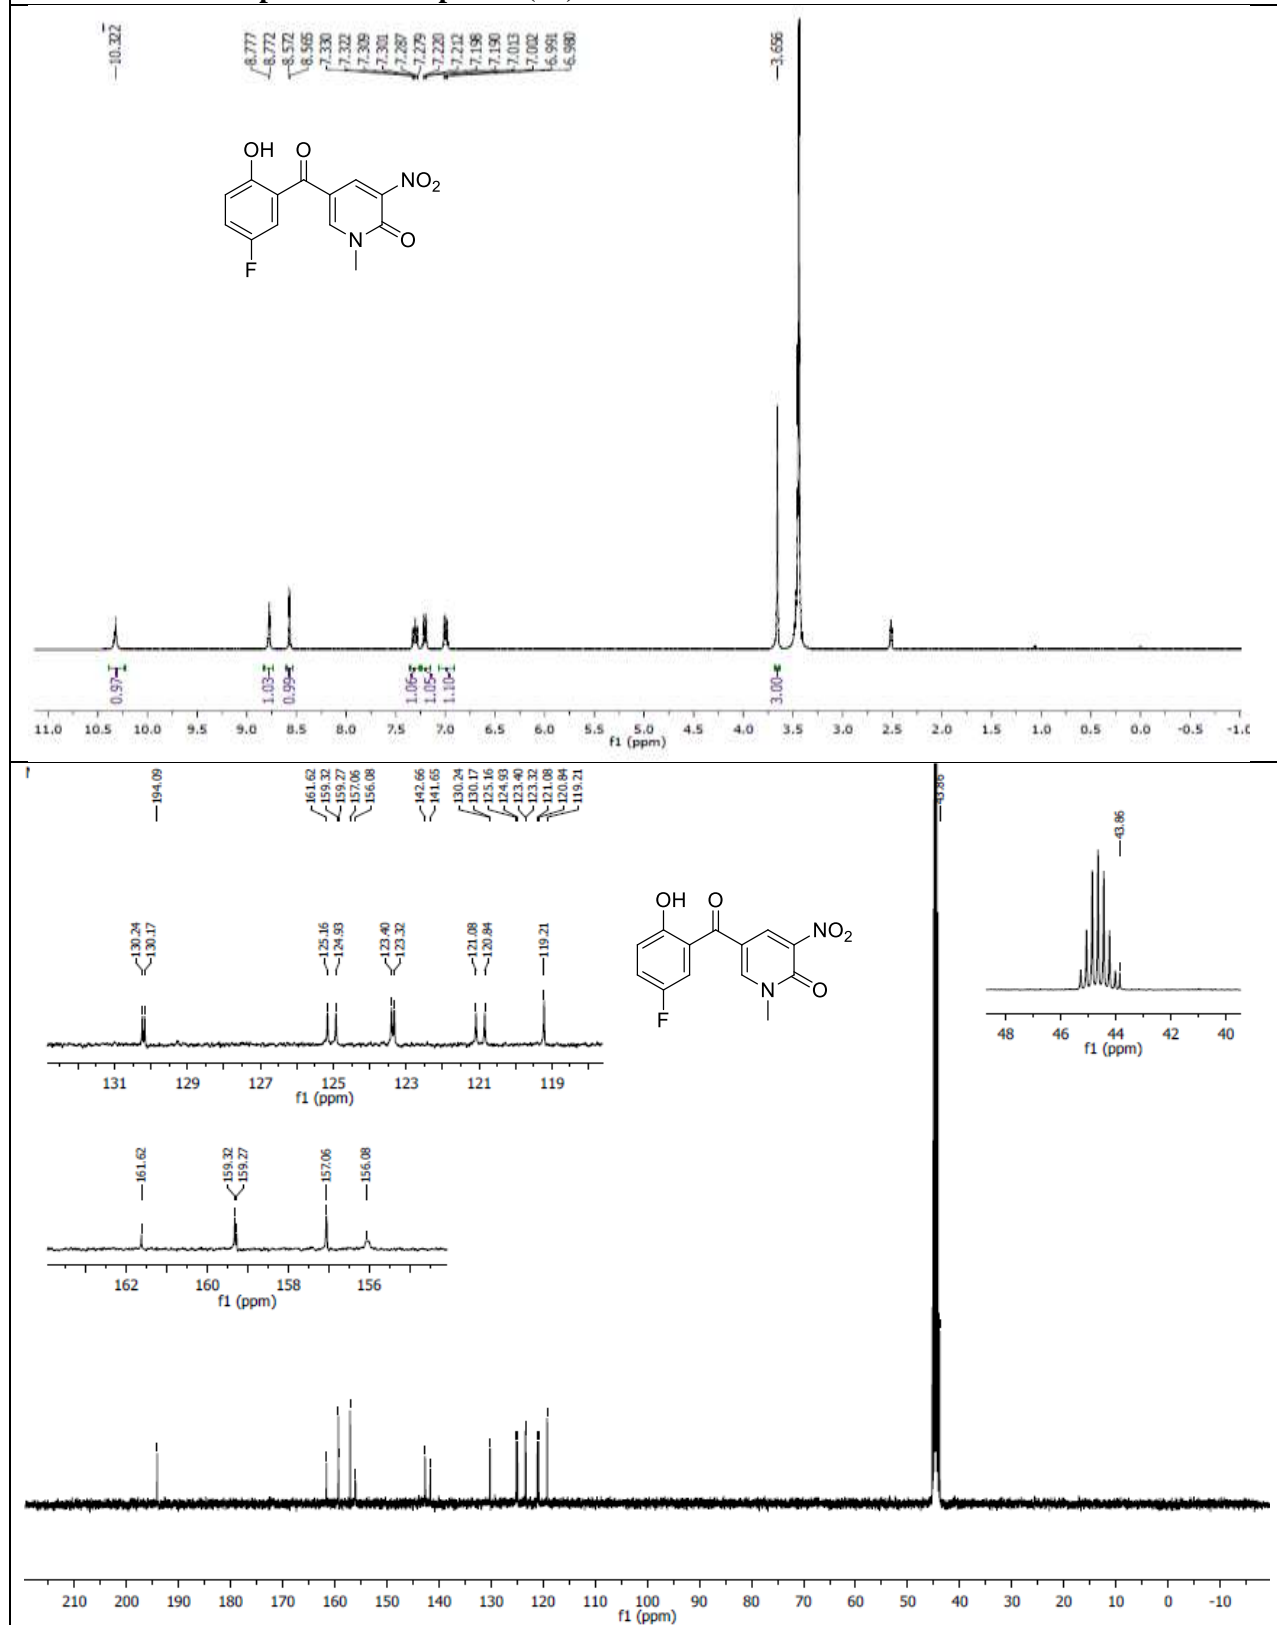



# <sup>1</sup>H and <sup>13</sup>C NMR Spectra of Compound (3e)

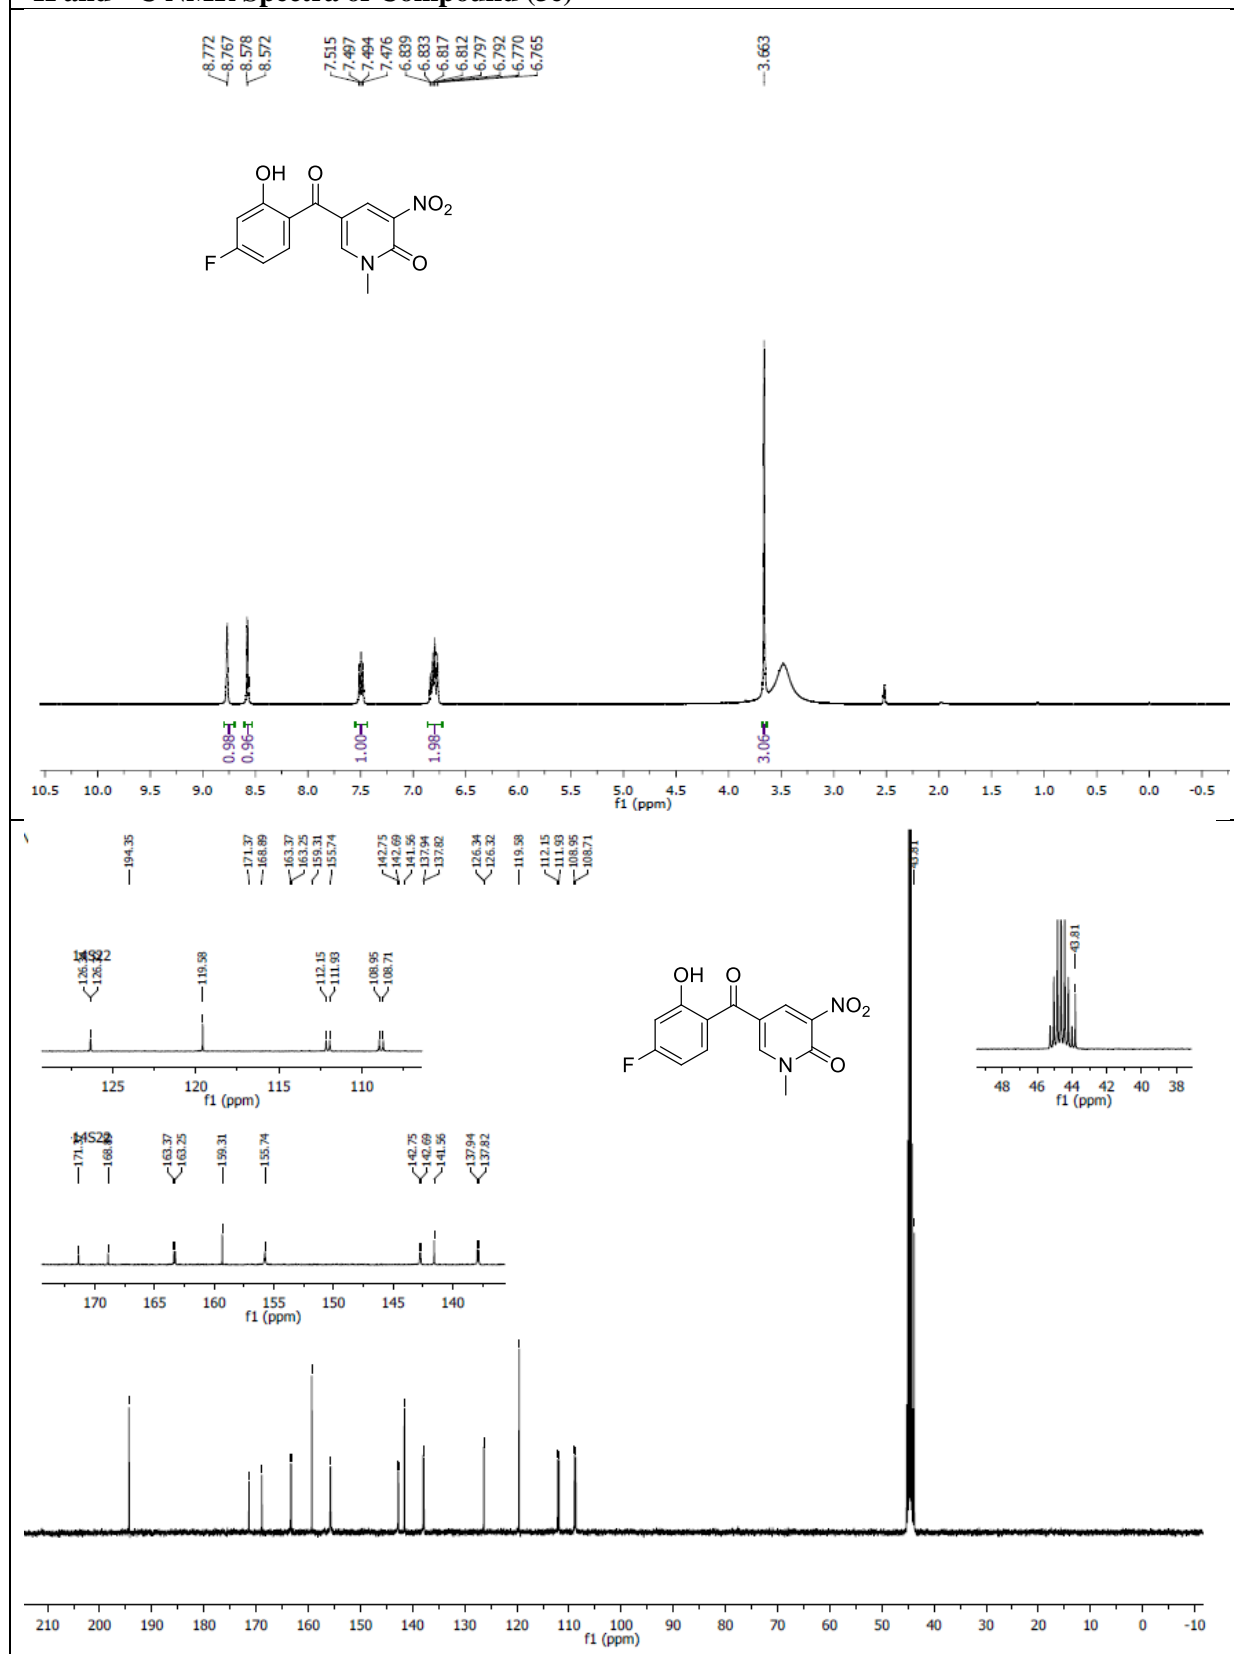

# <sup>1</sup>H and <sup>13</sup>C NMR Spectra of Compound (3f)

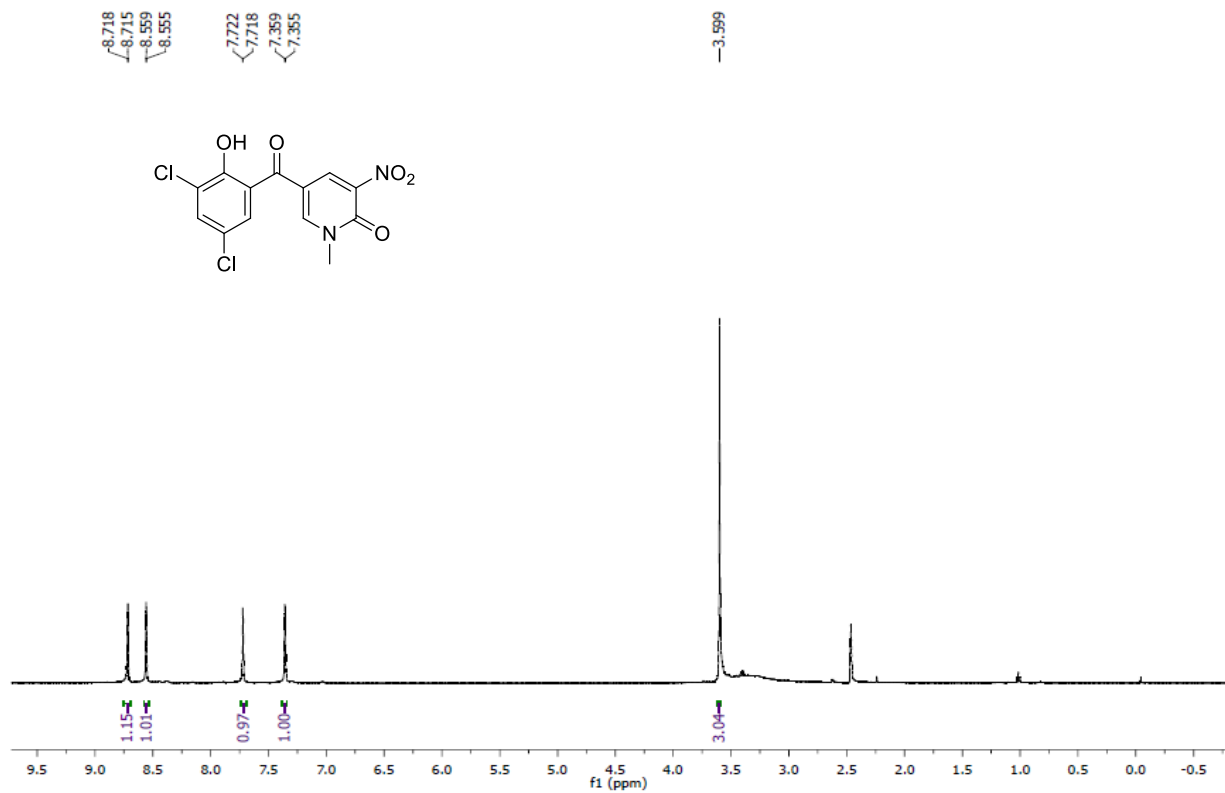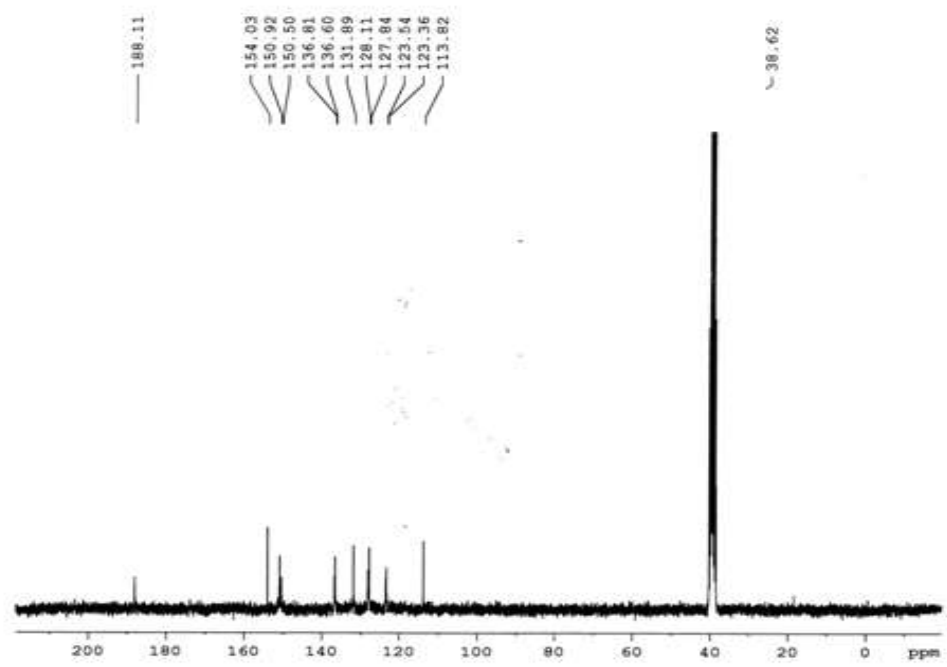

# <sup>1</sup>H and <sup>13</sup>C NMR Spectra of Compound (3g)

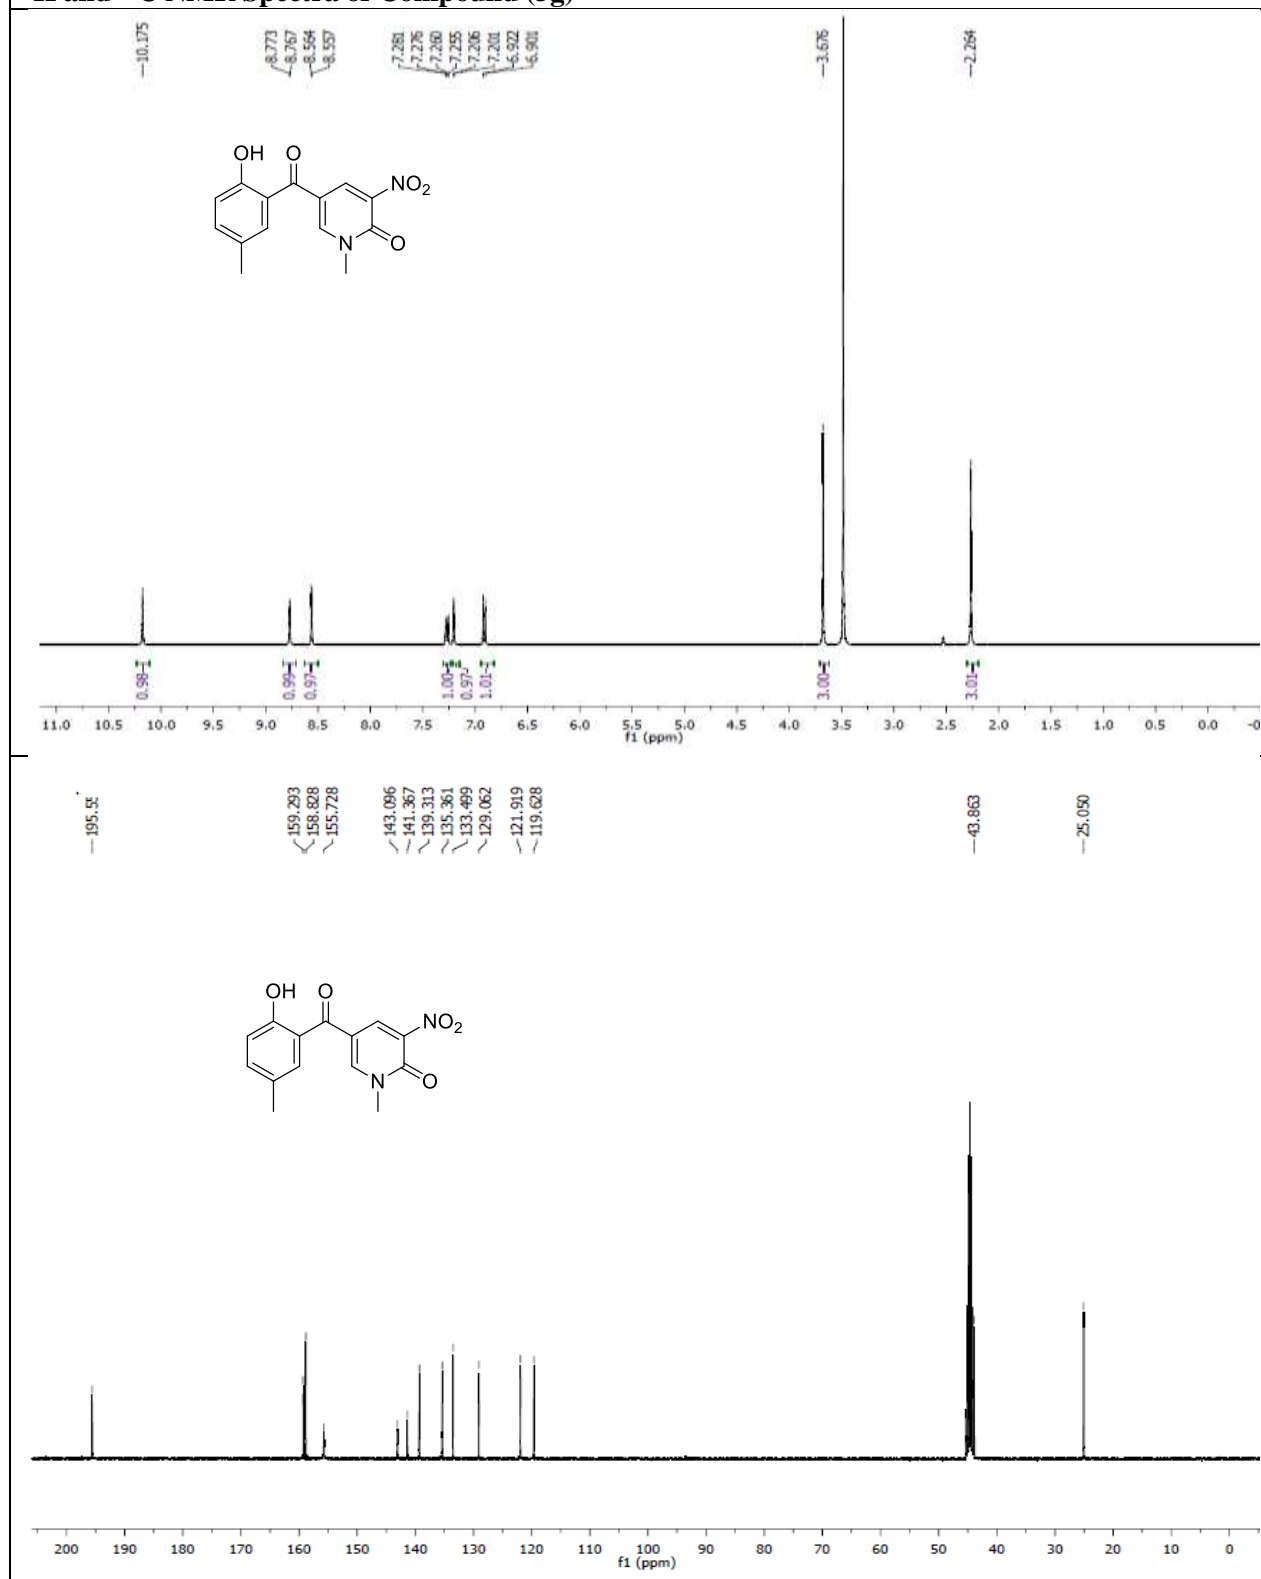

# <sup>1</sup>H and <sup>13</sup>C NMR Spectra of Compound (3h)

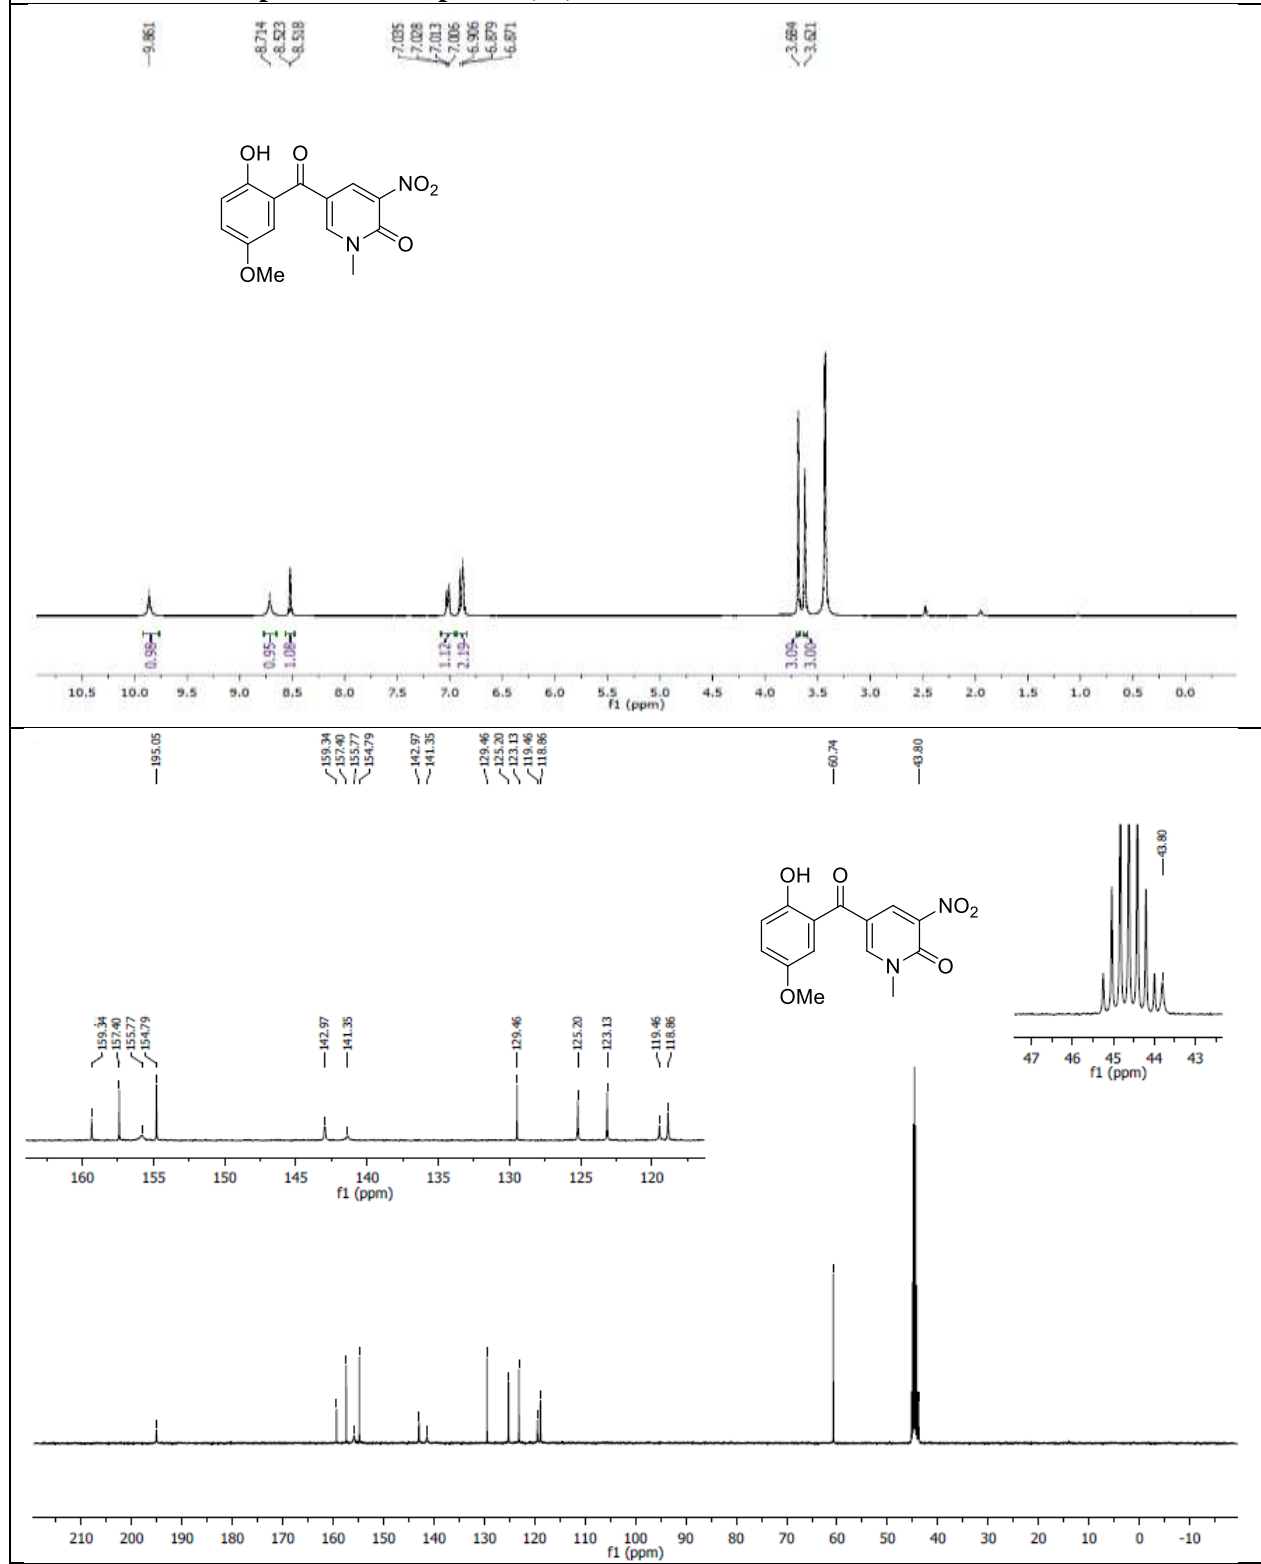

# <sup>1</sup>H and <sup>13</sup>C NMR Spectra of Compound (3i)

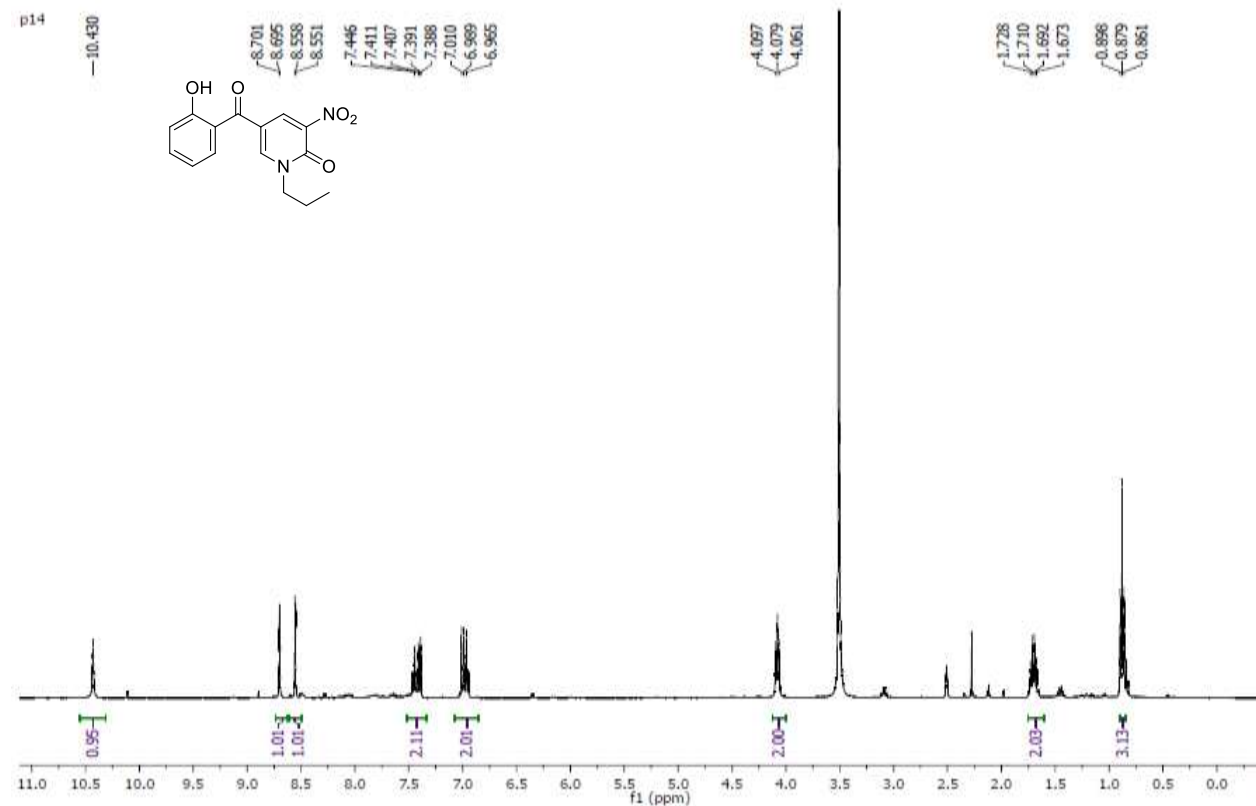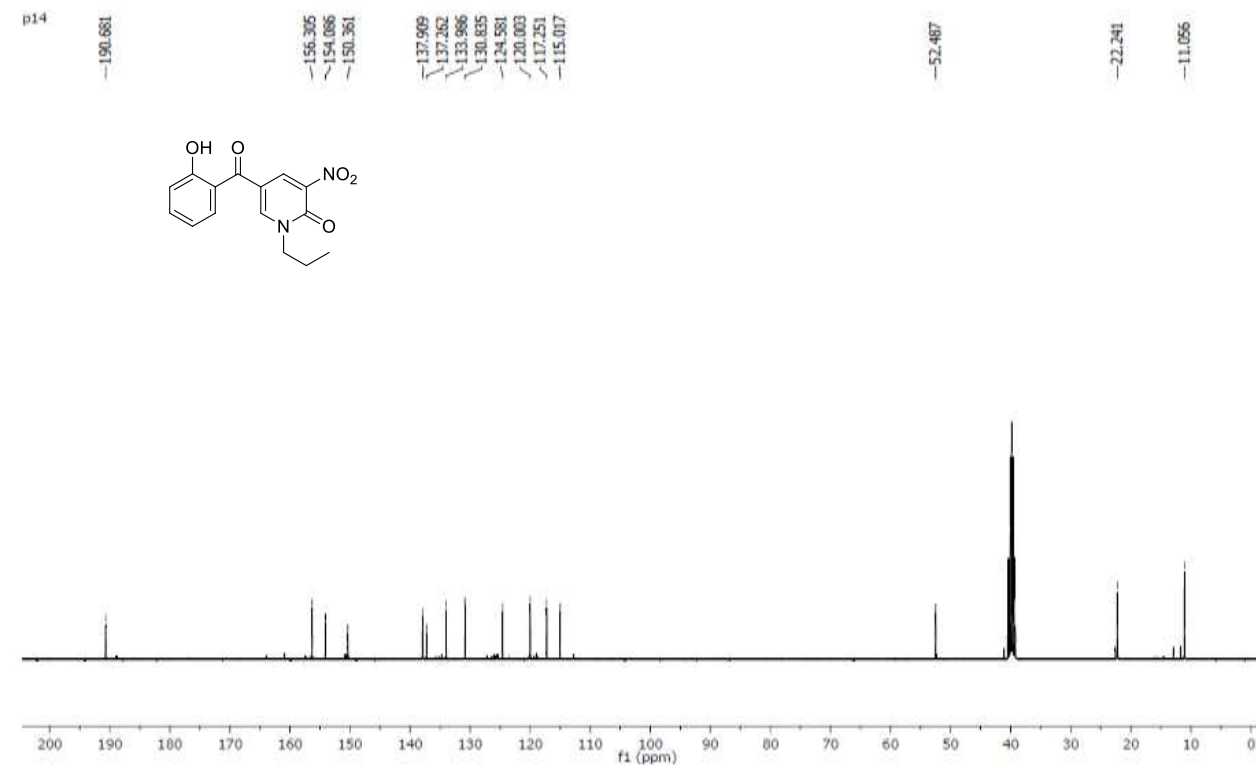

# <sup>1</sup>H and <sup>13</sup>C NMR Spectra of Compound (3j)

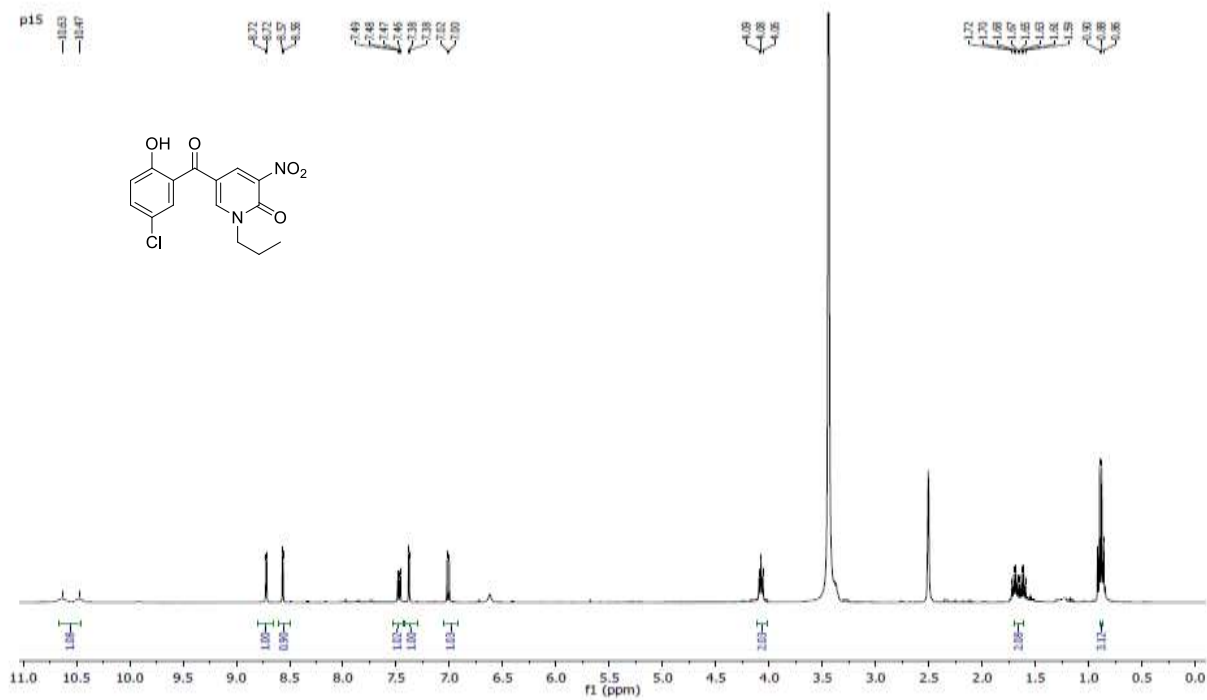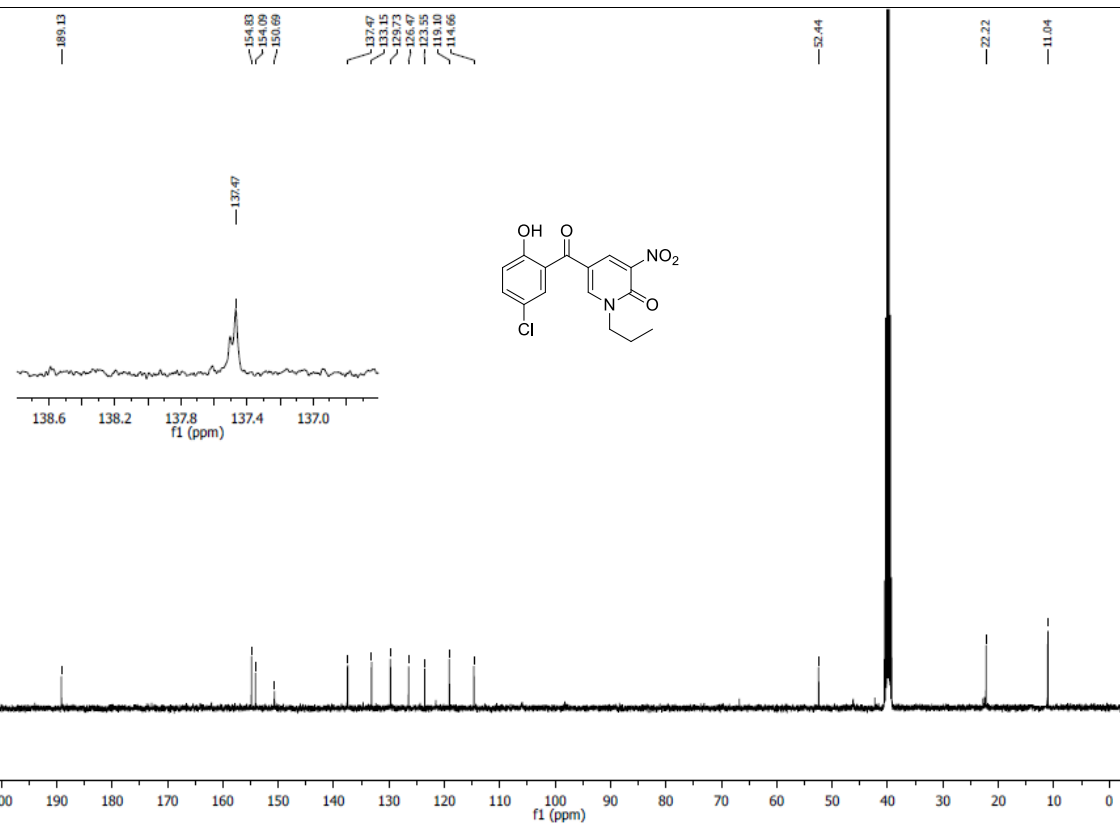

# <sup>1</sup>H and <sup>13</sup>C NMR Spectra of Compound (3k)

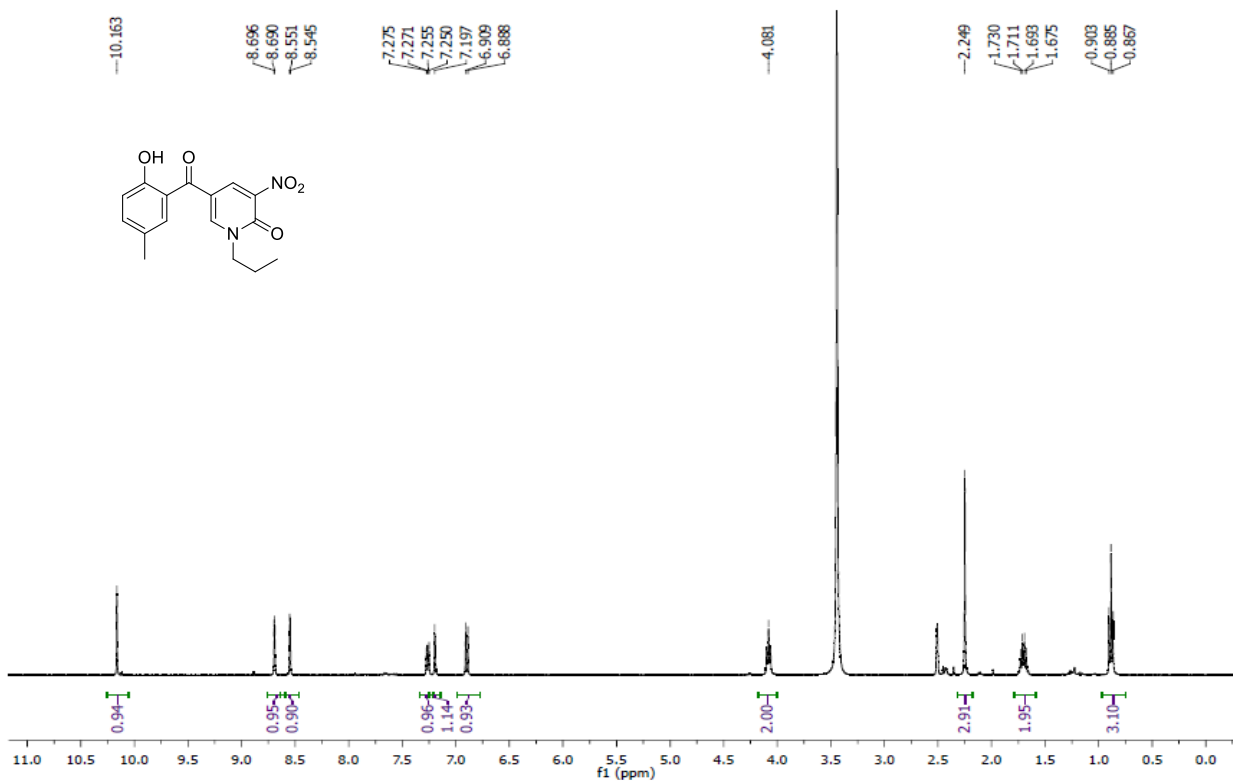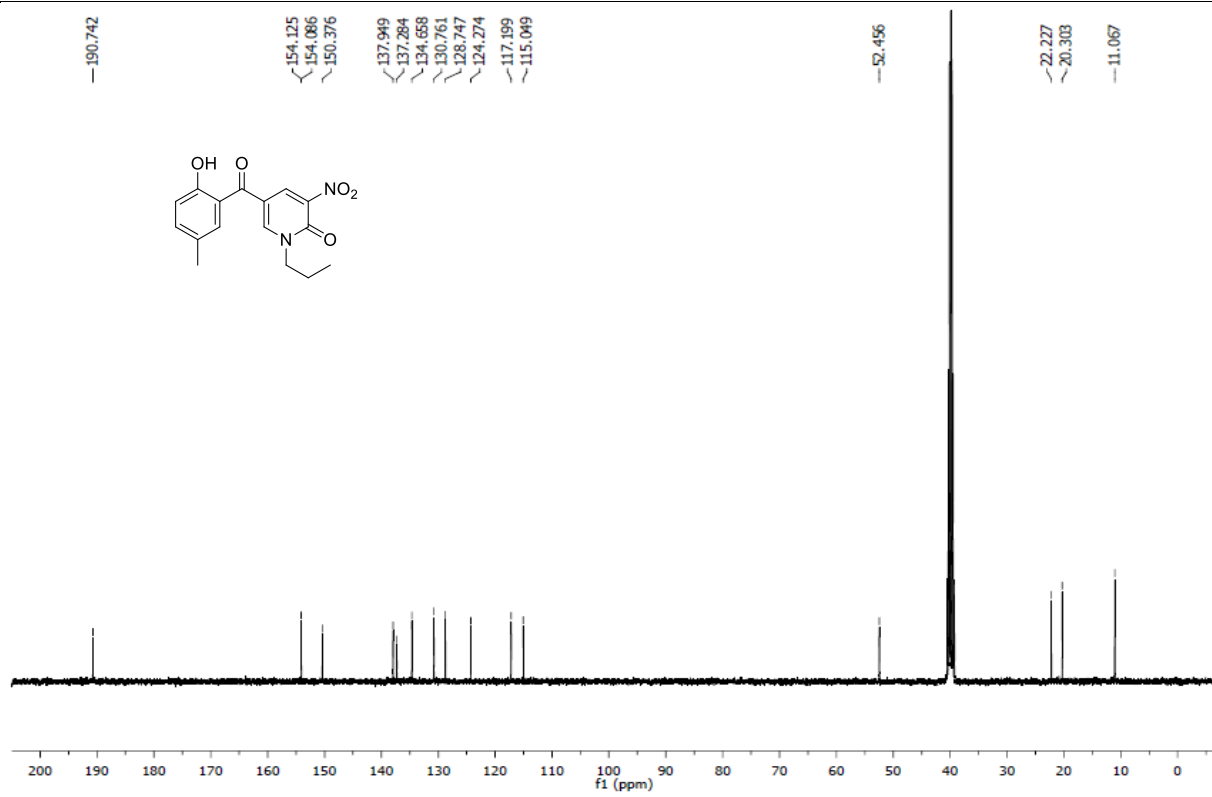

# <sup>1</sup>H and <sup>13</sup>C NMR Spectra of Compound (31)

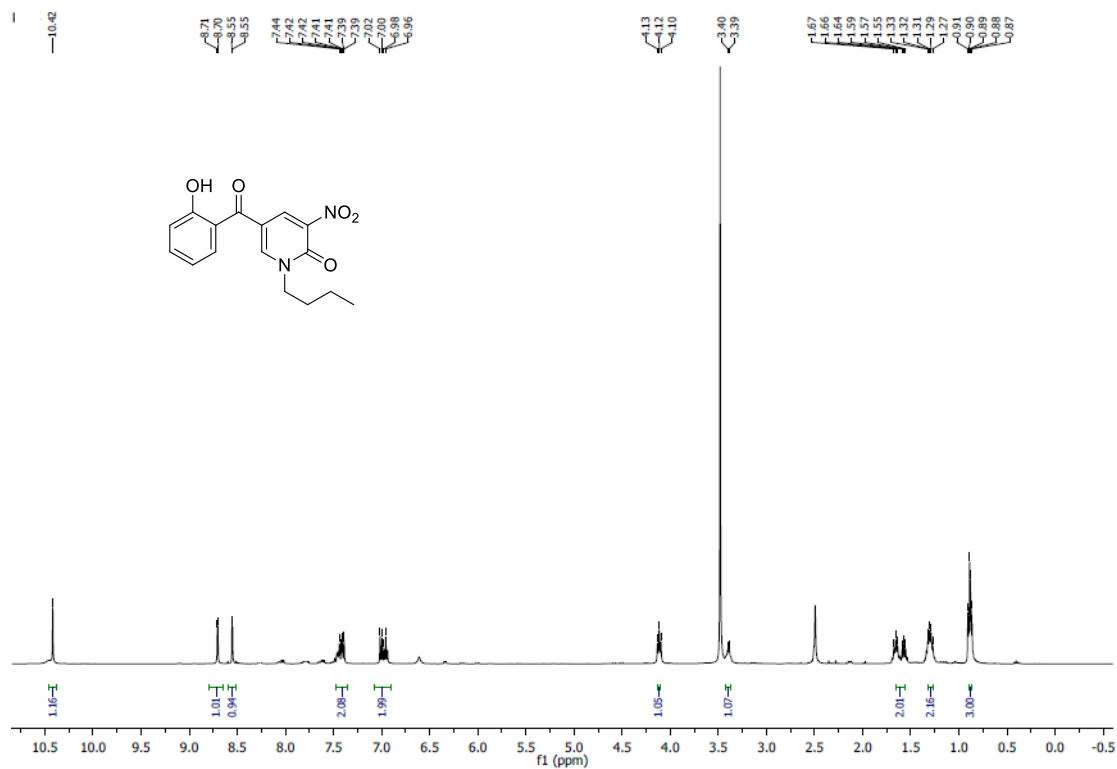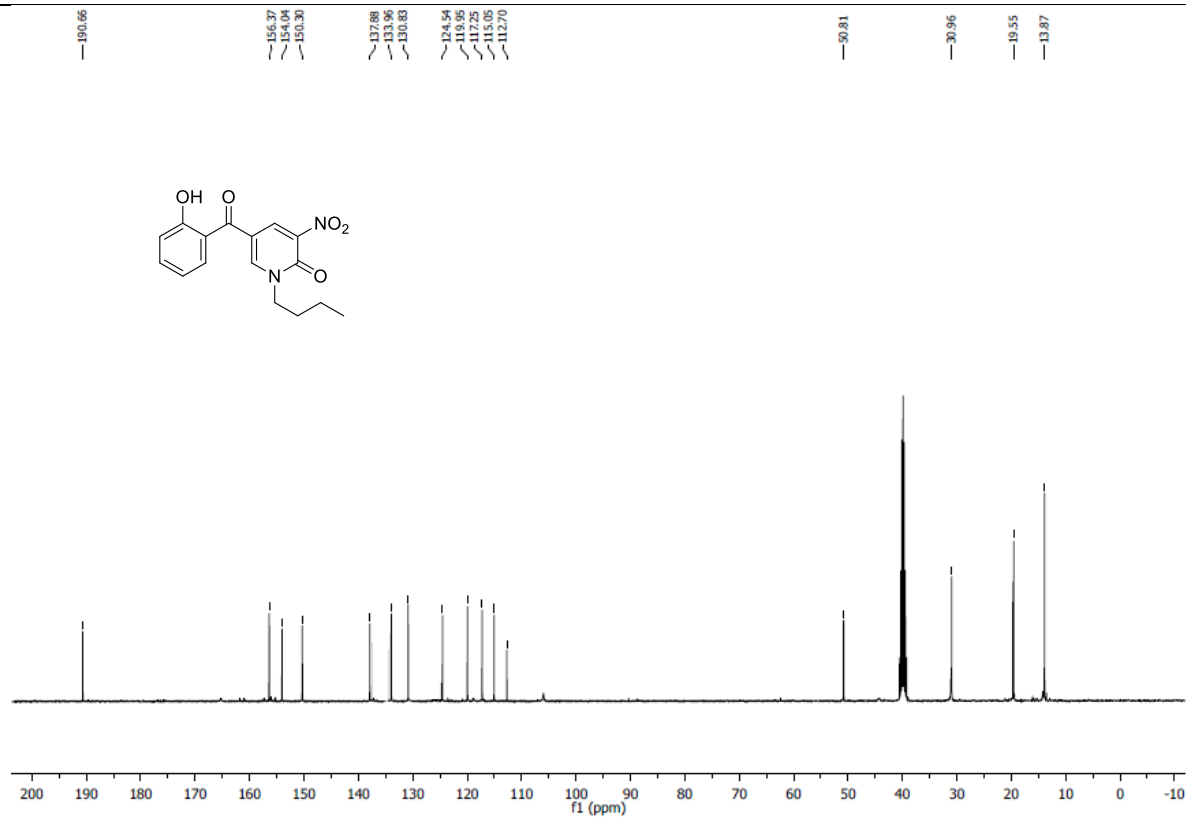



# <sup>1</sup>H and <sup>13</sup>C NMR Spectra of Compound (3m)

PP-13  
ORGANIC

10.51  
7.72  
7.72  
7.55  
7.49  
7.48  
7.47  
7.46  
7.38  
7.38  
7.03  
7.01

4.13  
4.11  
4.10

1.69  
1.65  
1.64  
1.62  
1.53  
1.51  
1.29  
1.28  
1.00  
0.98

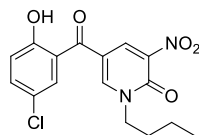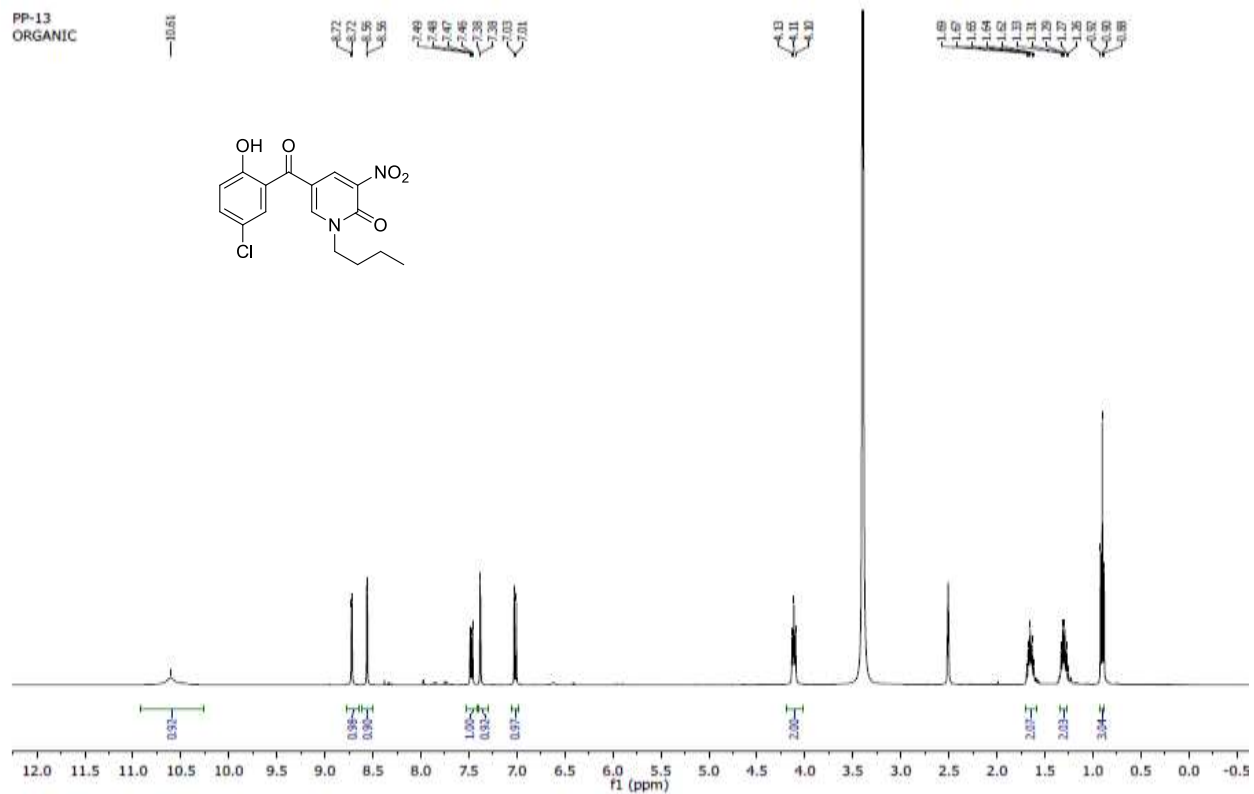

189.11  
154.86  
154.07  
150.60  
137.51  
137.43  
133.15  
129.78  
129.66  
125.94  
119.11  
114.00

50.77

30.94  
19.52  
13.92

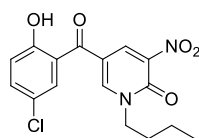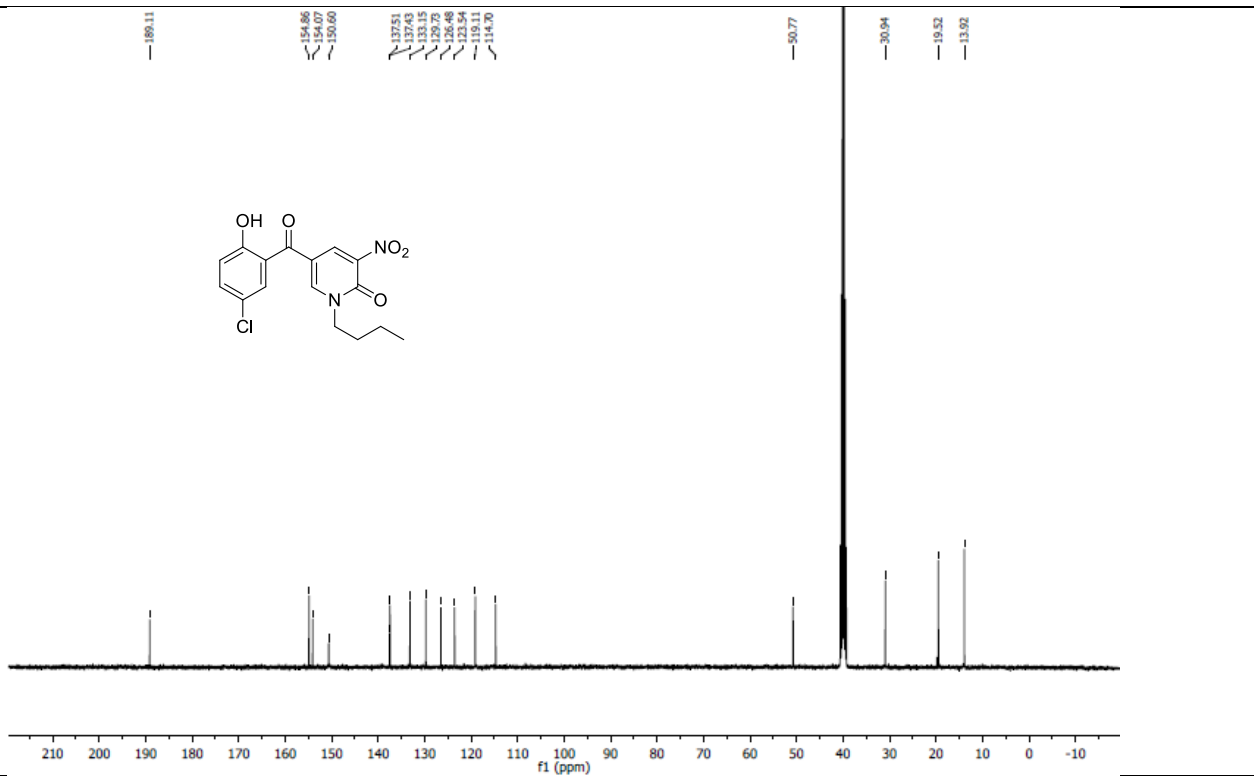

# <sup>1</sup>H and <sup>13</sup>C NMR Spectra of Compound (3n)

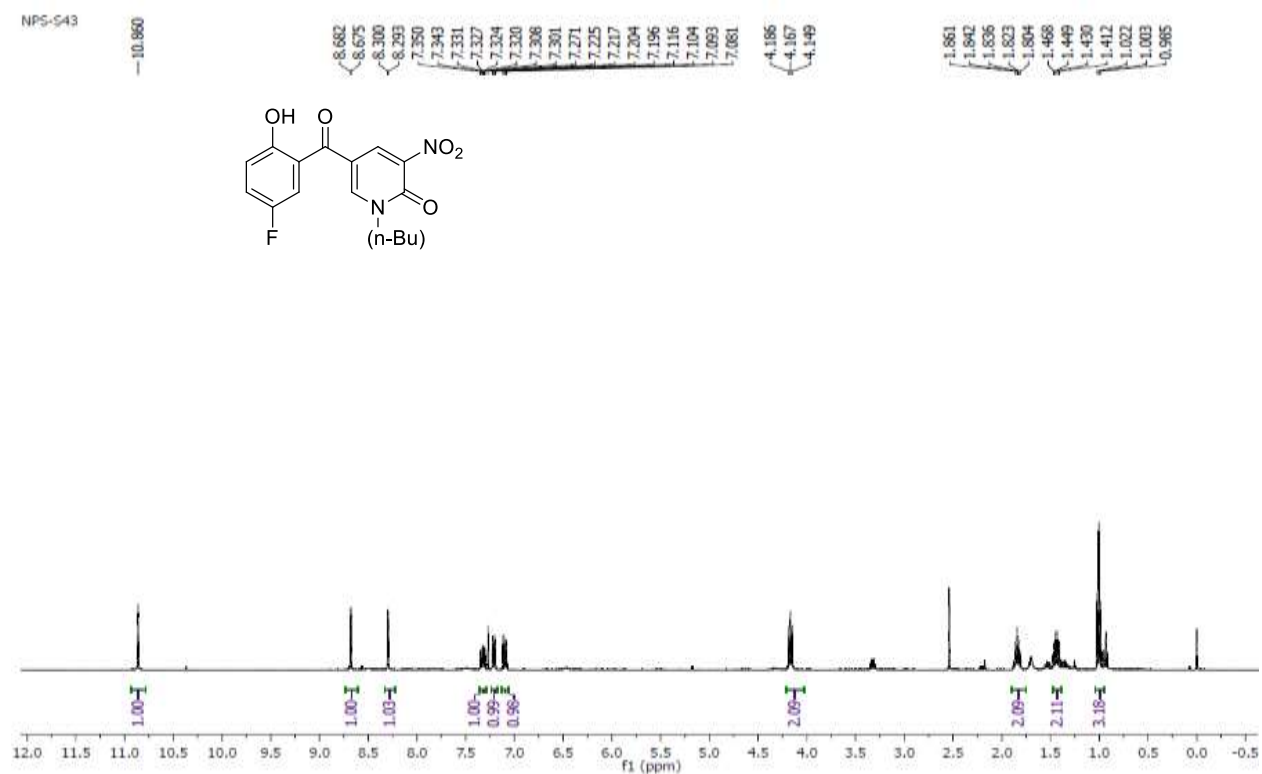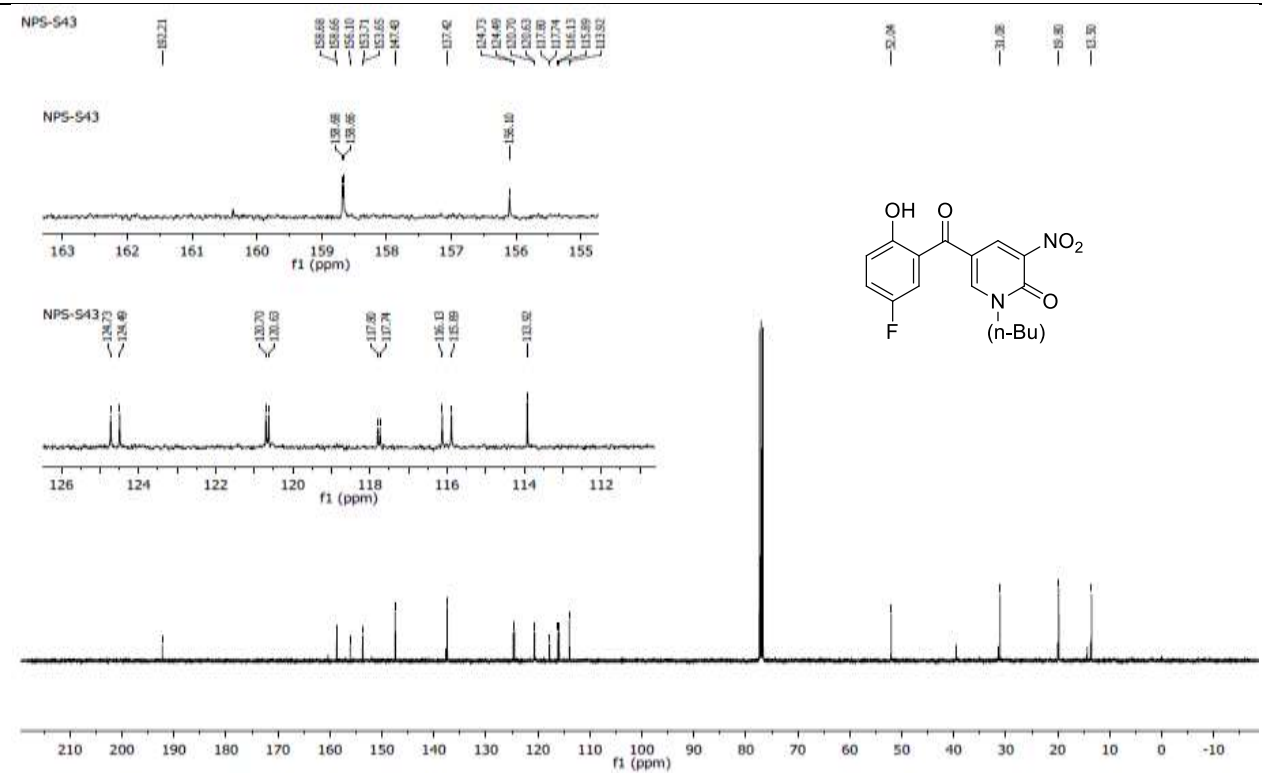

# <sup>1</sup>H and <sup>13</sup>C NMR Spectra of Compound (3o)

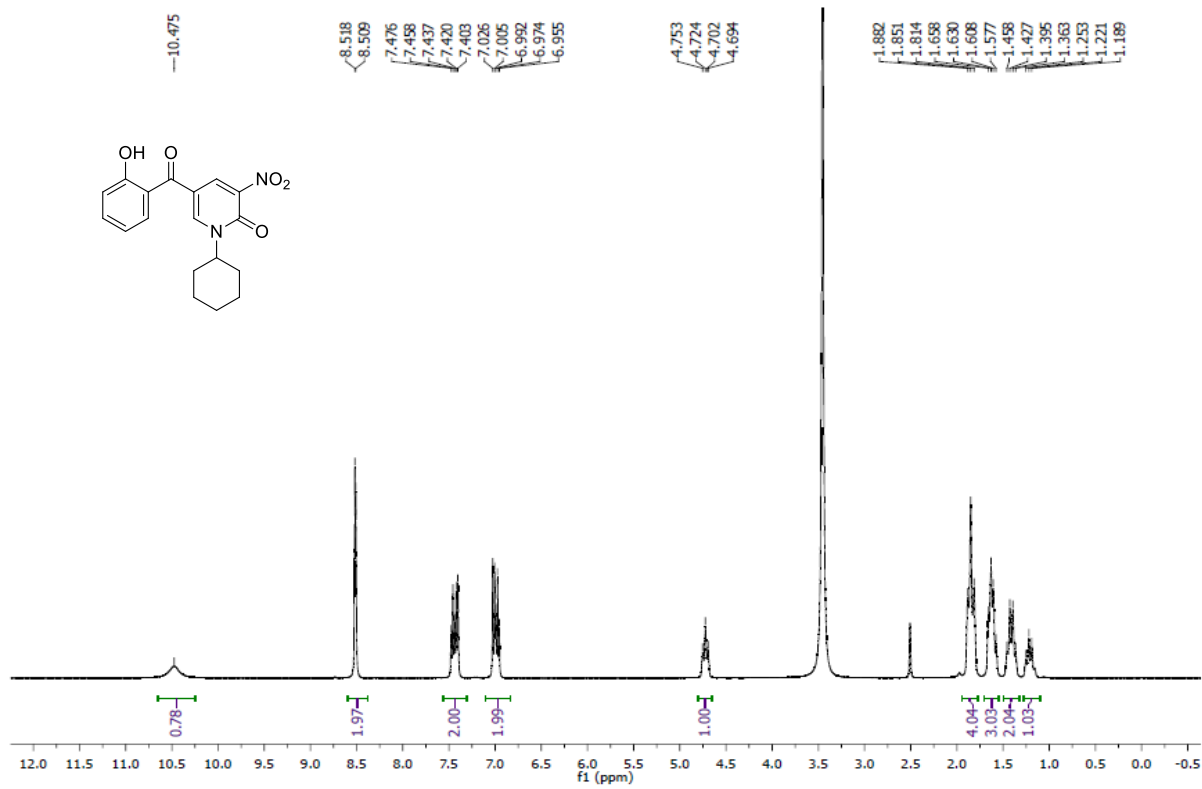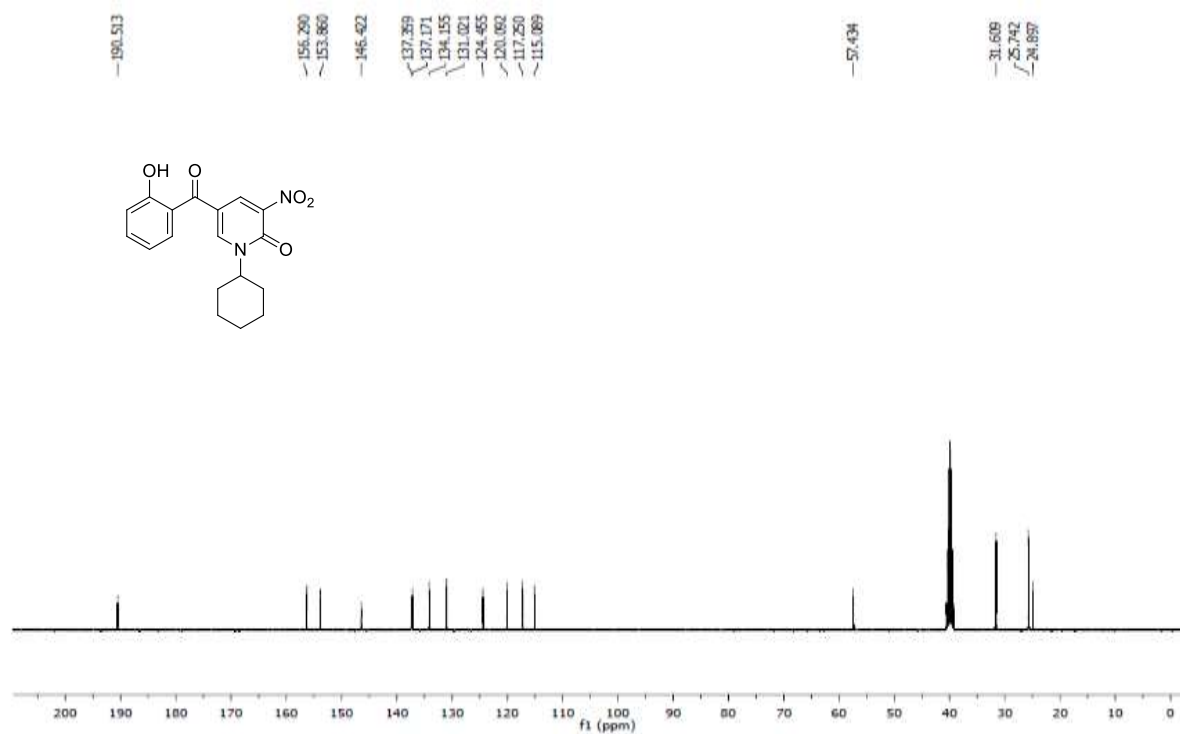

# <sup>1</sup>H and <sup>13</sup>C NMR Spectra of Compound (3p)

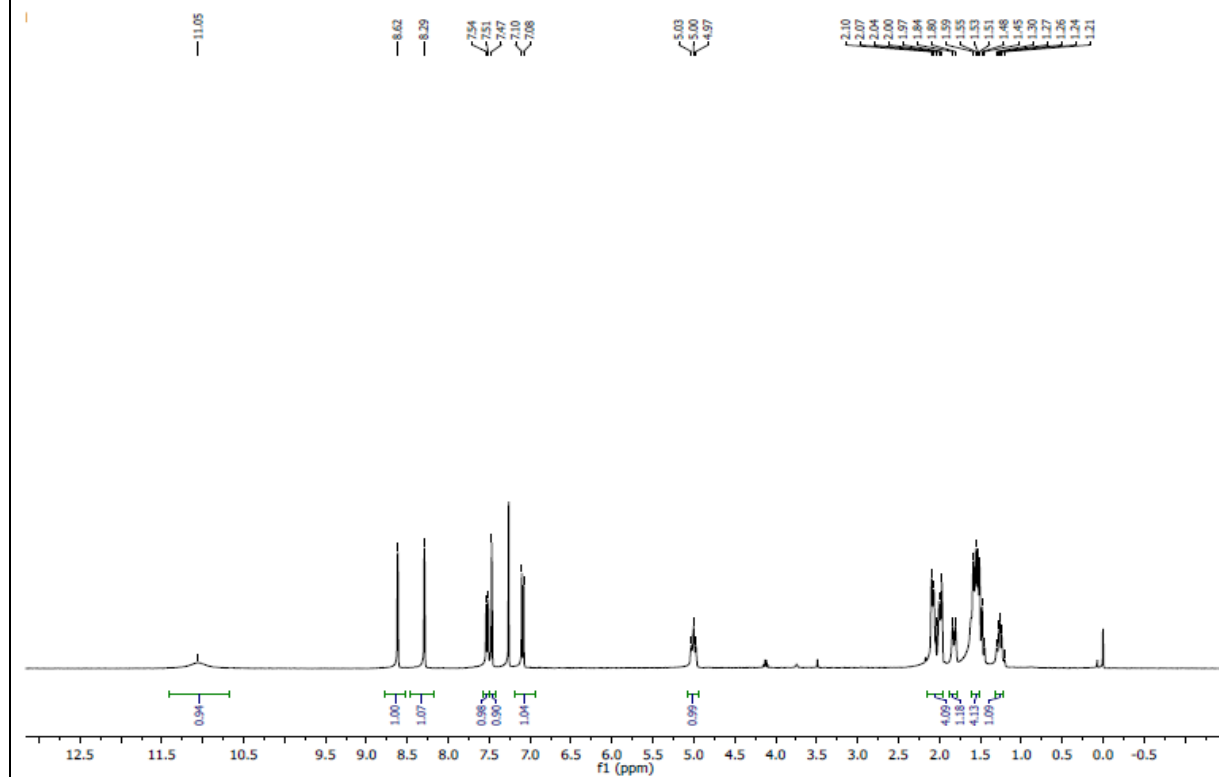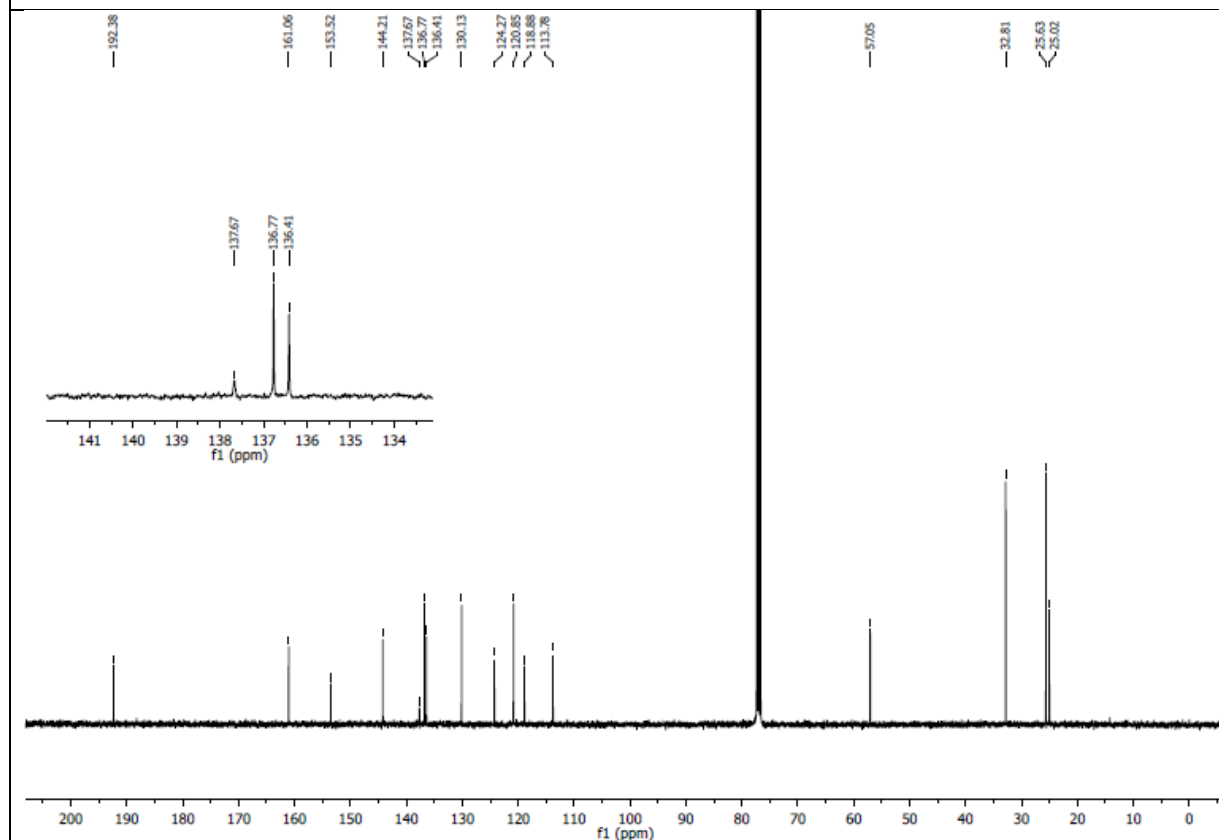

# <sup>1</sup>H and <sup>13</sup>C NMR Spectra of Compound (3q)

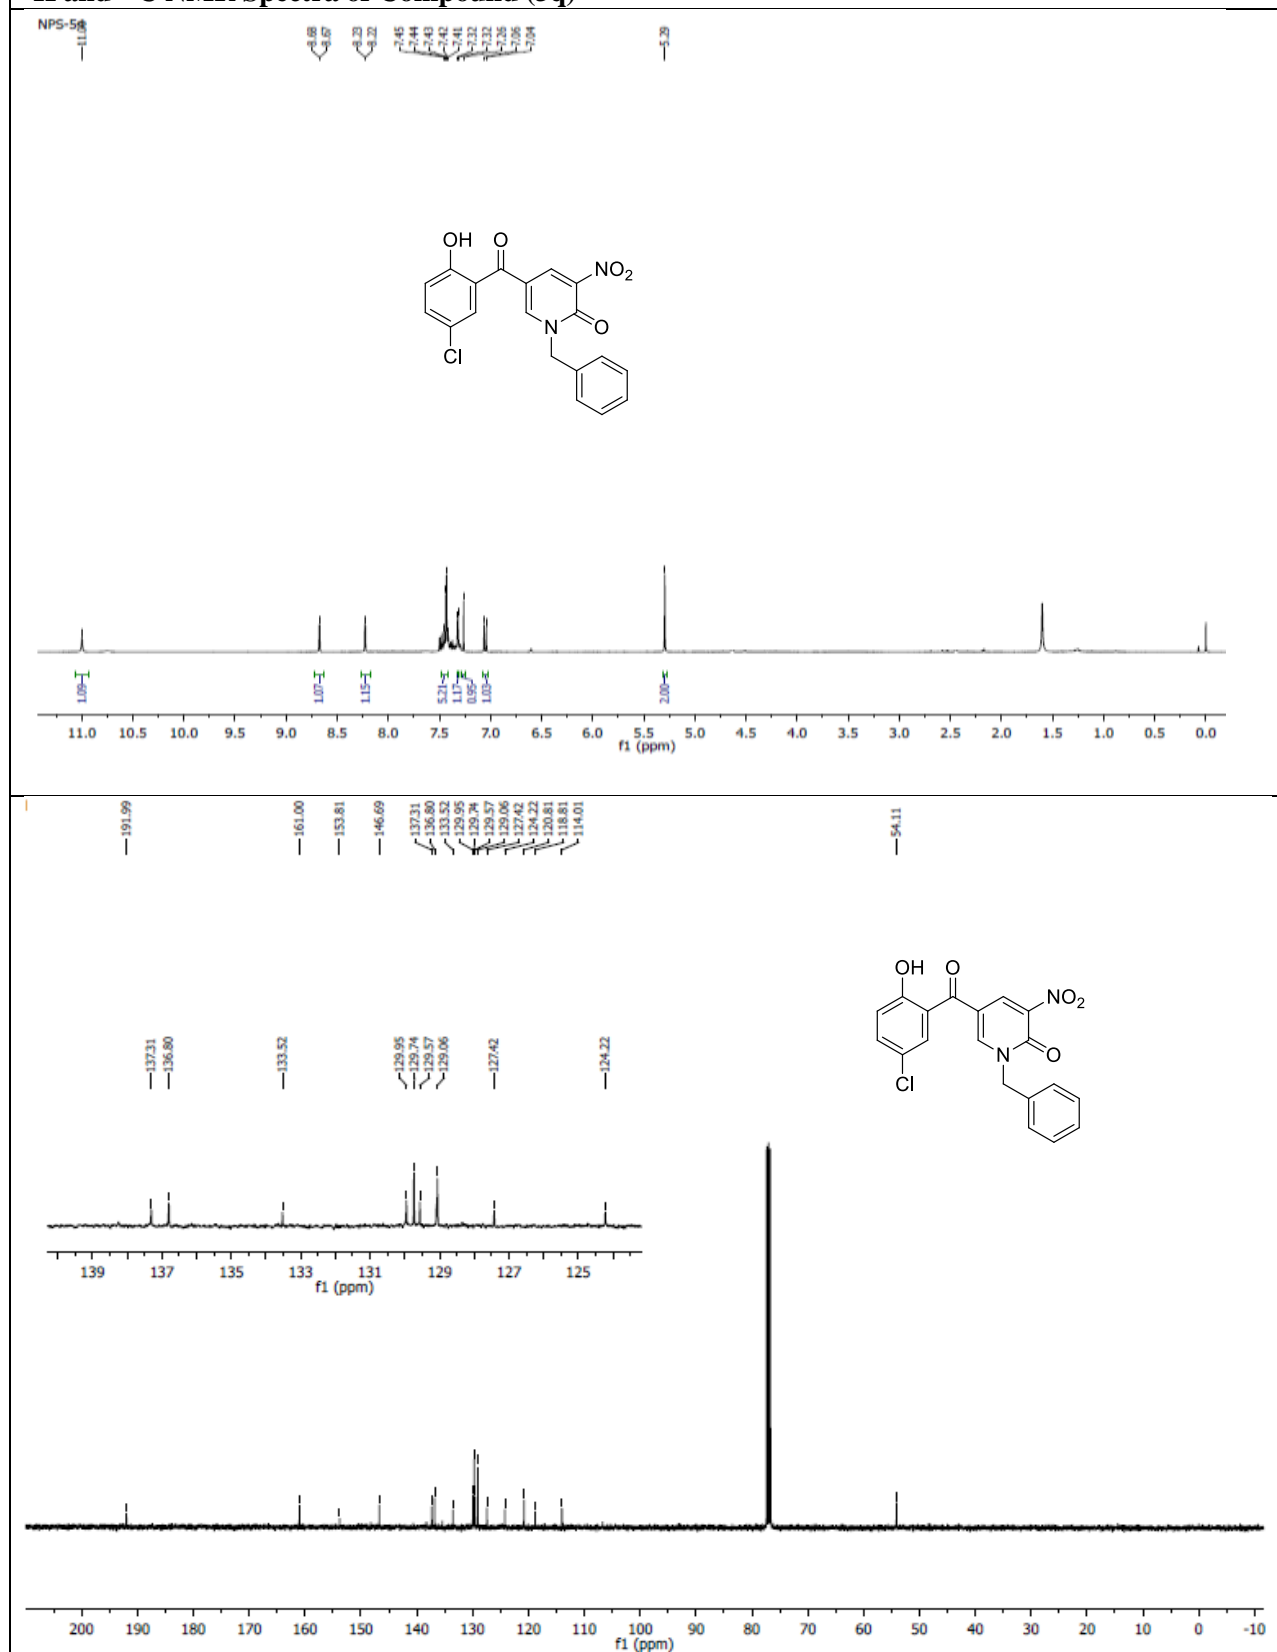

# <sup>1</sup>H and <sup>13</sup>C NMR Spectra of Compound (3r)

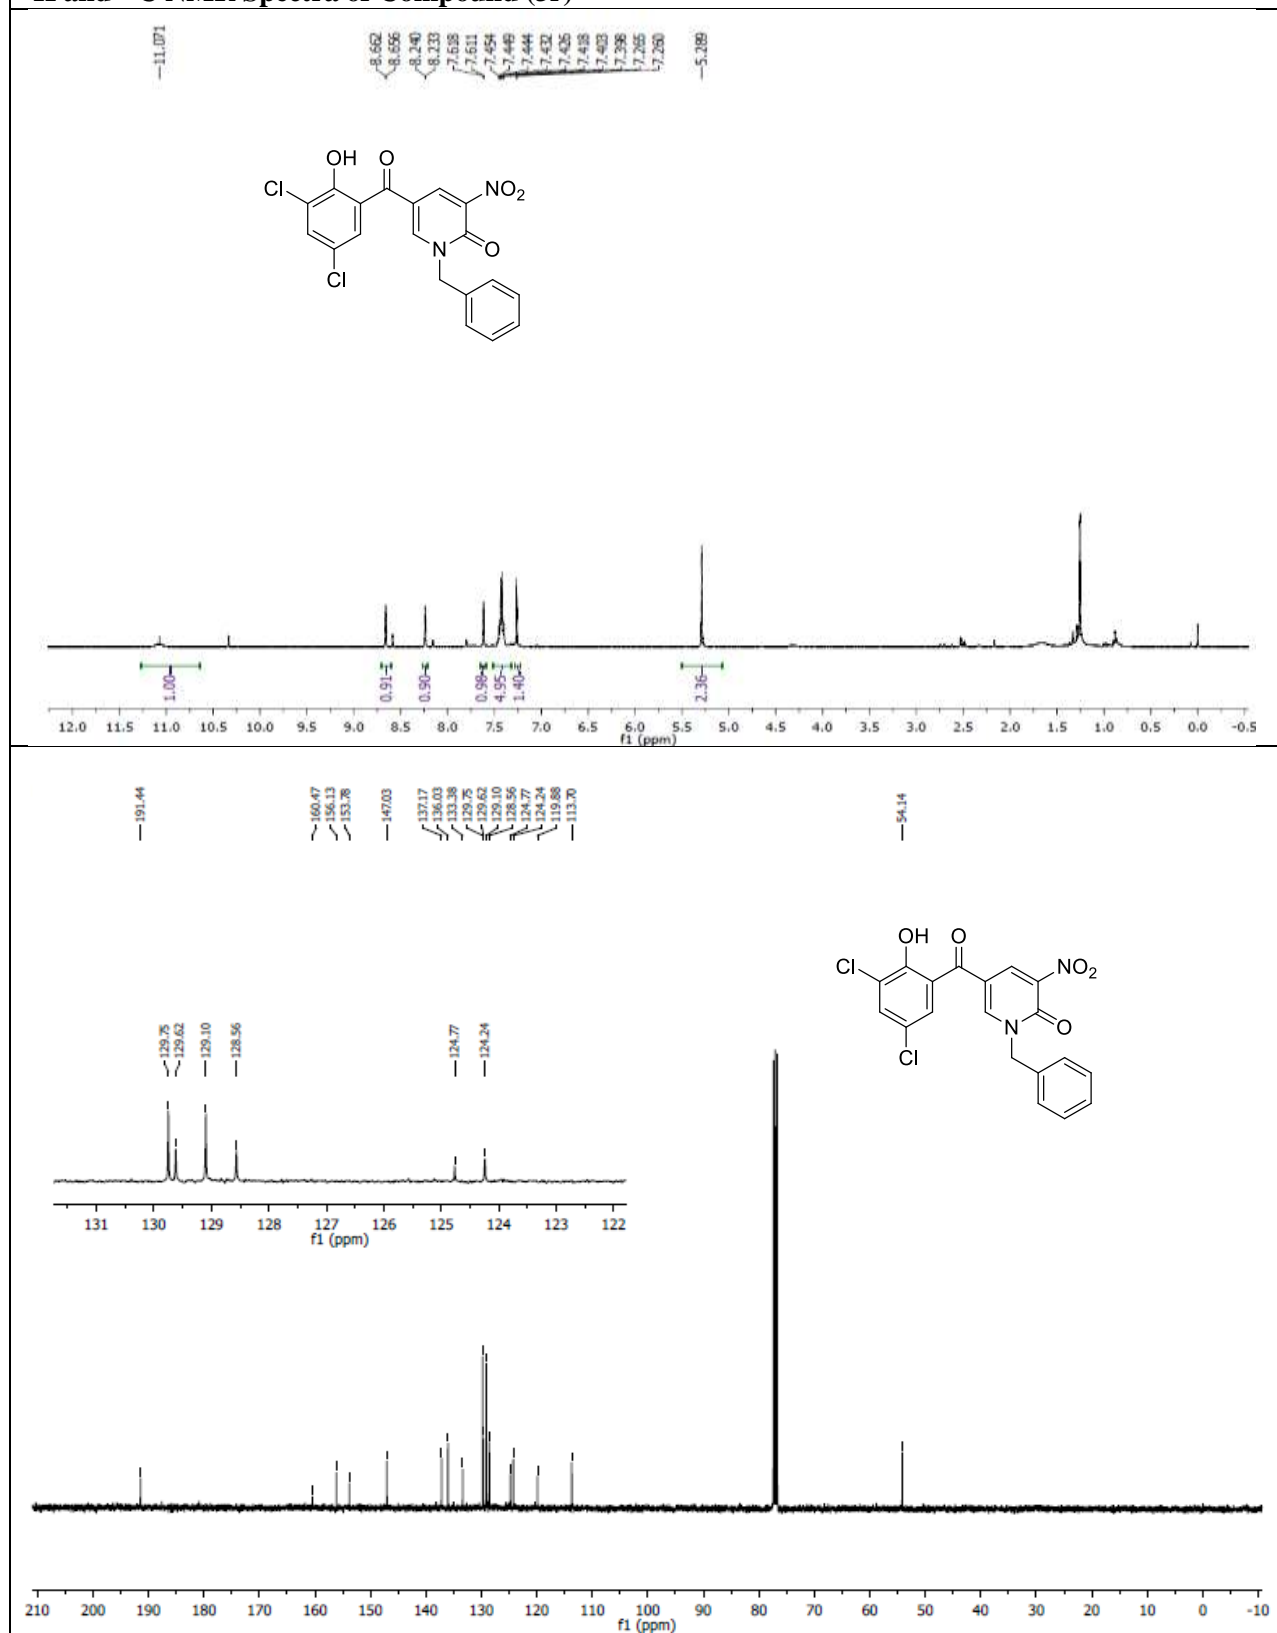

# <sup>1</sup>H and <sup>13</sup>C NMR Spectra of Compound (3s)

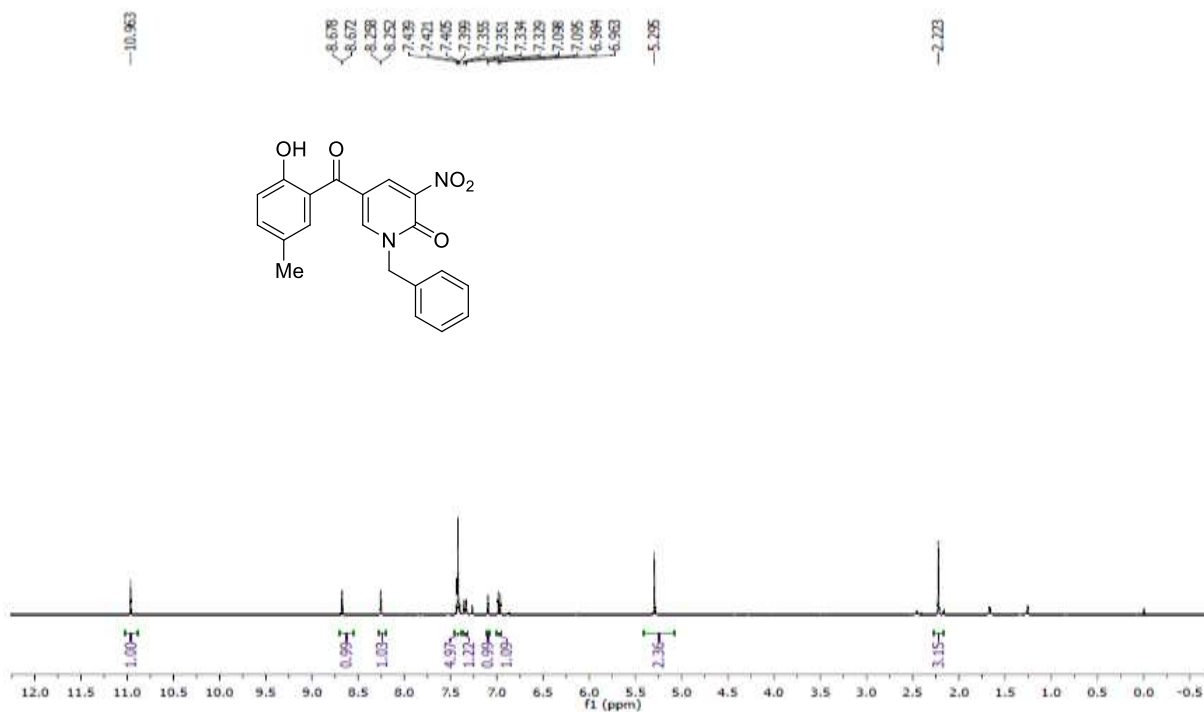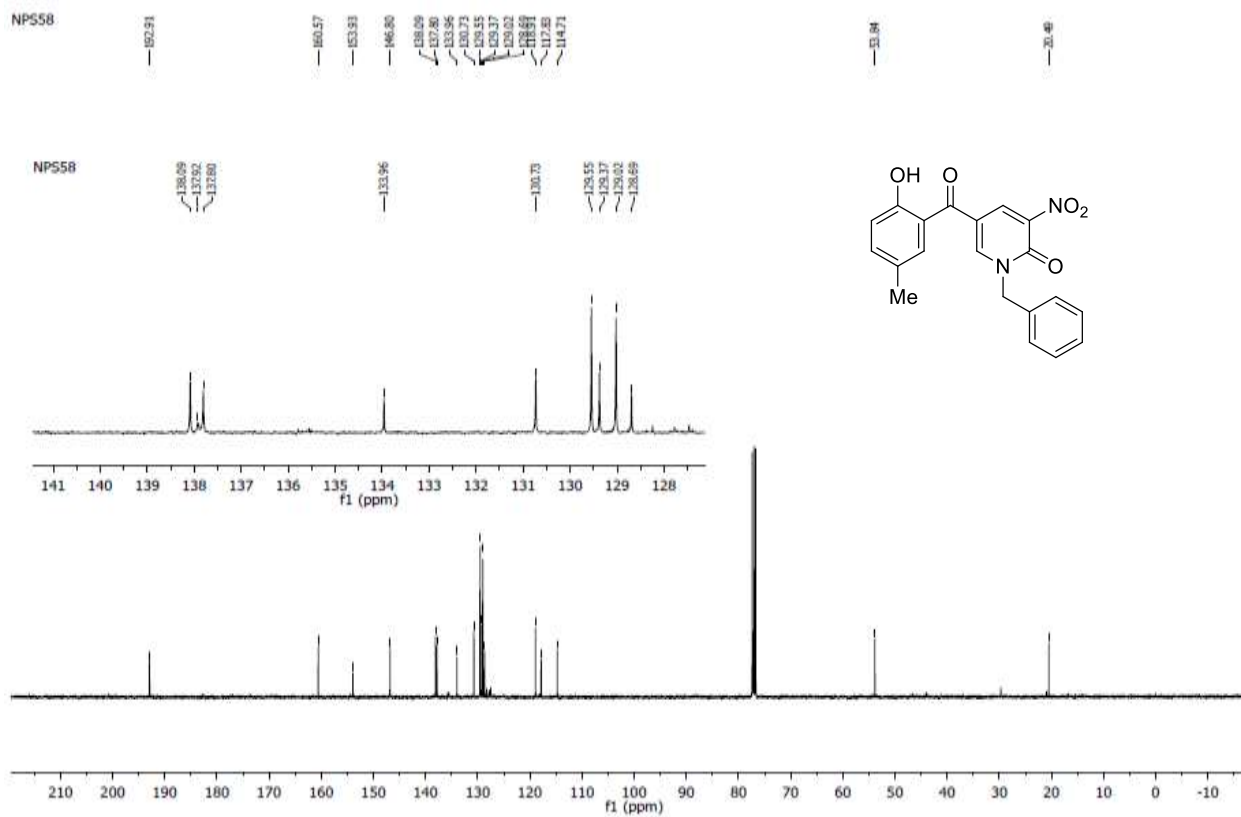

# <sup>1</sup>H and <sup>13</sup>C NMR Spectra of Compound (5a)

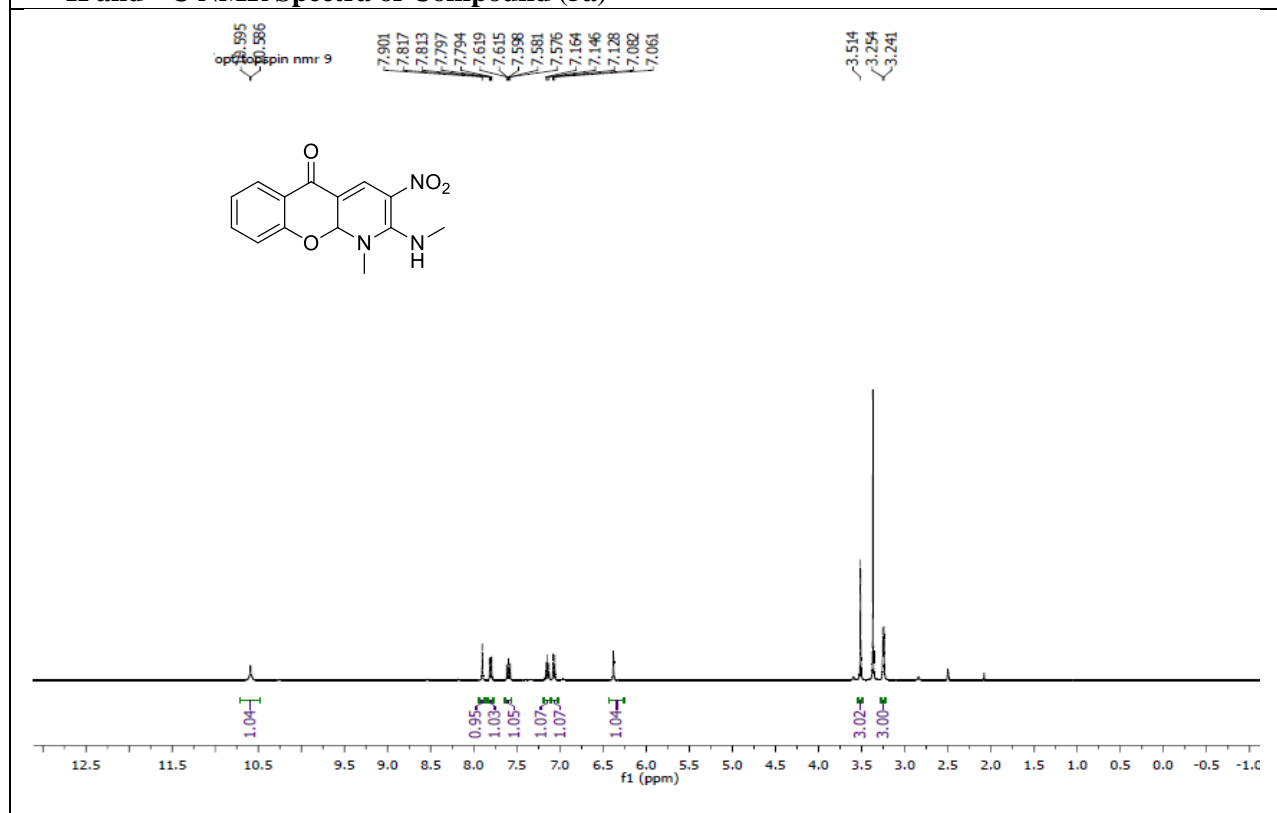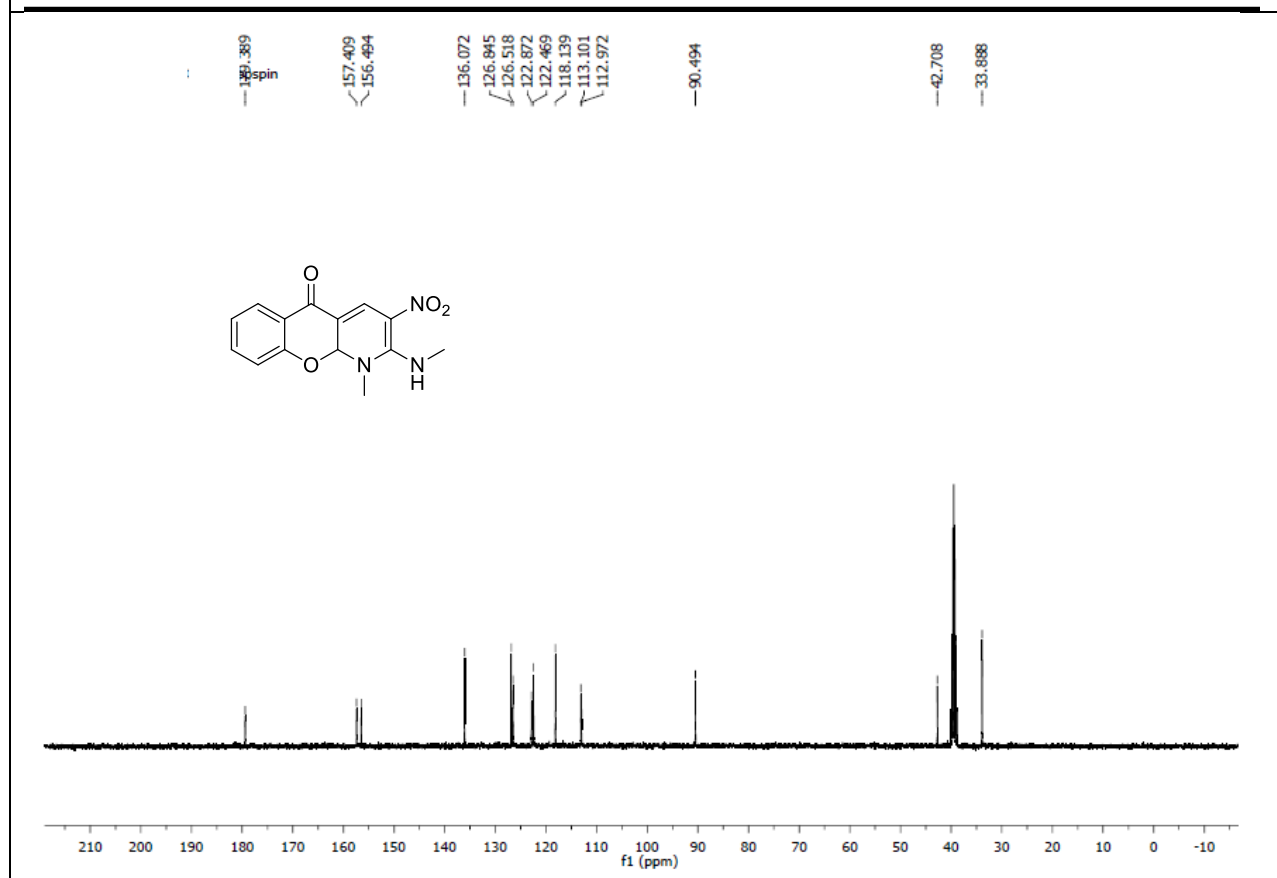



# <sup>1</sup>H and <sup>13</sup>C NMR Spectra of Compound (5b)

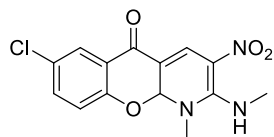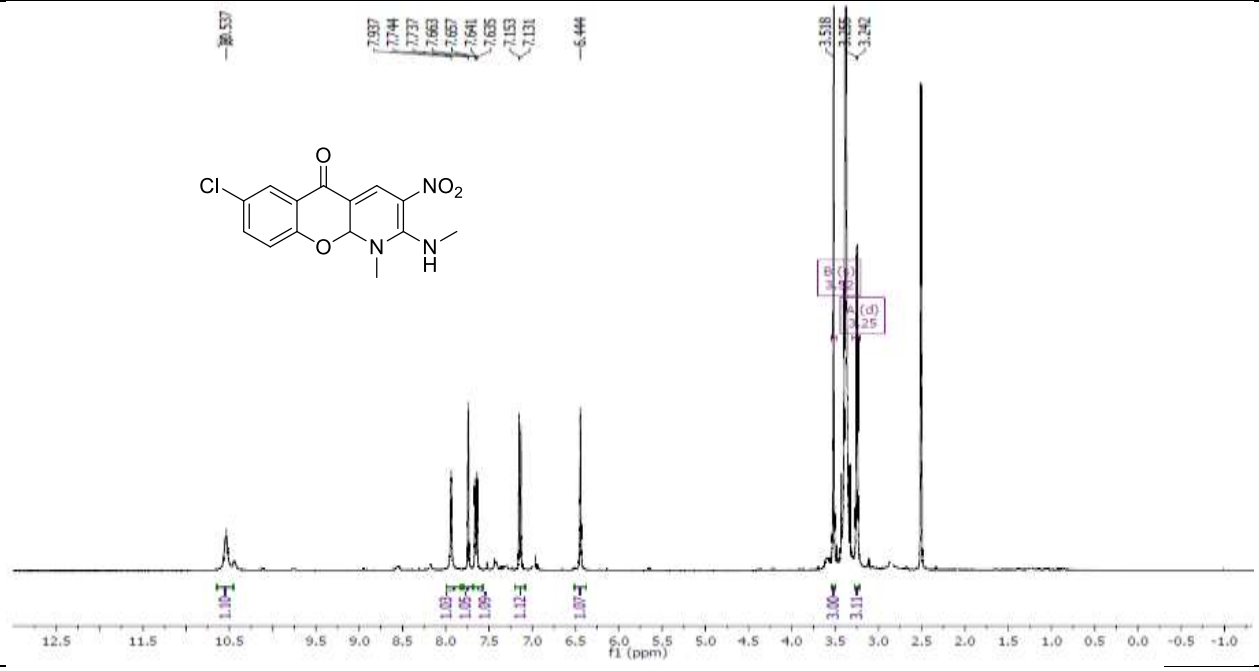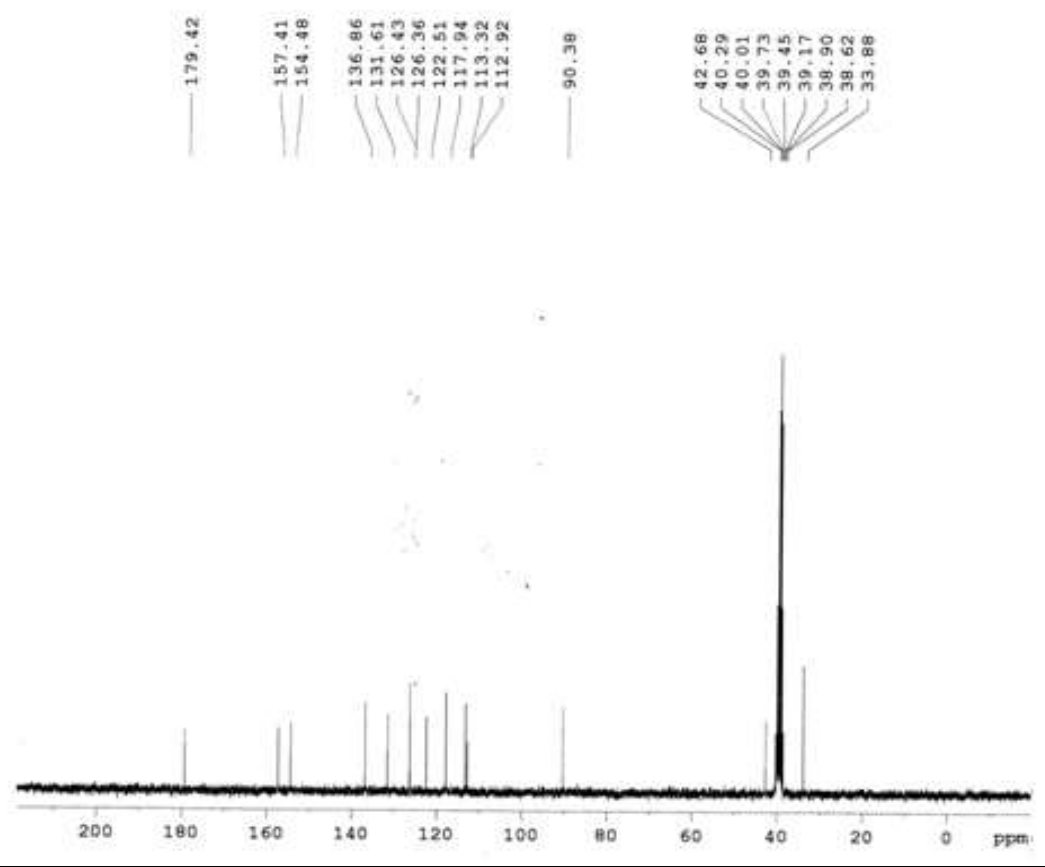

# <sup>1</sup>H NMR Spectra of Compound (5c)

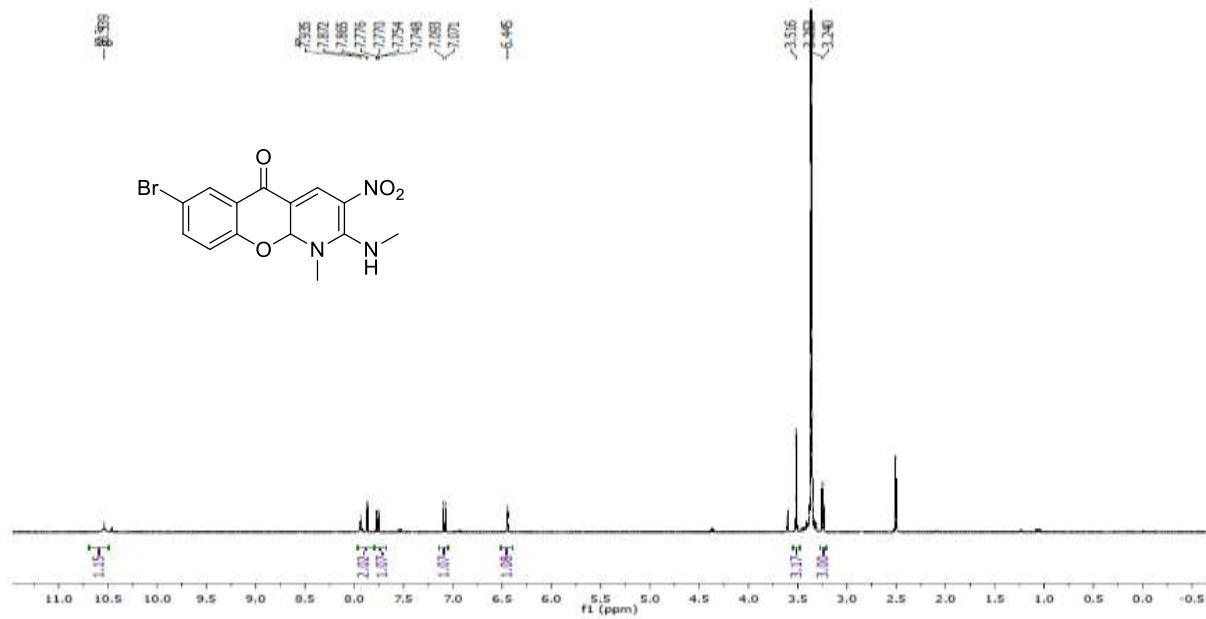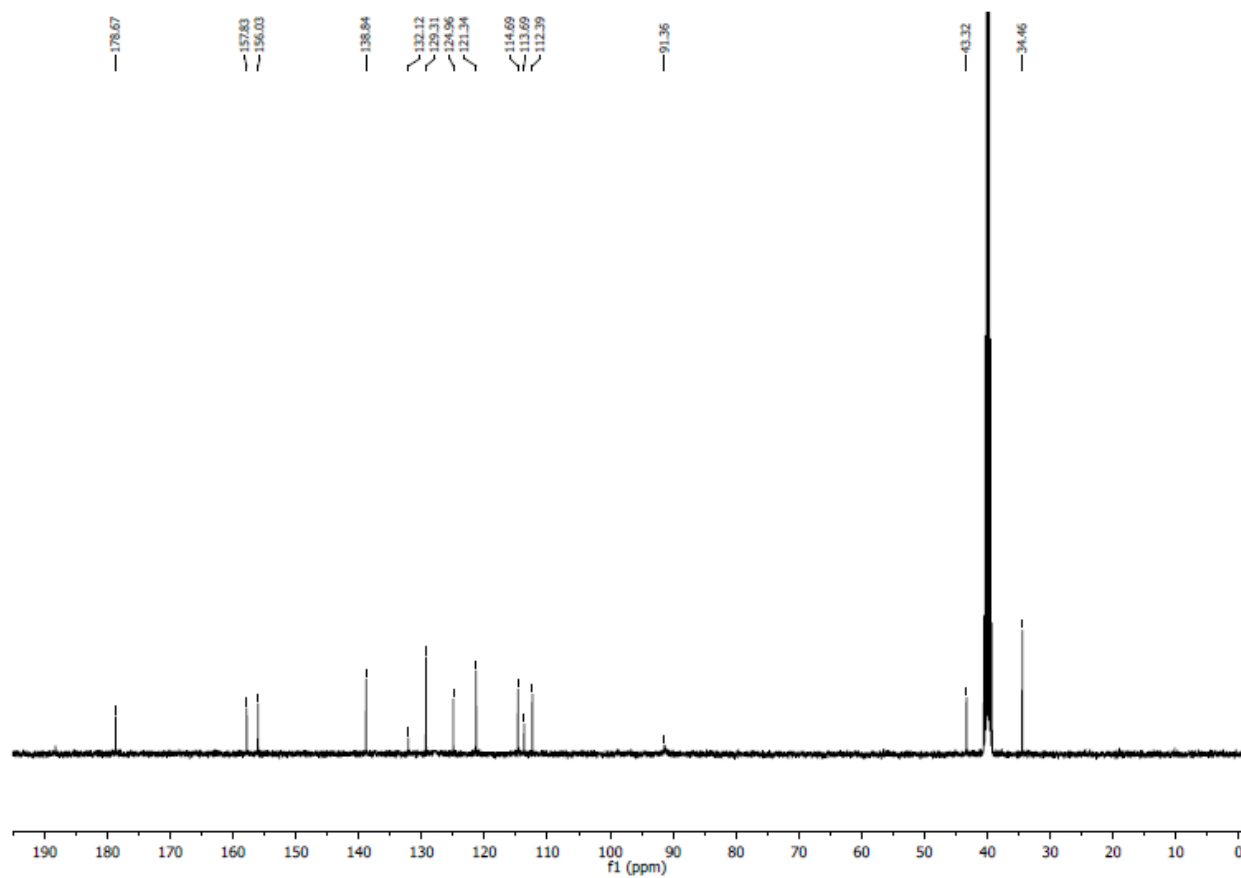

# <sup>1</sup>H and <sup>13</sup>C NMR Spectra of Compound (5d)

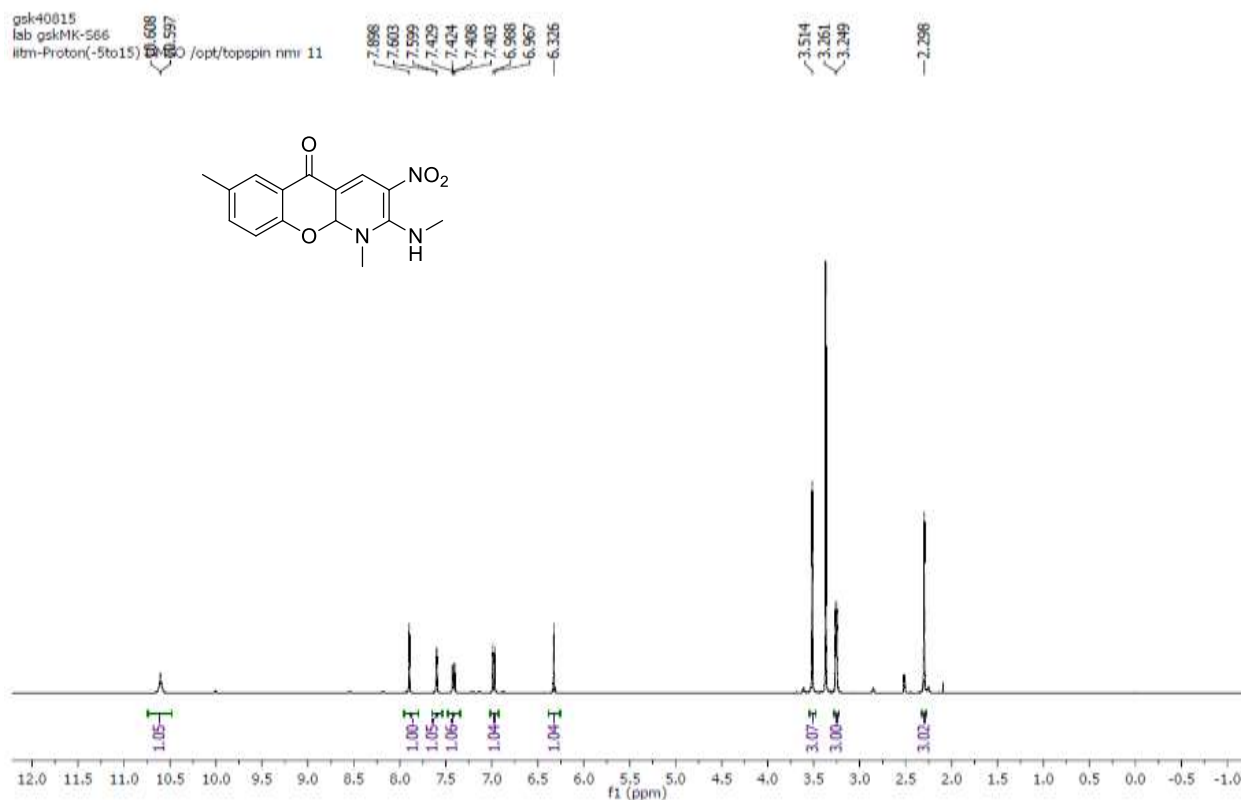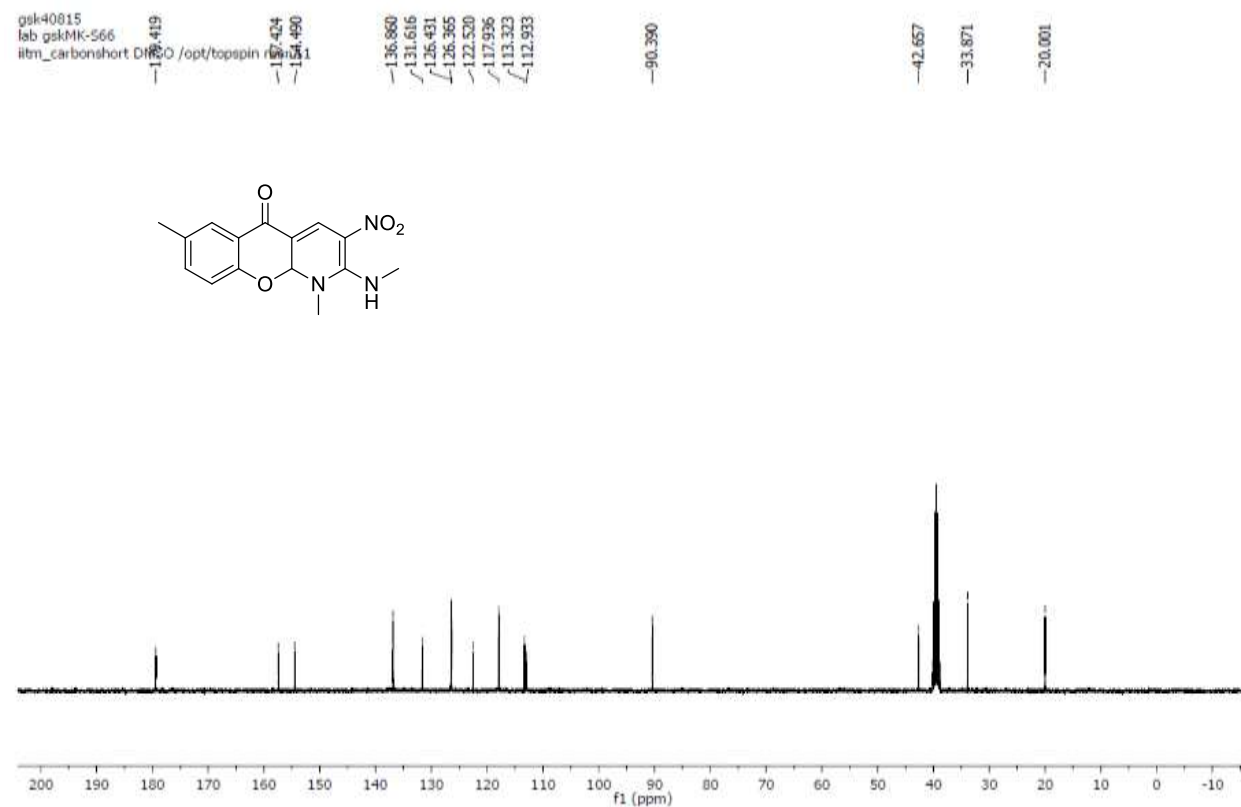

# <sup>1</sup>H and <sup>13</sup>C NMR Spectra of Compound (5e)

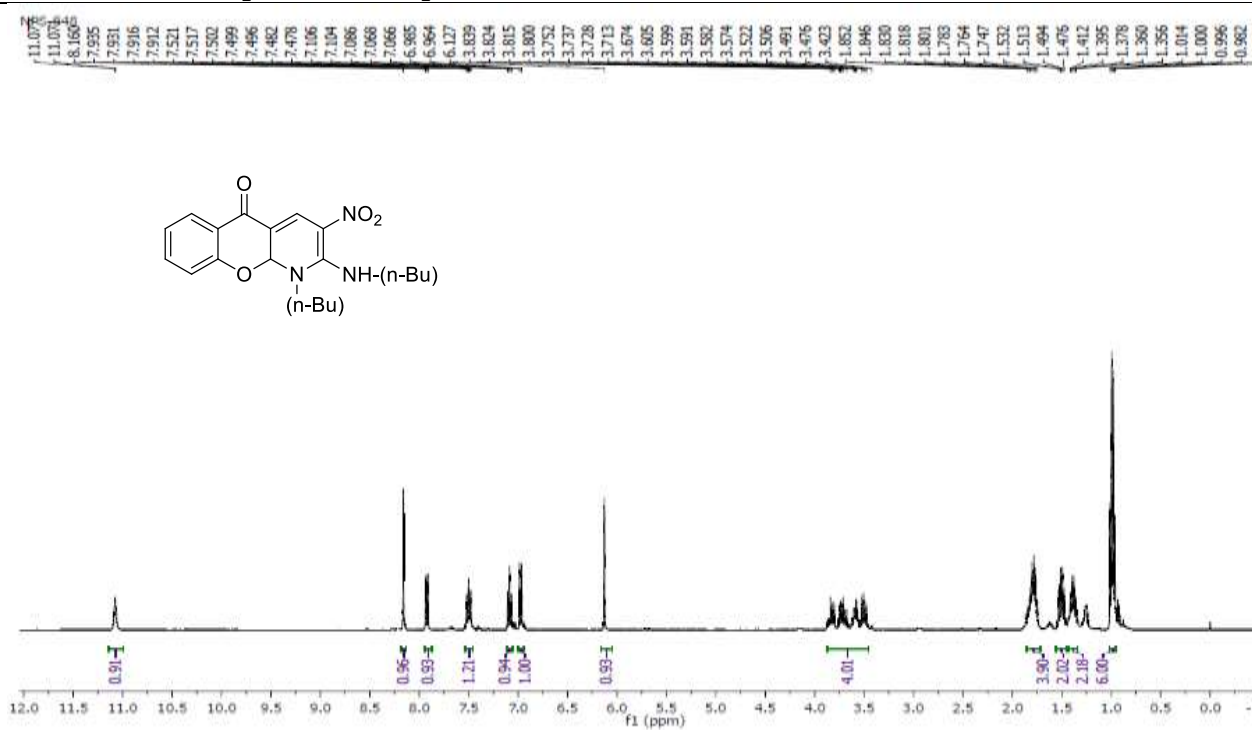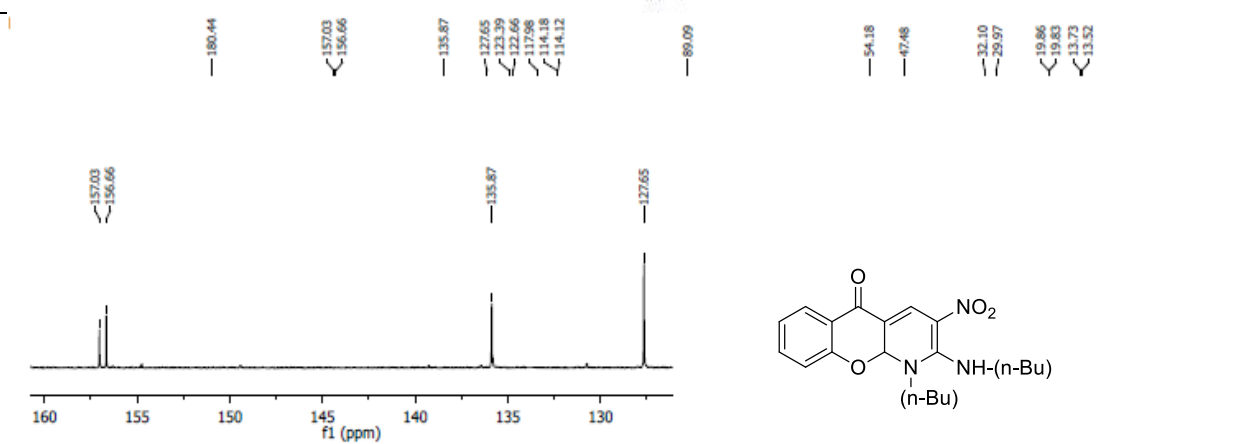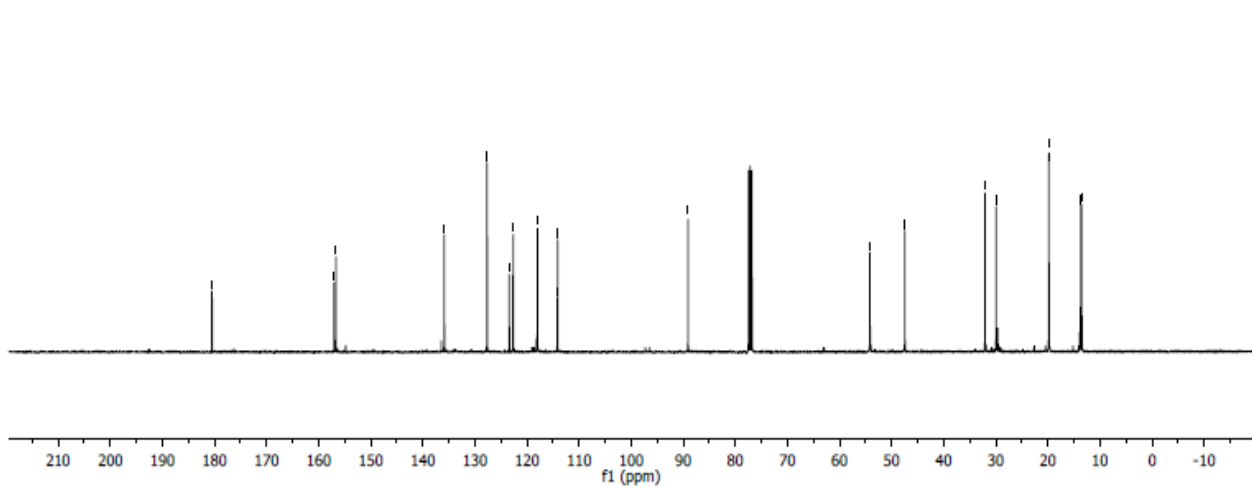

# <sup>1</sup>H and <sup>13</sup>C NMR Spectra of Compound (5f)

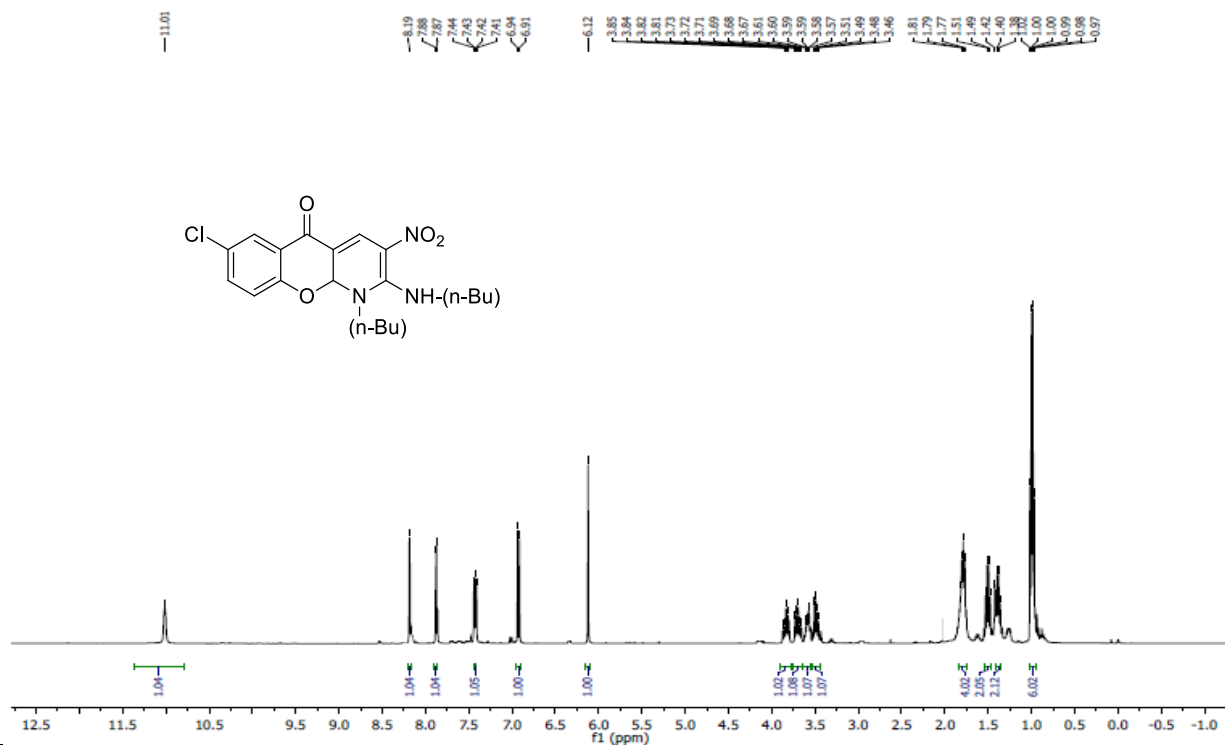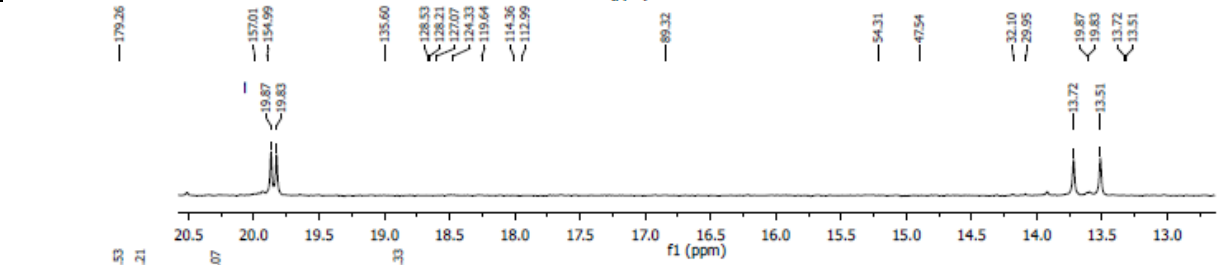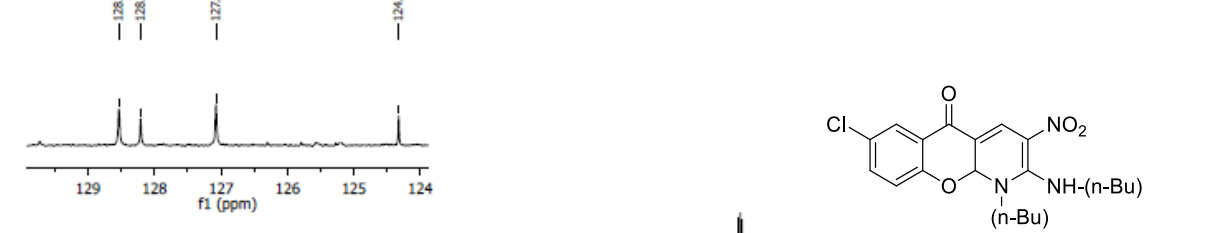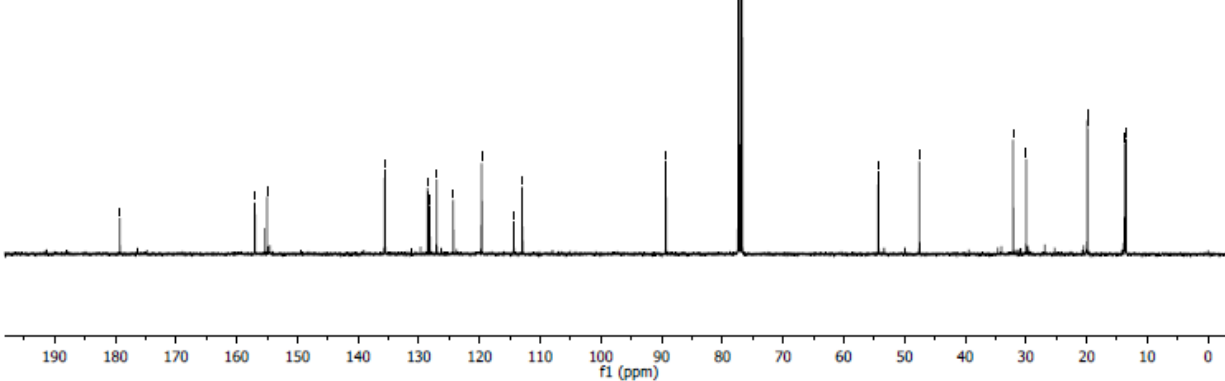

# <sup>1</sup>H and <sup>13</sup>C NMR Spectra of Compound (5g)

NPS-553

-11.036

-8.247

-7.818

-7.812

-7.552

-7.273

-6.187

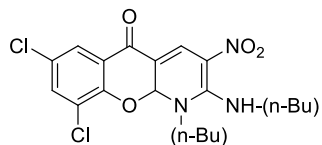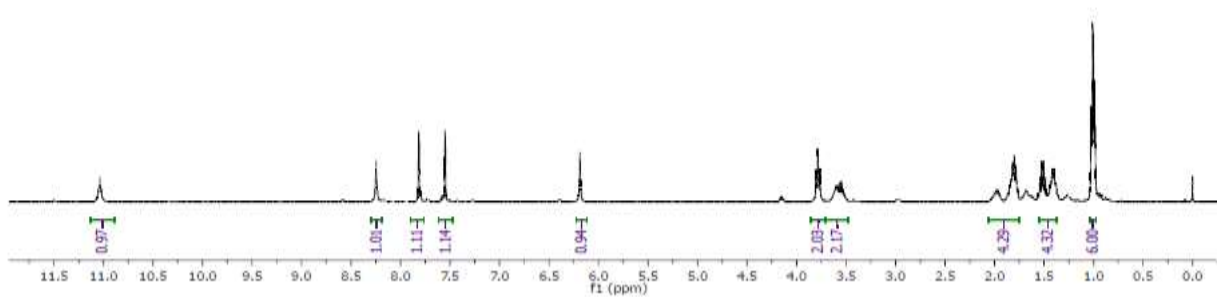

178.41

156.95

155.36

135.17

129.41

127.94

125.82

125.24

124.17

114.39

111.77

90.44

54.63

47.61

32.14

30.40

19.95

19.87

13.71

13.51

129.41

127.94

125.82

125.24

124.17

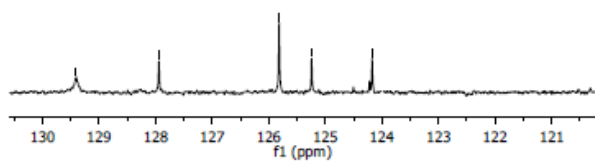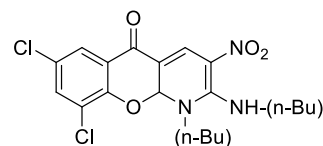

190 180 170 160 150 140 130 120 110 100 90 80 70 60 50 40 30 20 10 0

# <sup>1</sup>H and <sup>13</sup>C NMR Spectra of Compound (5h)

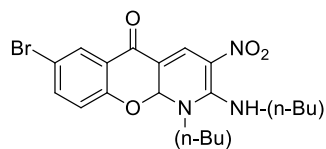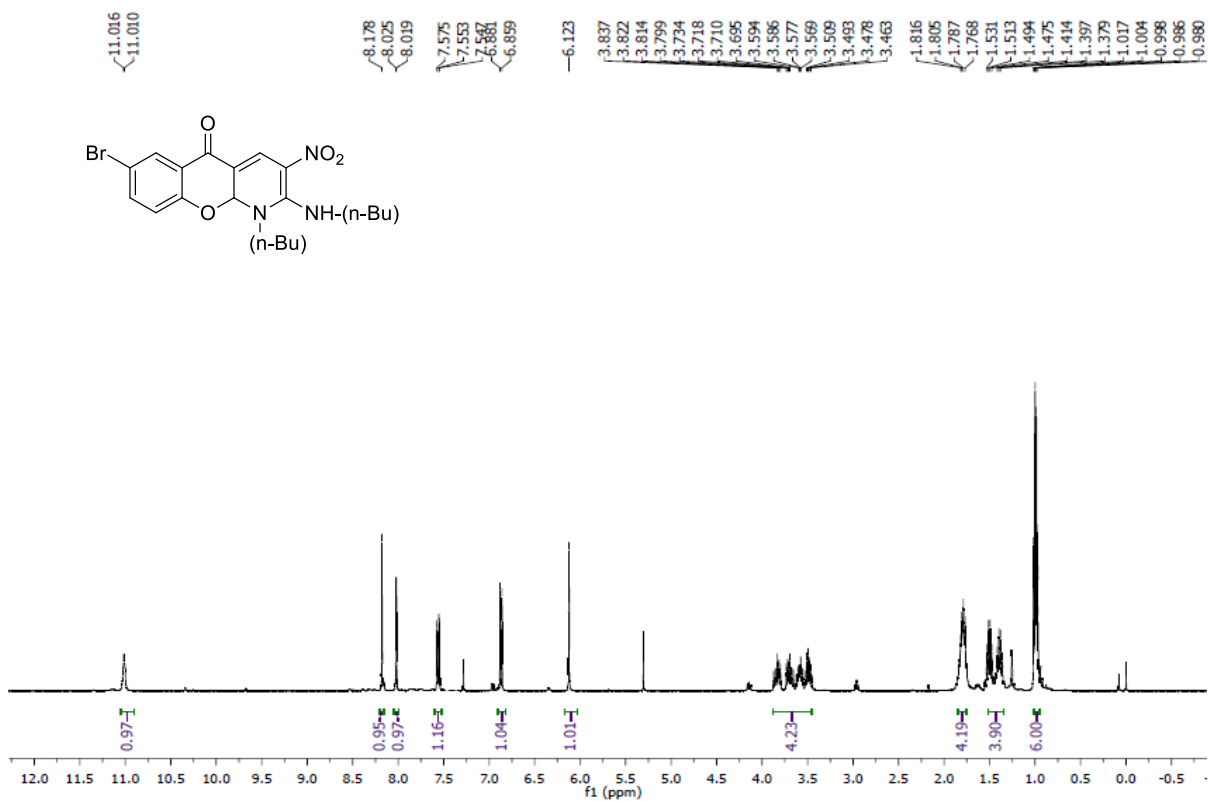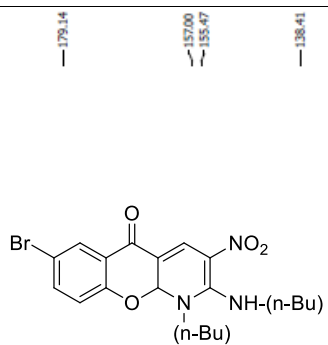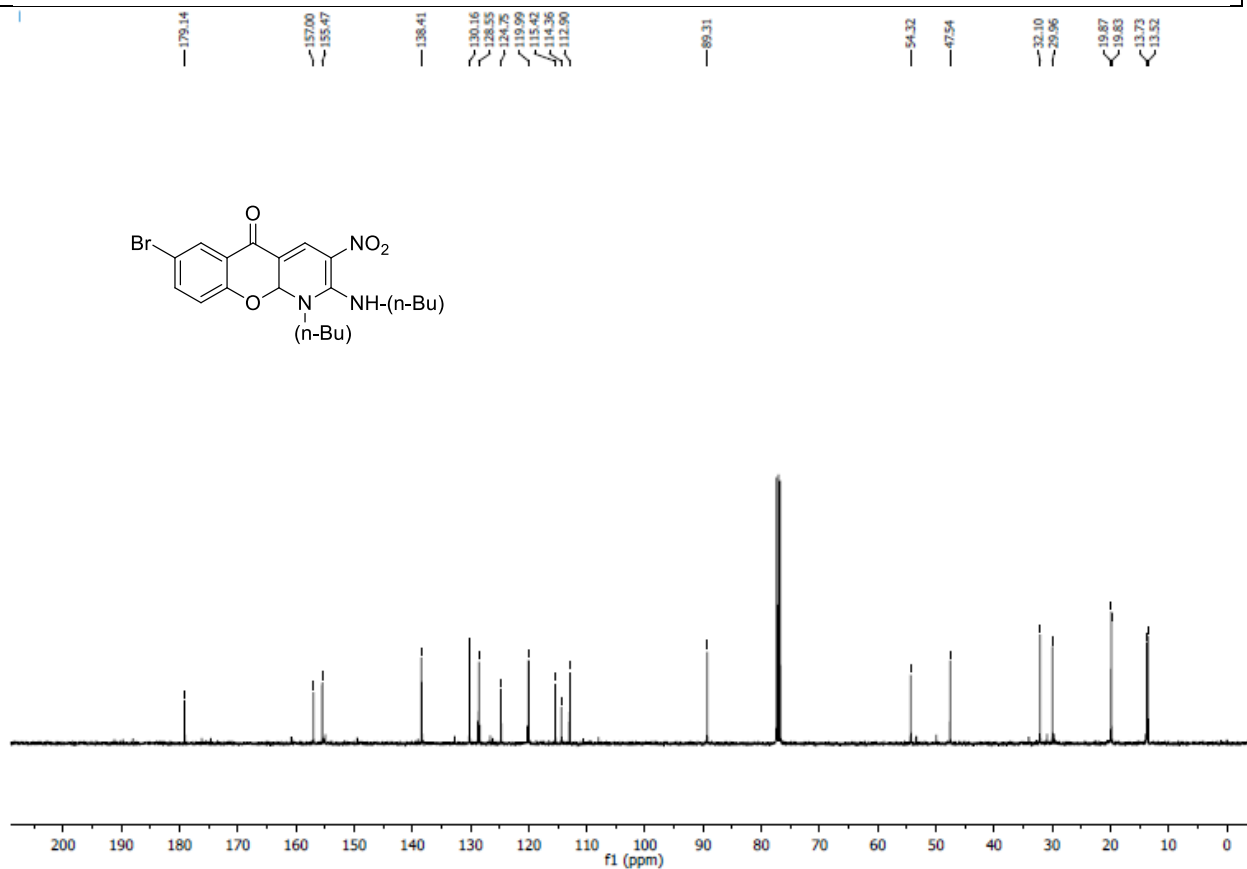

# <sup>1</sup>H and <sup>13</sup>C NMR Spectra of Compound (5i)

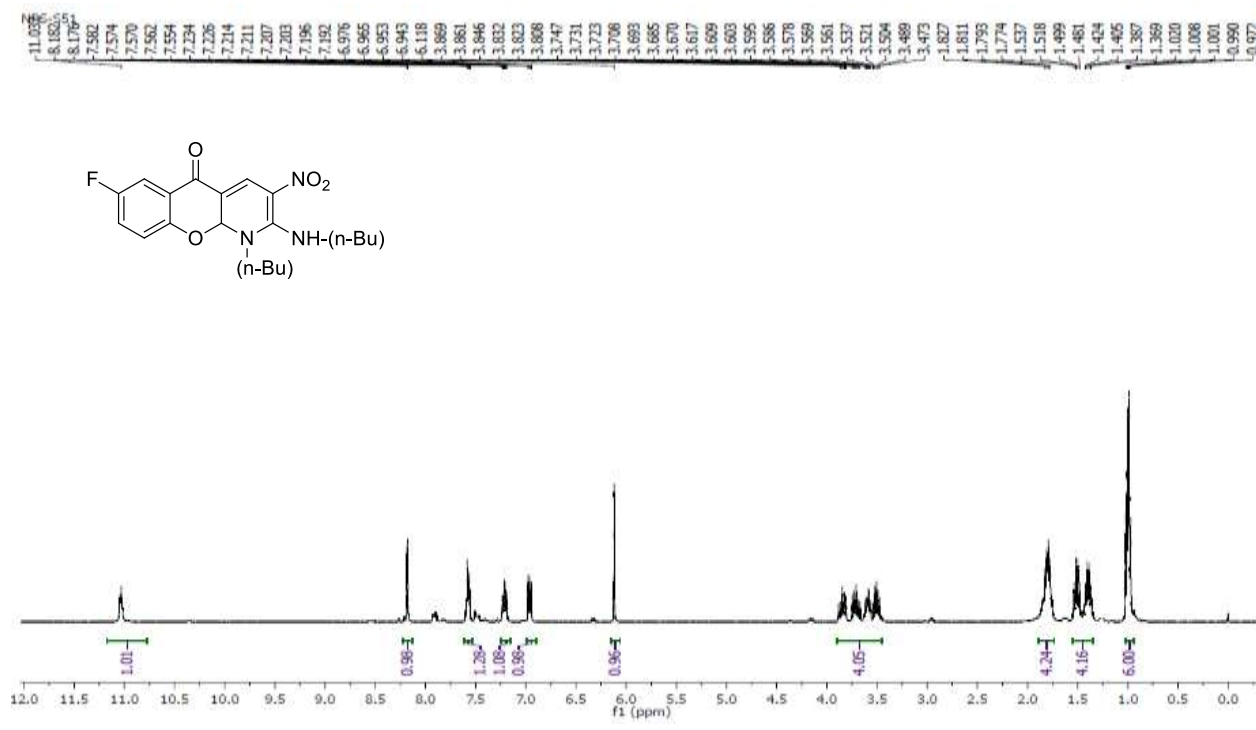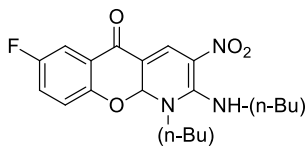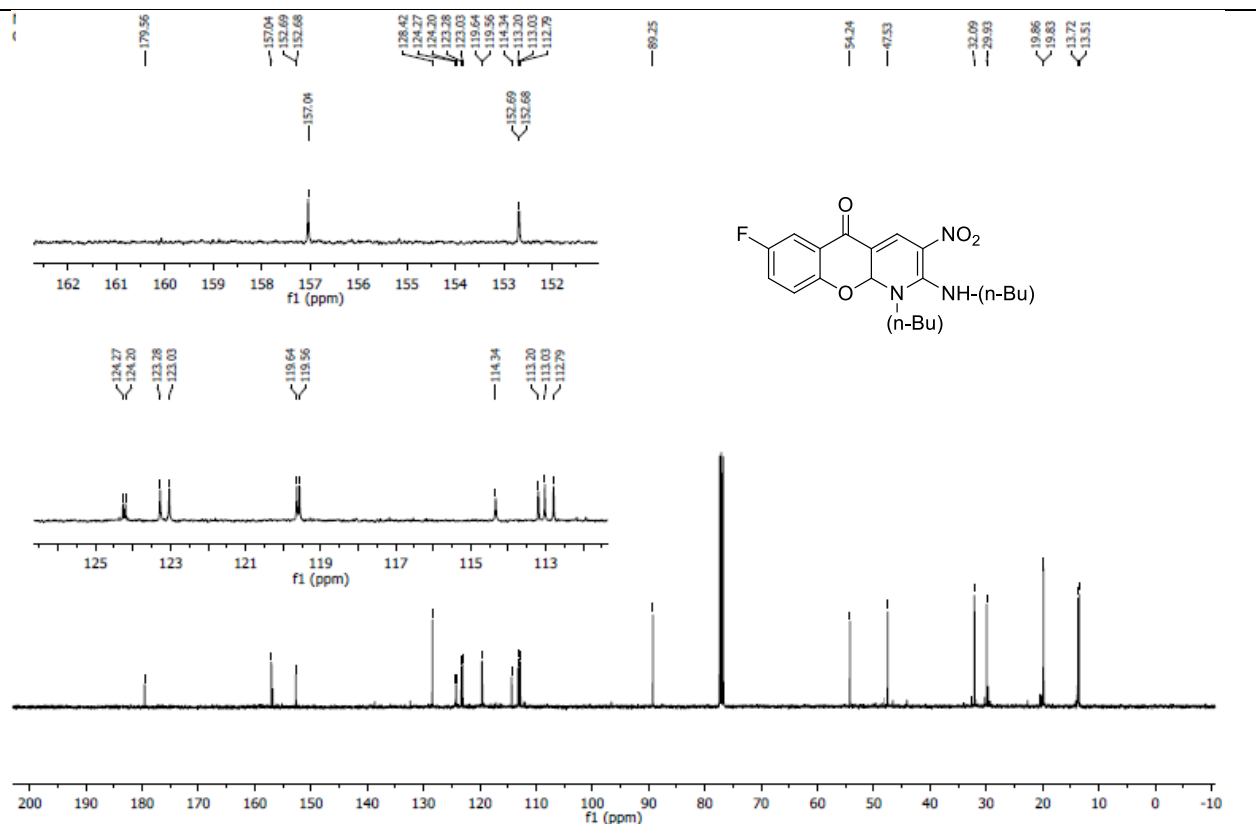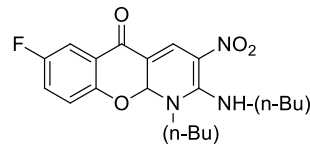



# <sup>1</sup>H and <sup>13</sup>C NMR Spectra of Compound (5j)

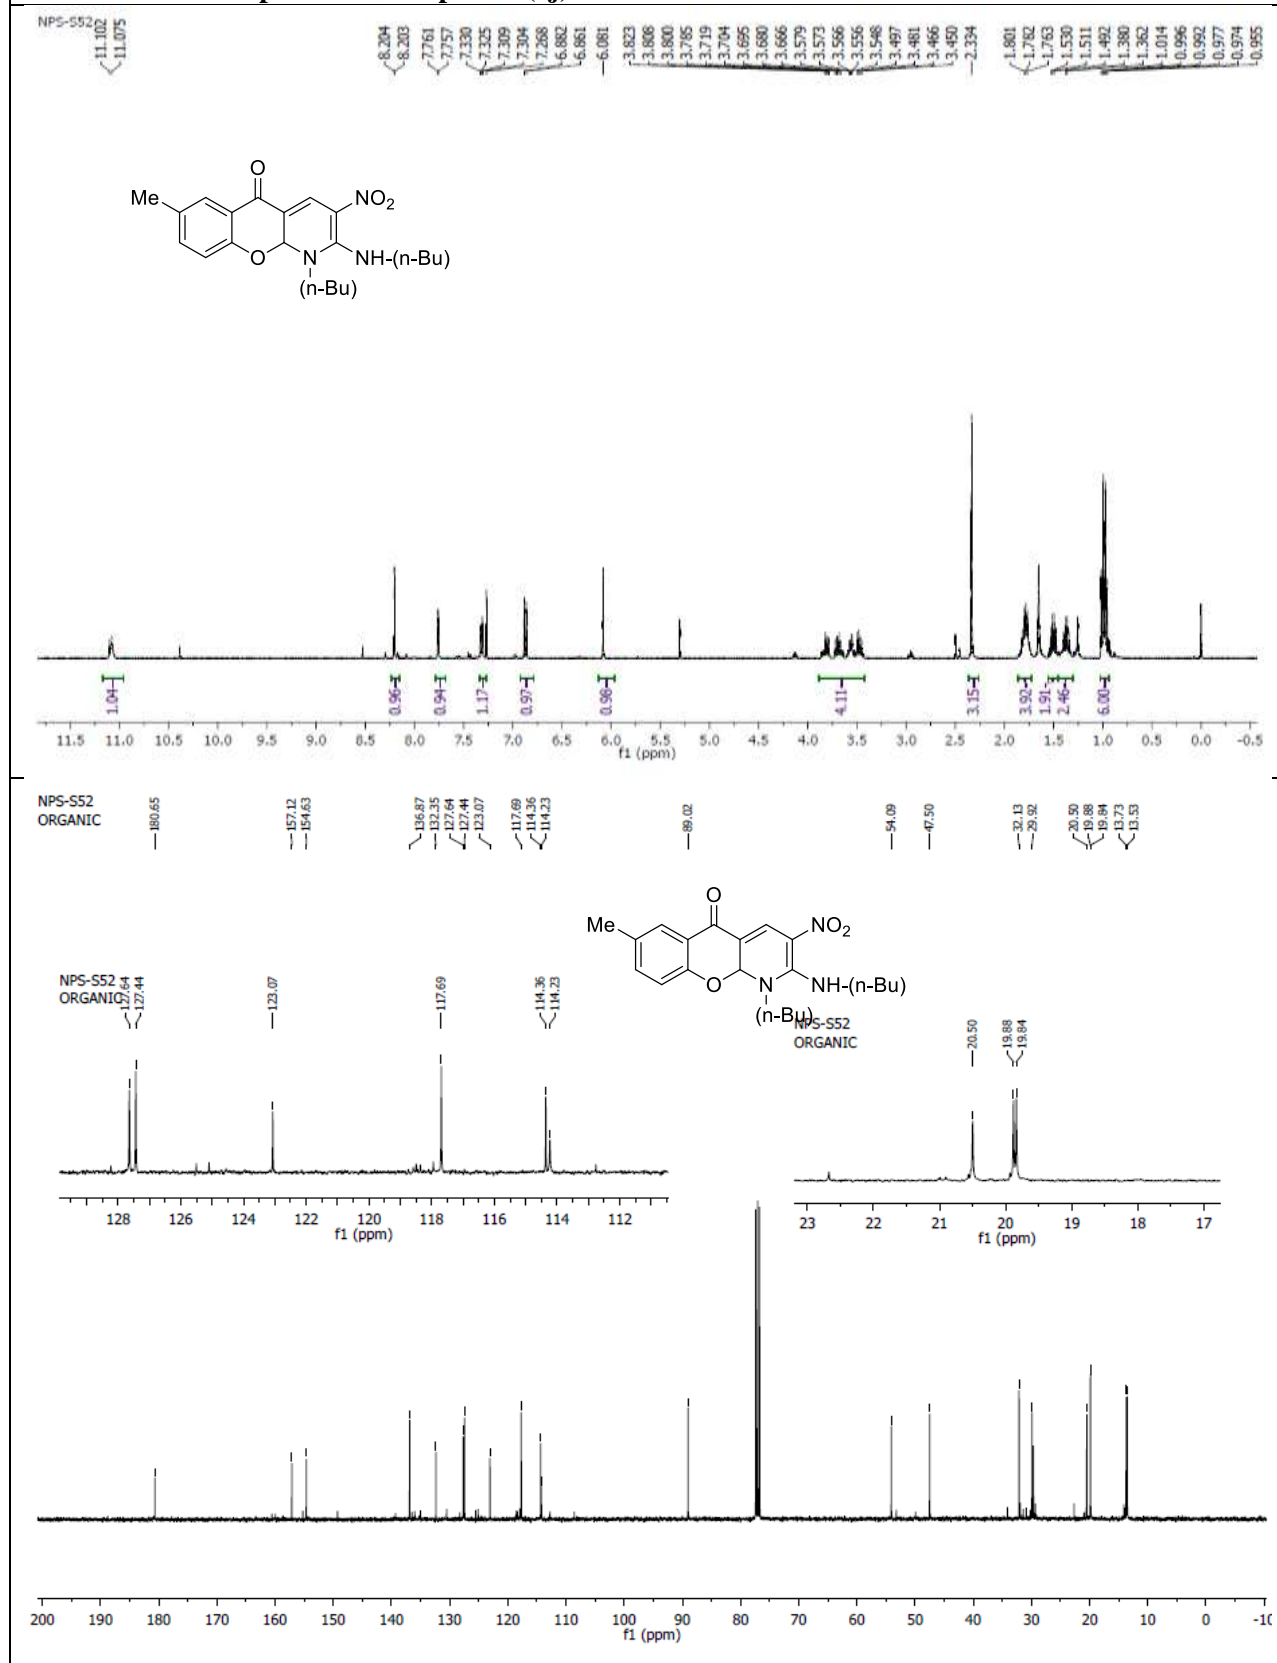

# <sup>1</sup>H and <sup>13</sup>C NMR Spectra of Compound (5k)

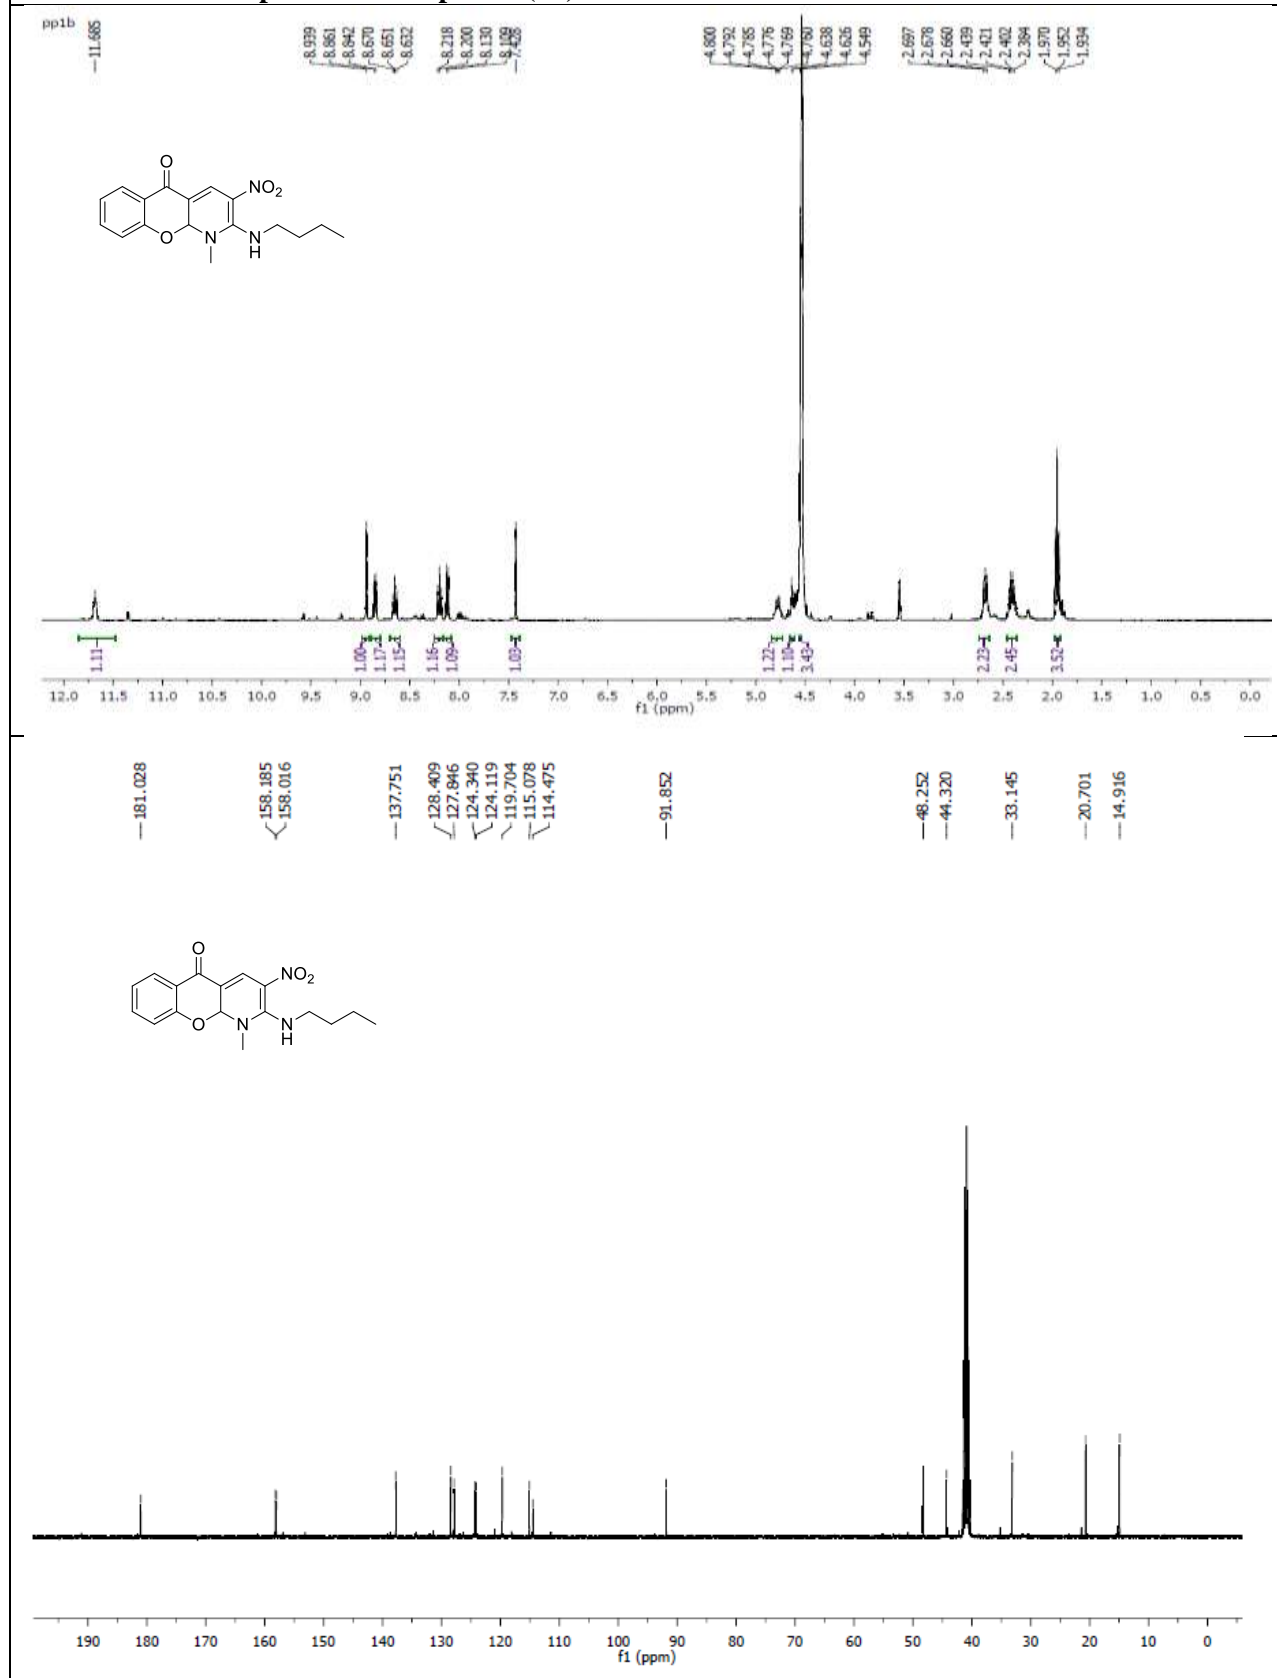

# <sup>1</sup>H and <sup>13</sup>C NMR Spectra of Compound (5l)

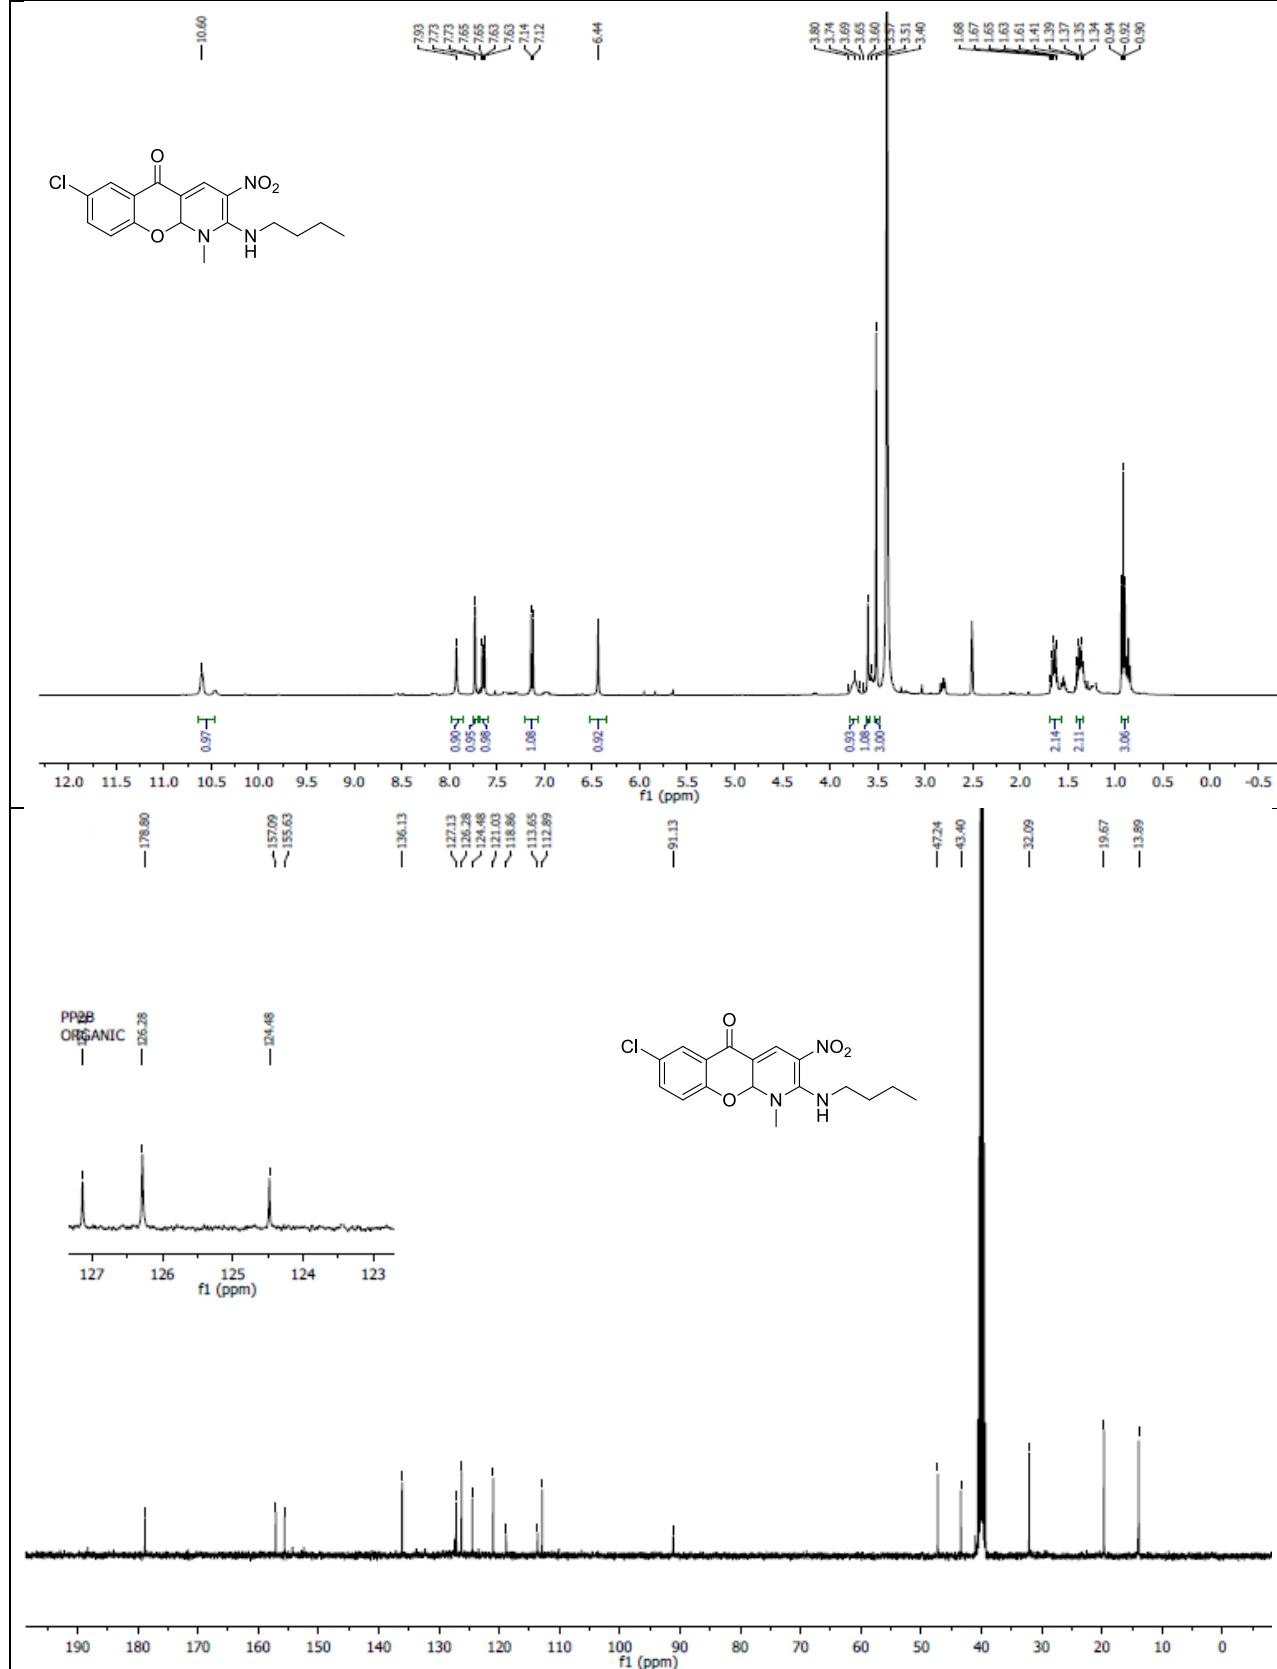

# <sup>1</sup>H and <sup>13</sup>C NMR Spectra of Compound (5m)

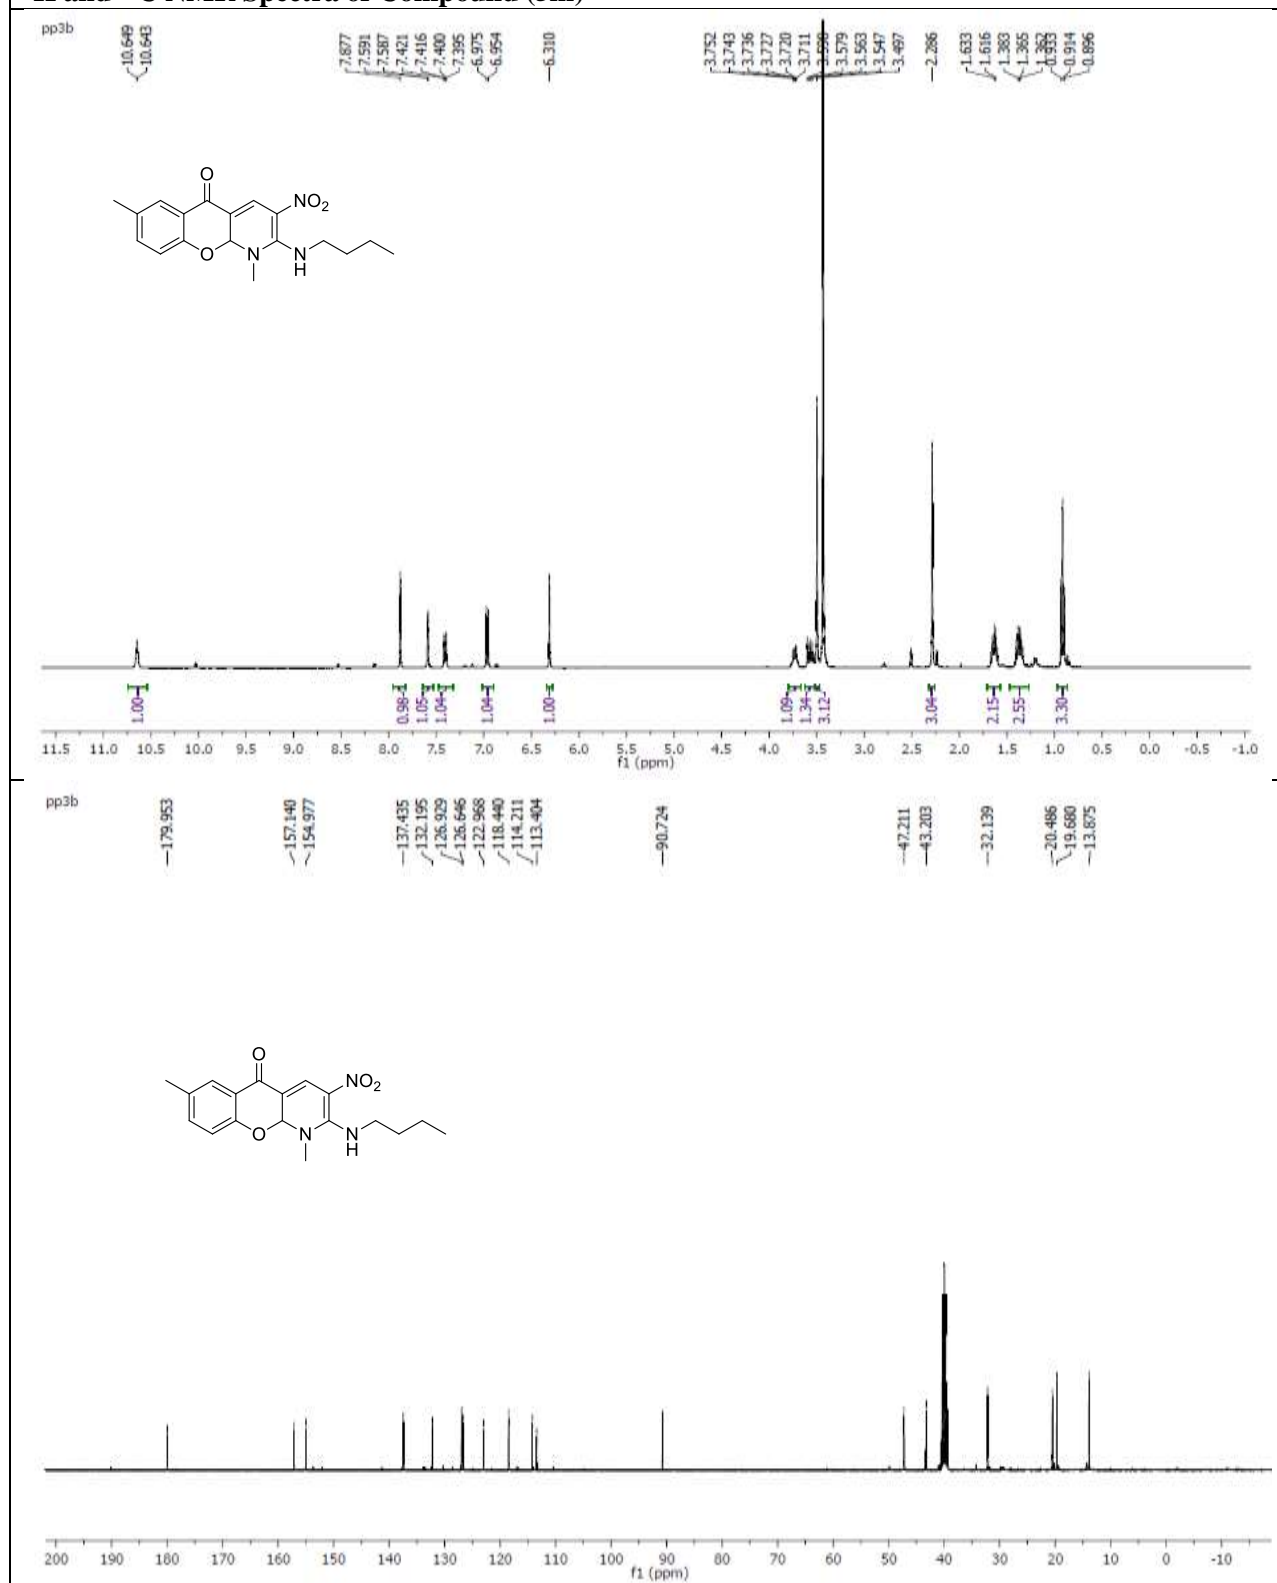

# <sup>1</sup>H and <sup>13</sup>C NMR Spectra of Compound (5n)

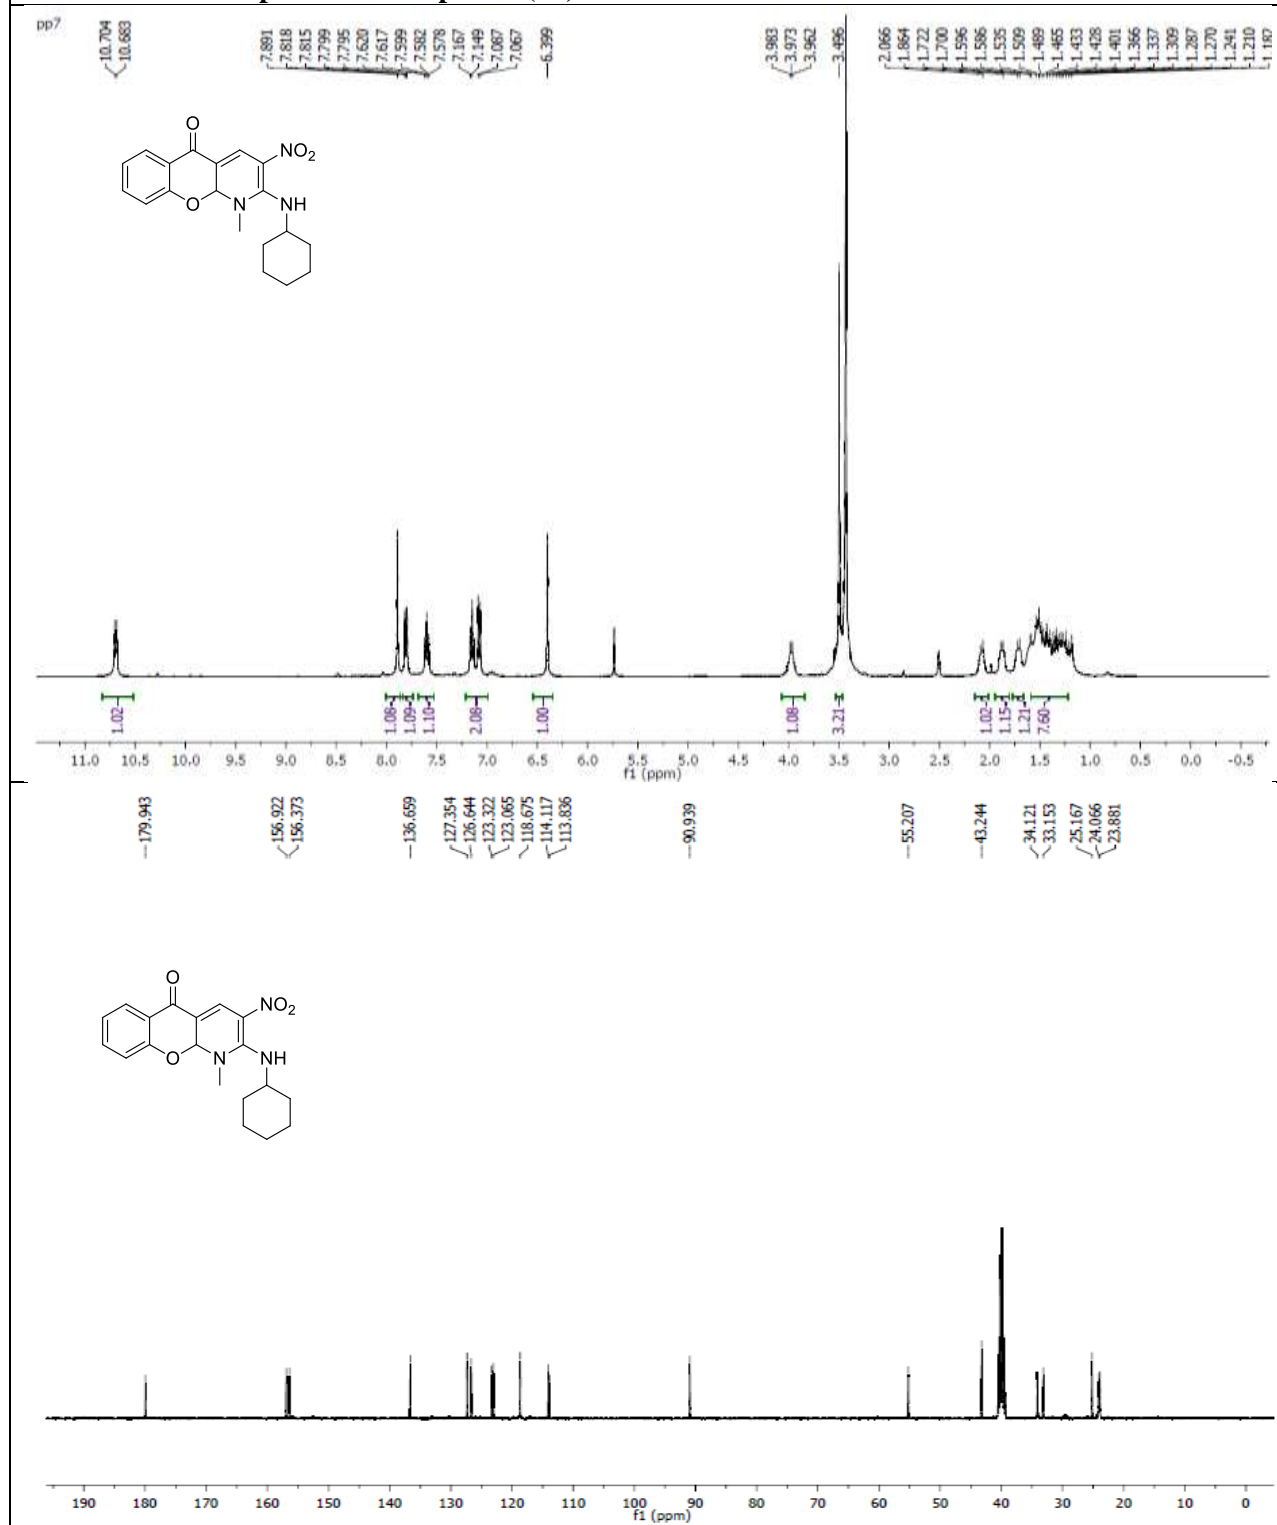

# <sup>1</sup>H and <sup>13</sup>C NMR Spectra of Compound (5o)

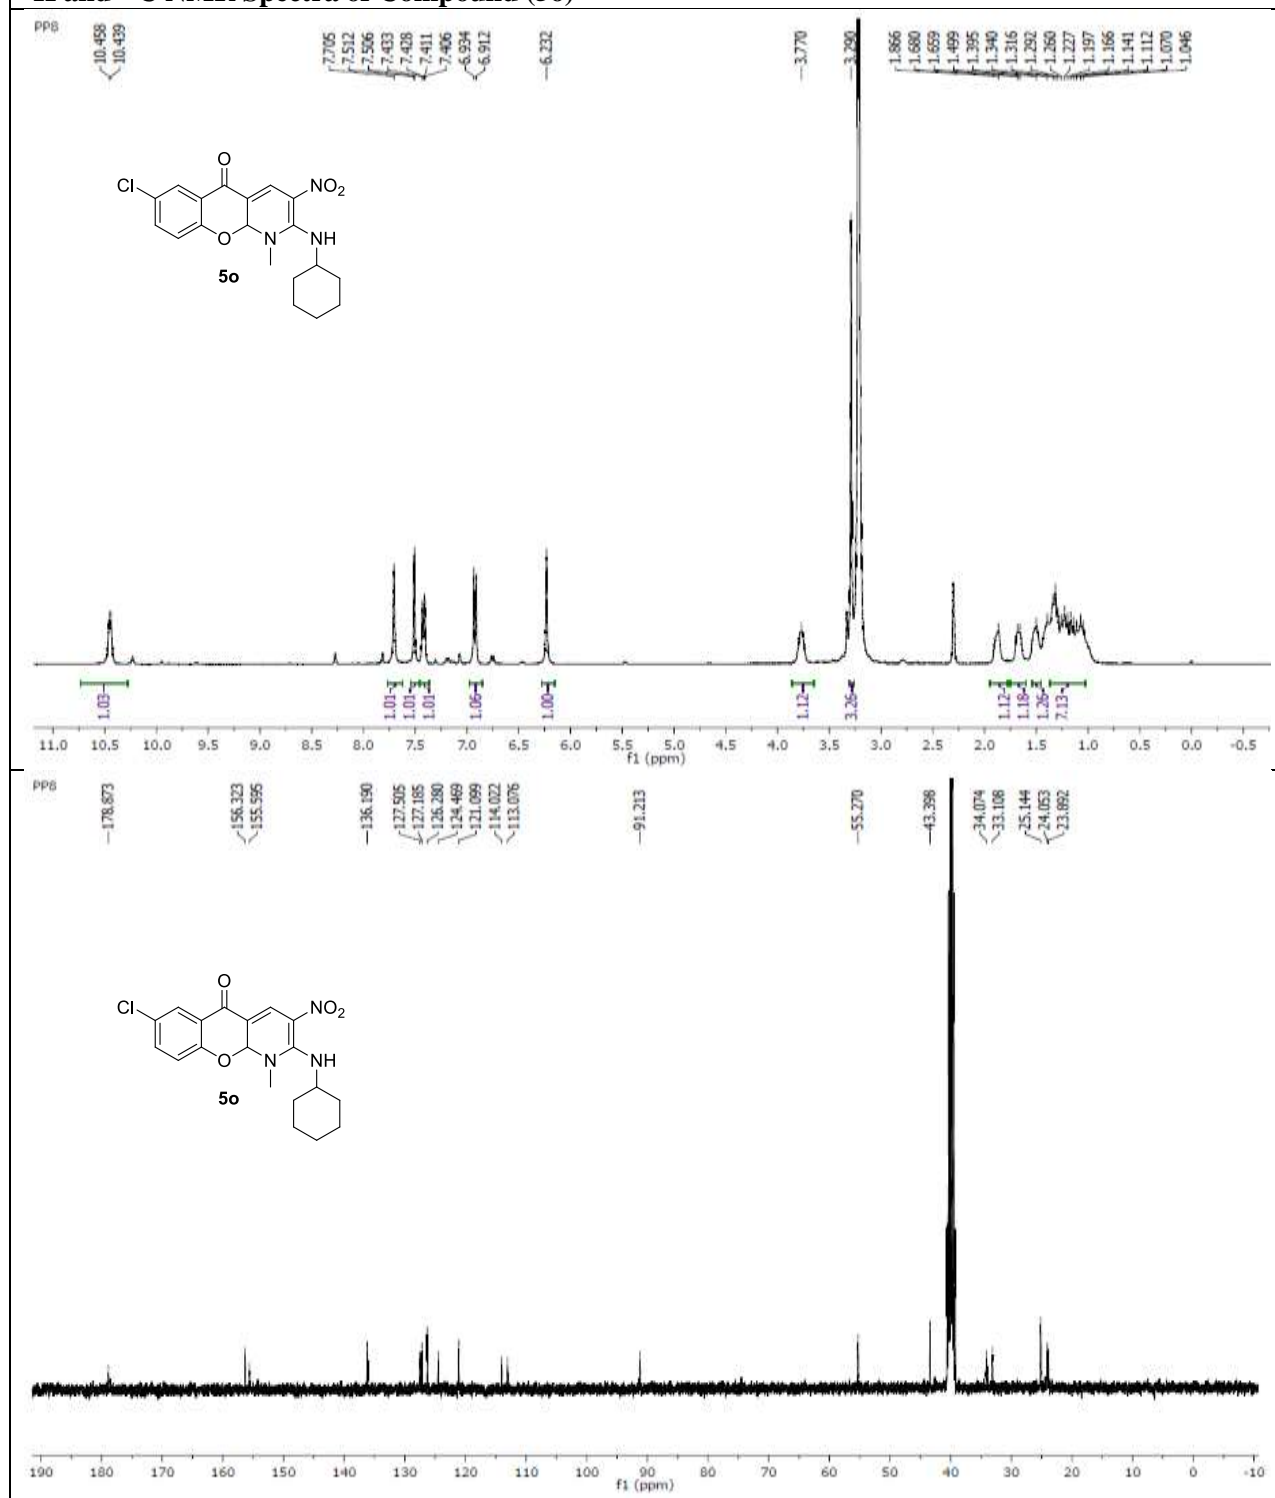

# <sup>1</sup>H and <sup>13</sup>C NMR Spectra of Compound (5p)

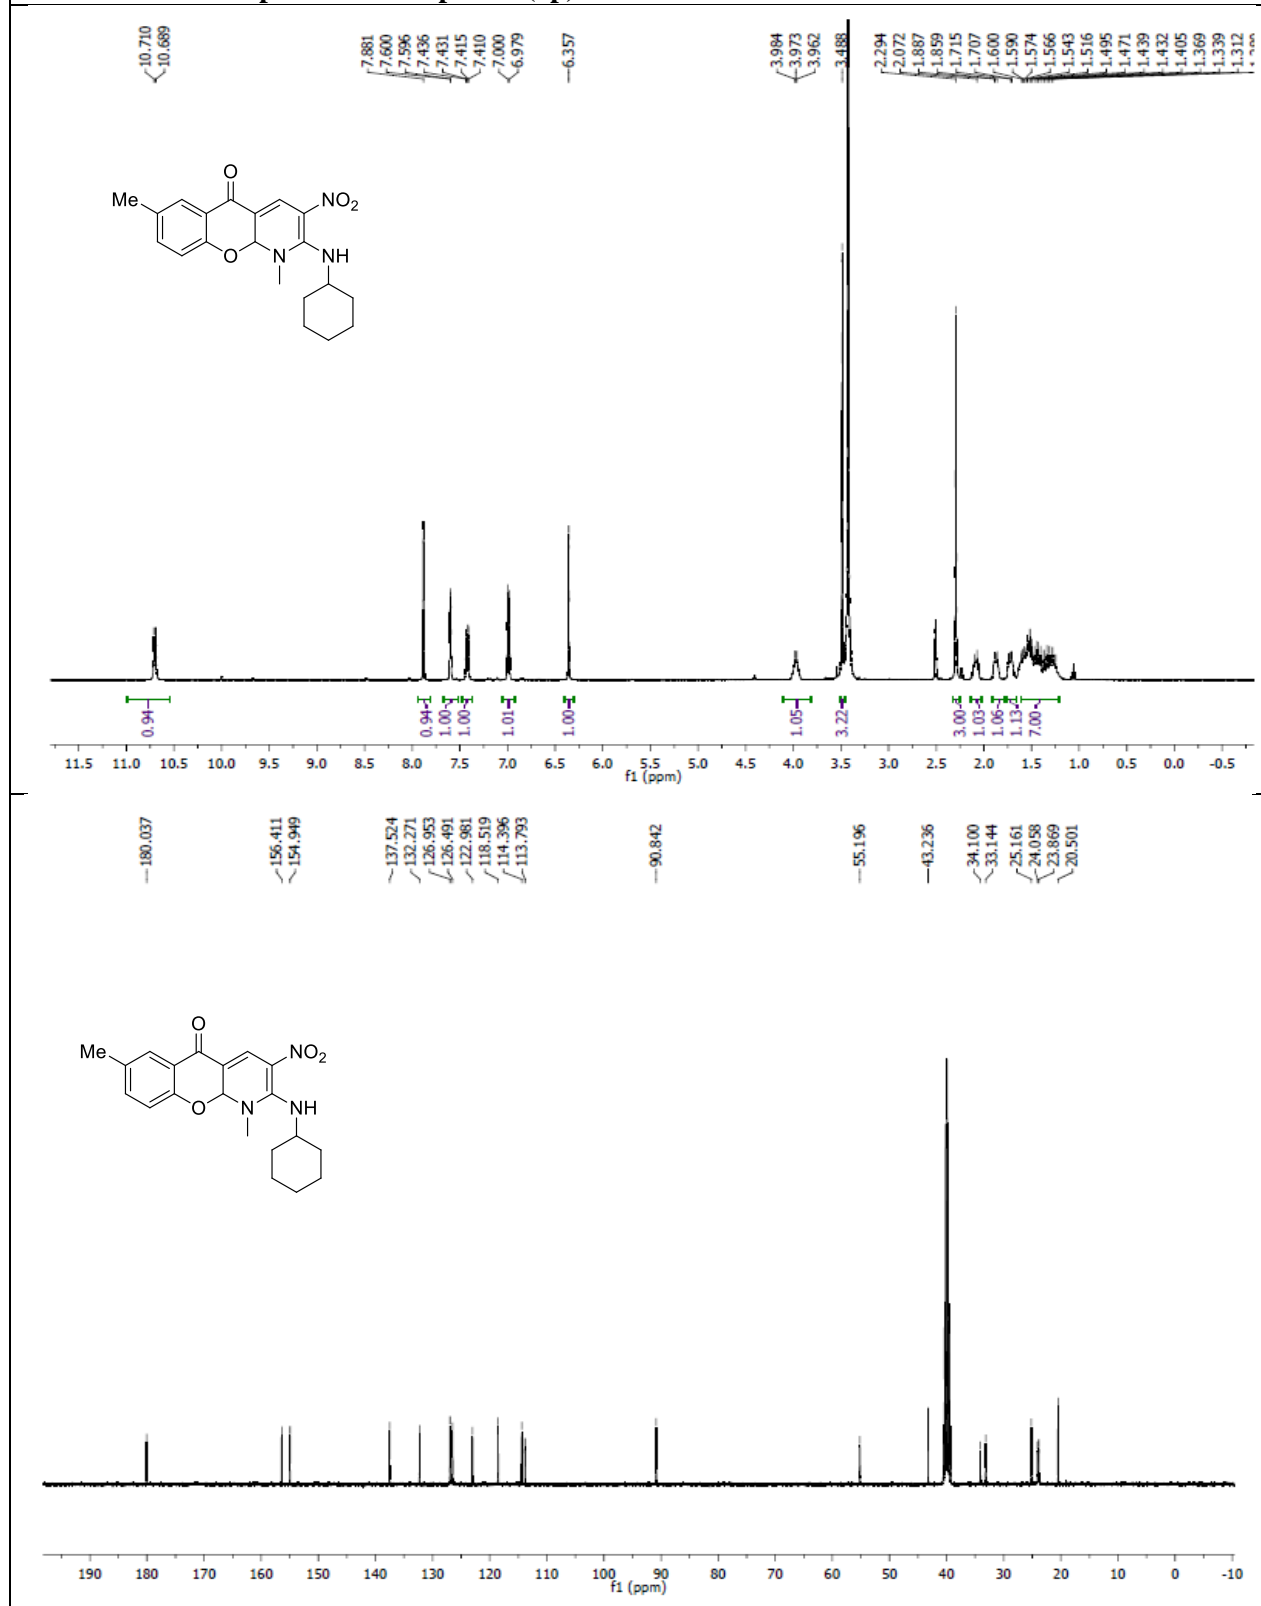

# <sup>1</sup>H and <sup>13</sup>C NMR Spectra of Compound (14)

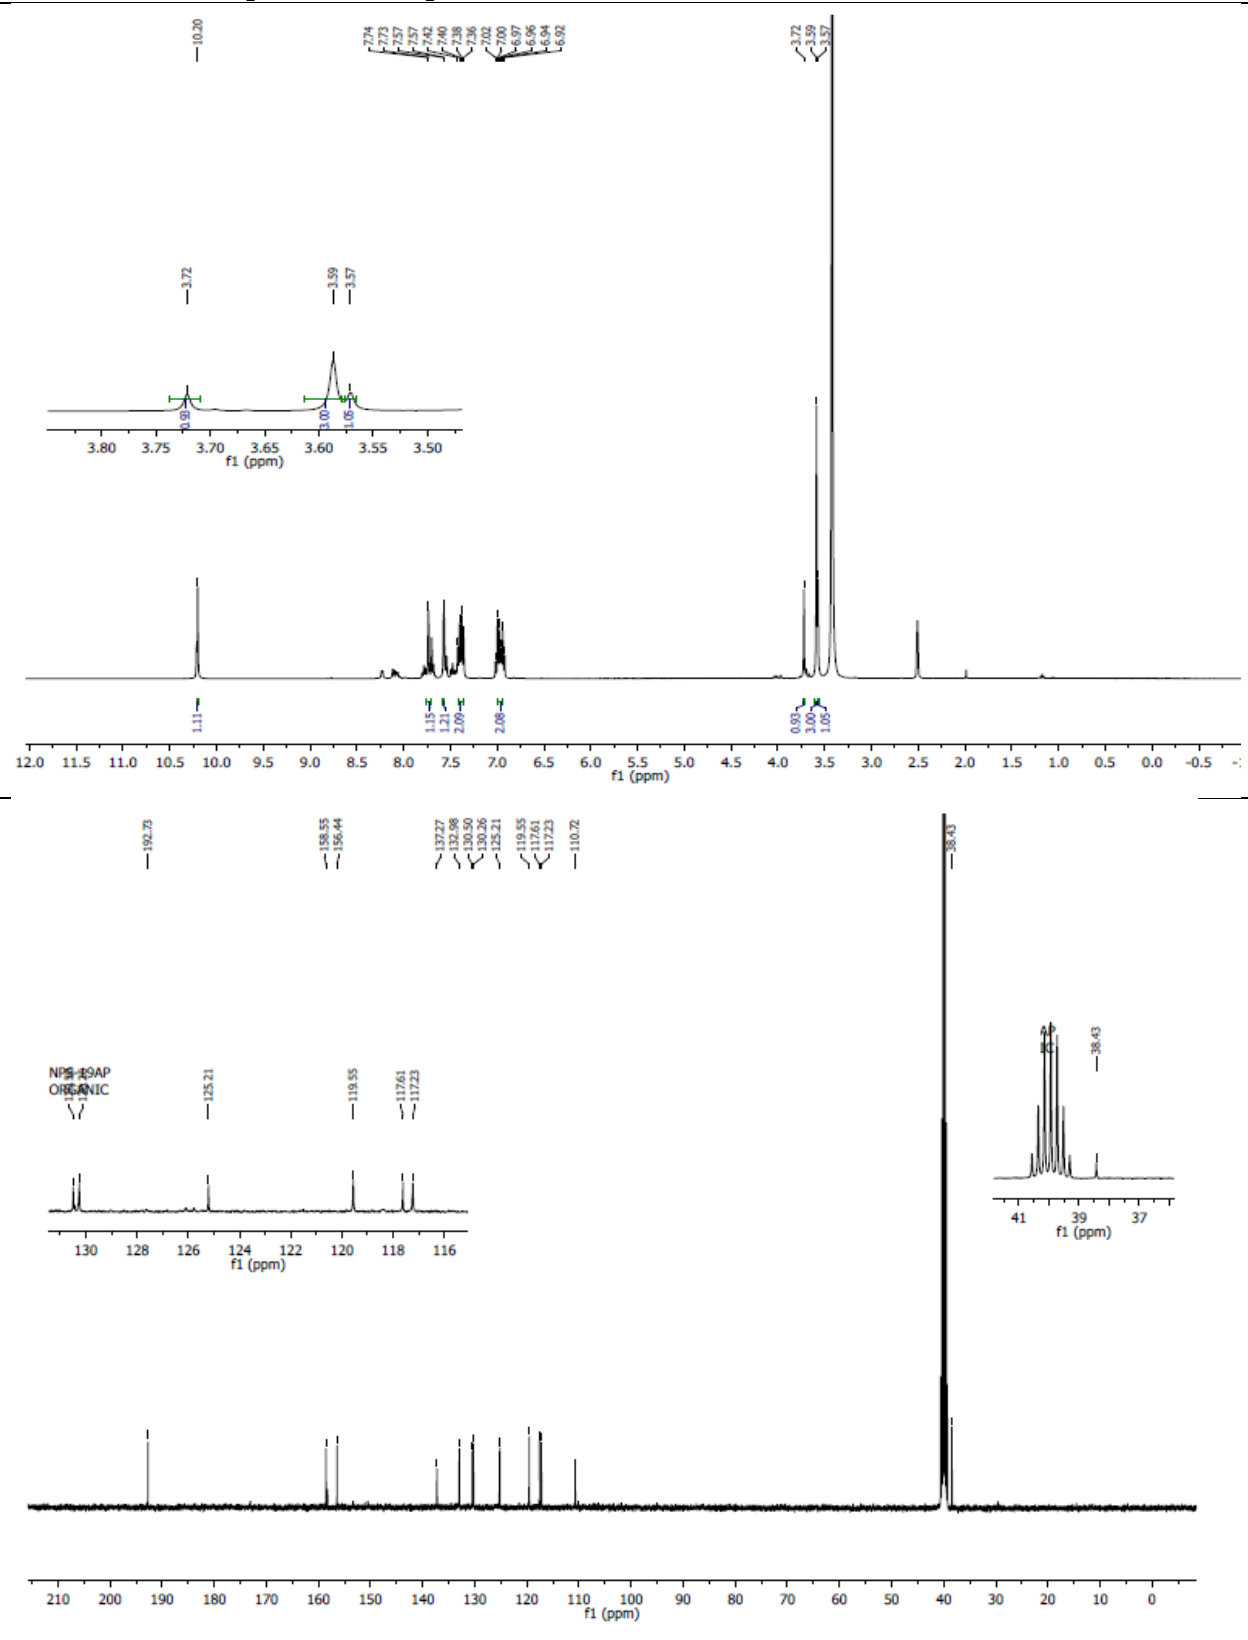



**EI-HRMS Spectrum:**

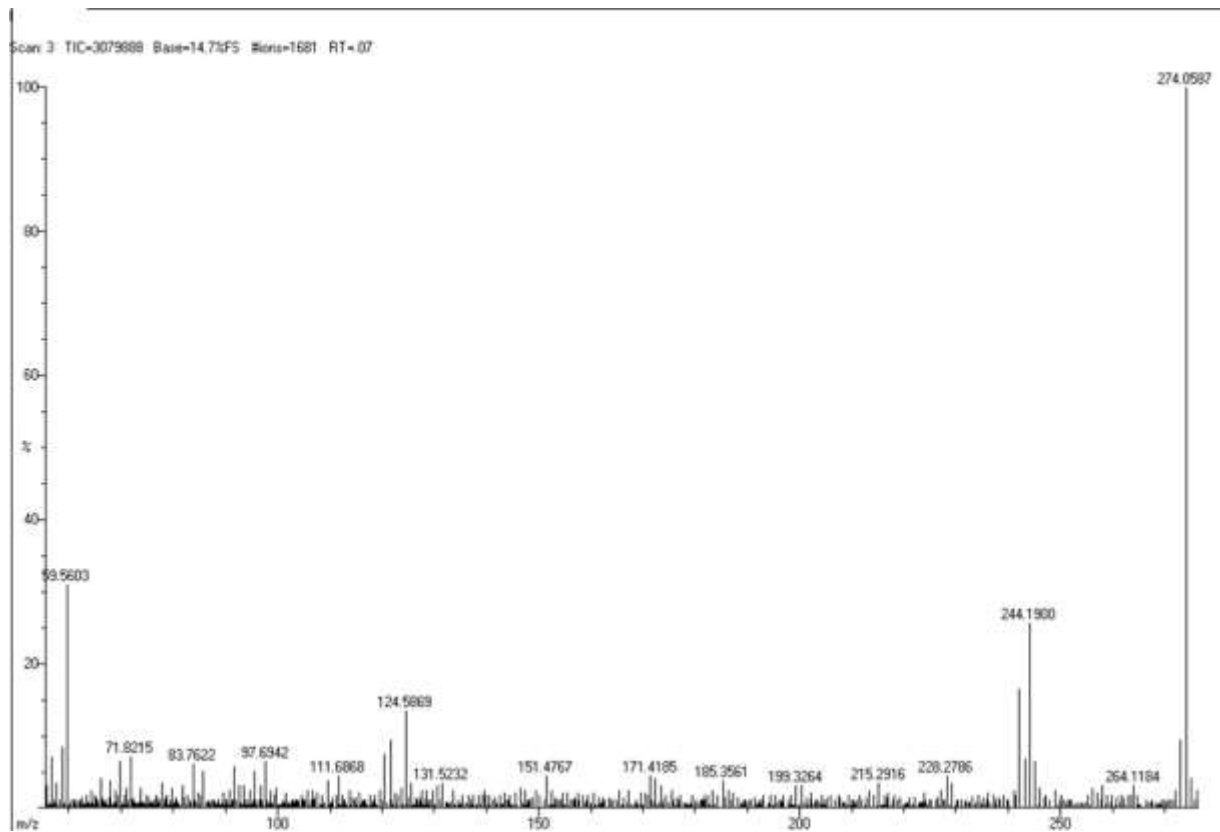

**EI-HRMS spectrum of compound 3a**

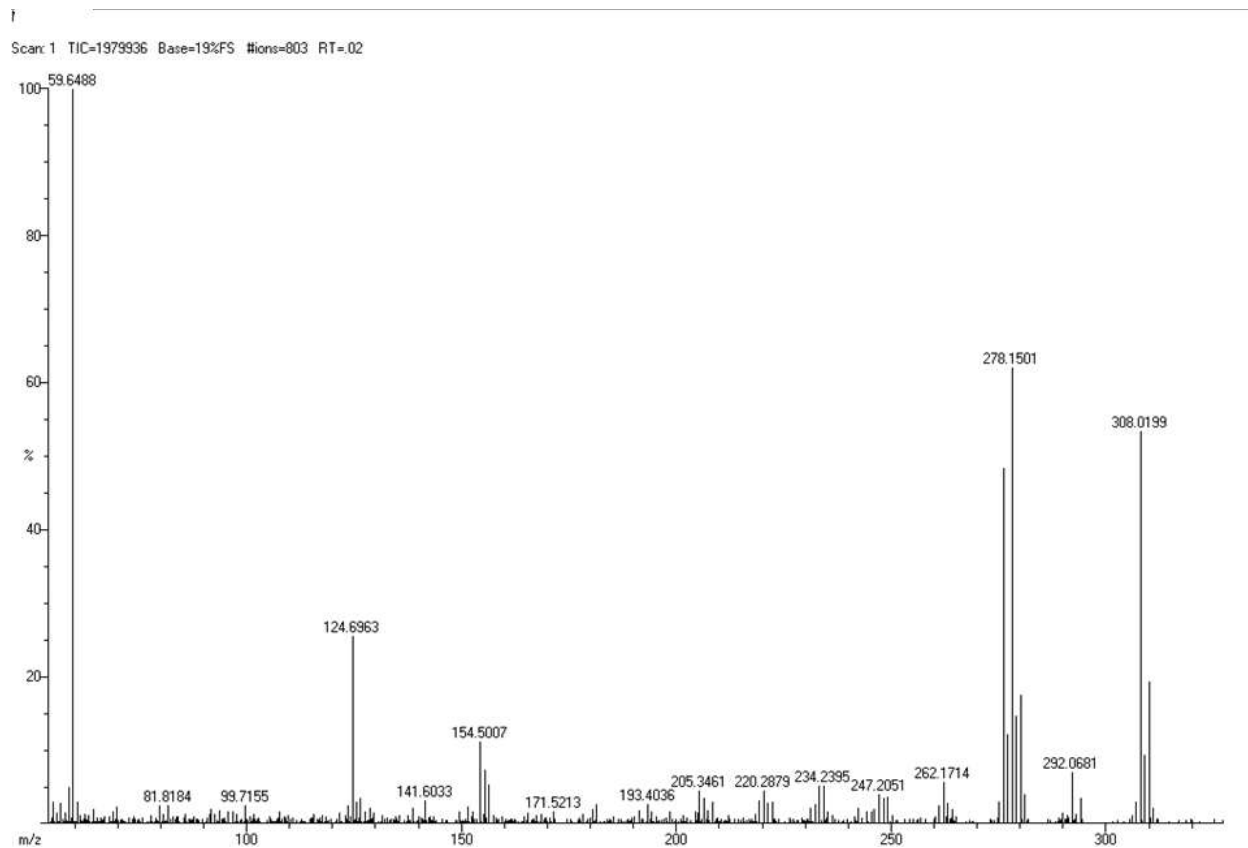

**EI-HRMS spectrum of compound 3b**

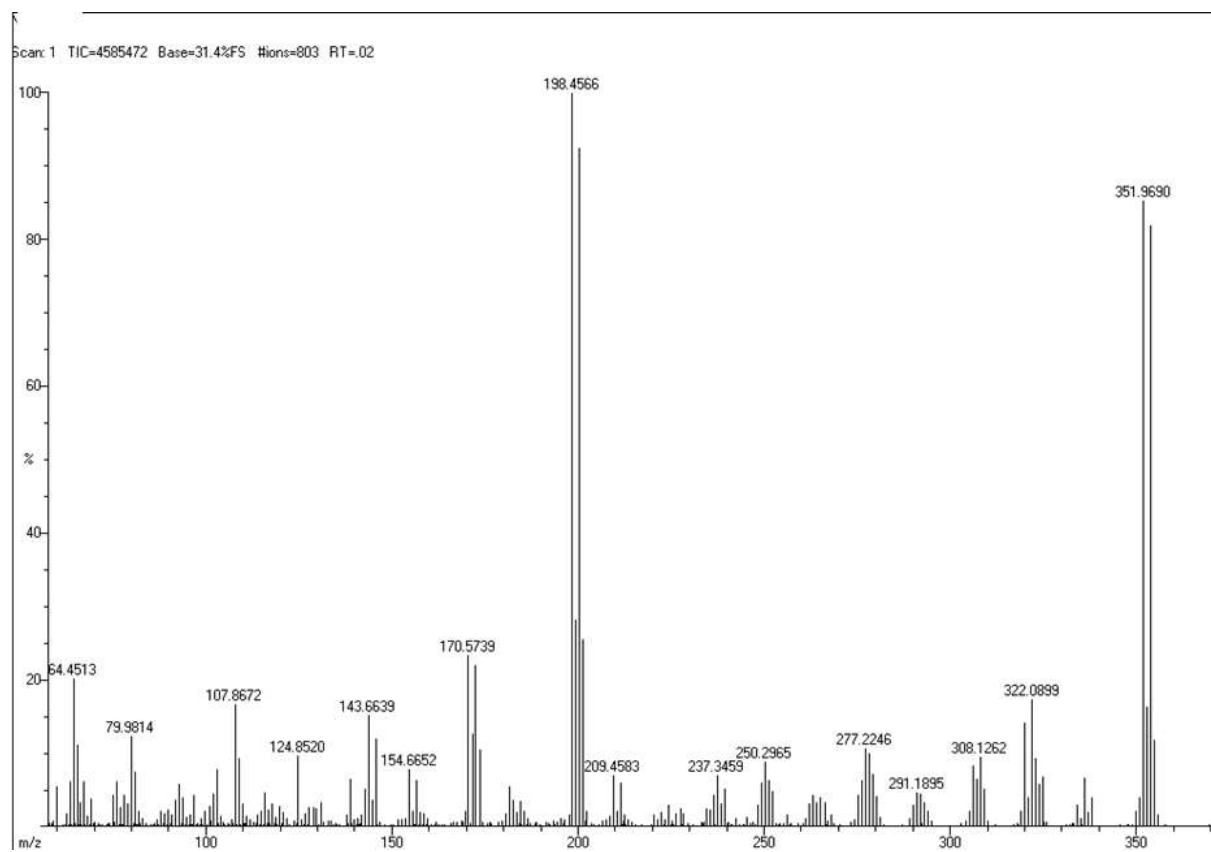

**EI-MS spectrum of compound 3c**

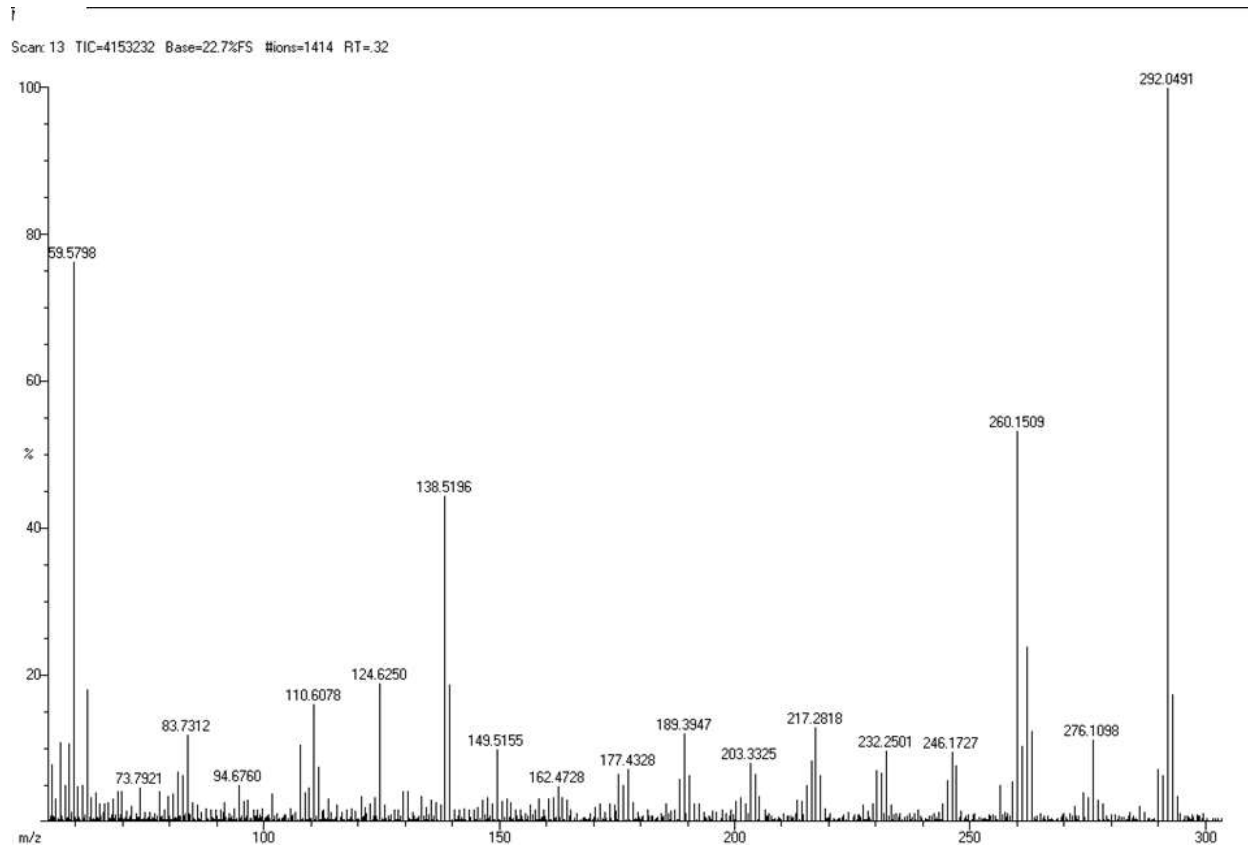

**EI-HRMS spectrum of compound 3d**

Scan: 2 TIC=4706656 Base=39.3%FS #Ions=1463 RT=.03

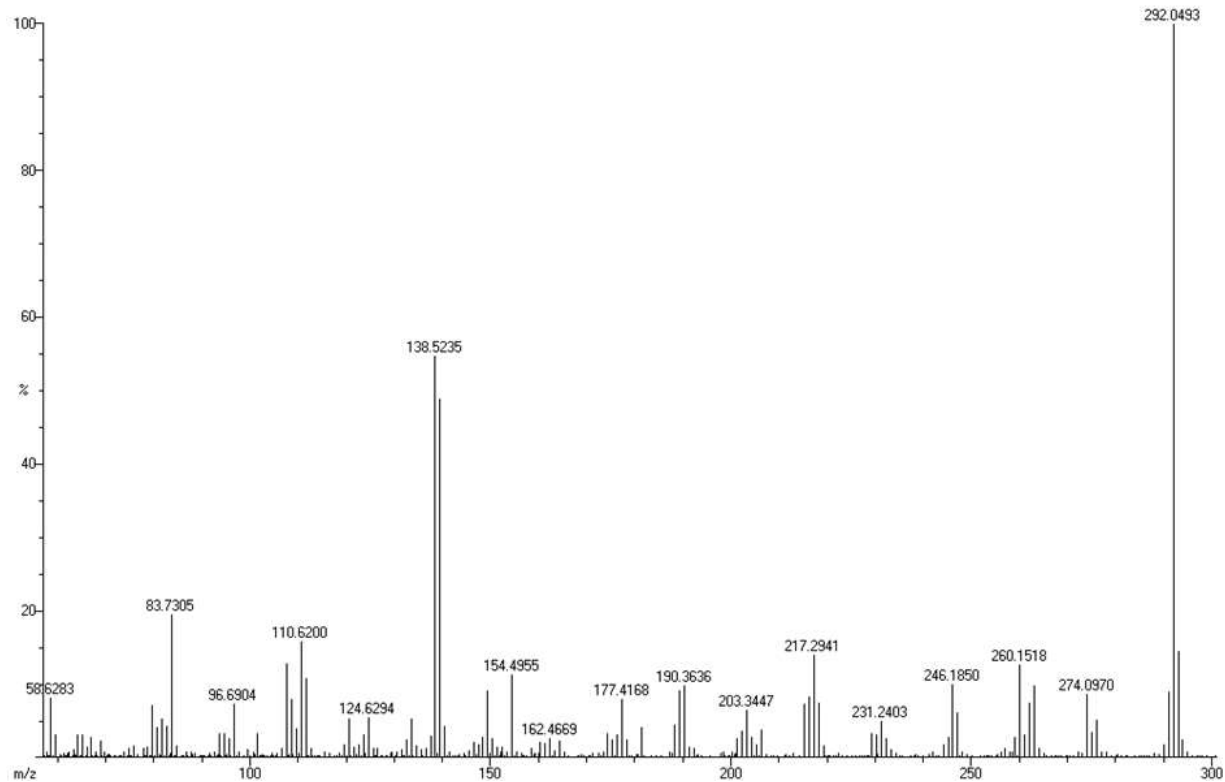

**EI-HRMS spectrum of compound 3e**

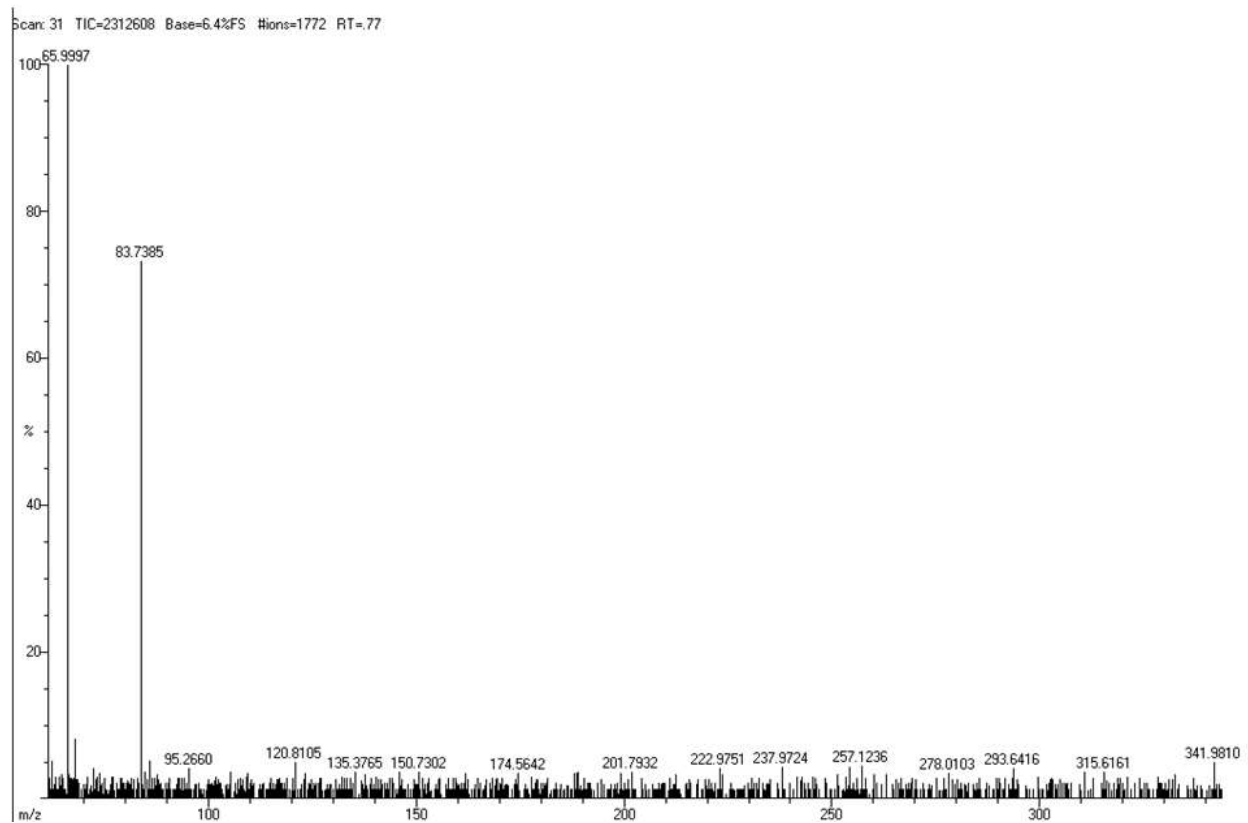

**EI-MS spectrum of compound 3f**

Scan 1 TIC=1098672 Base=6%FS #Ions=645 RT=.02

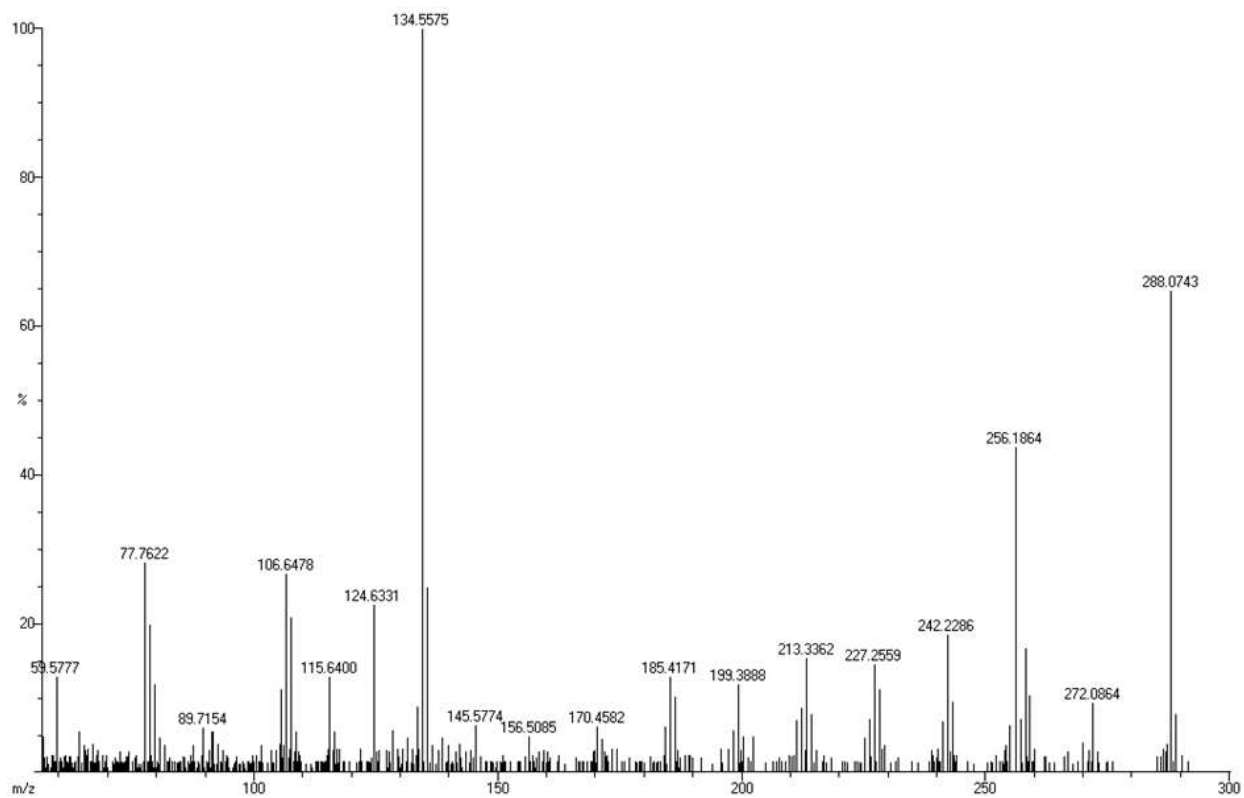

**EI-HRMS spectrum of compound 3g**

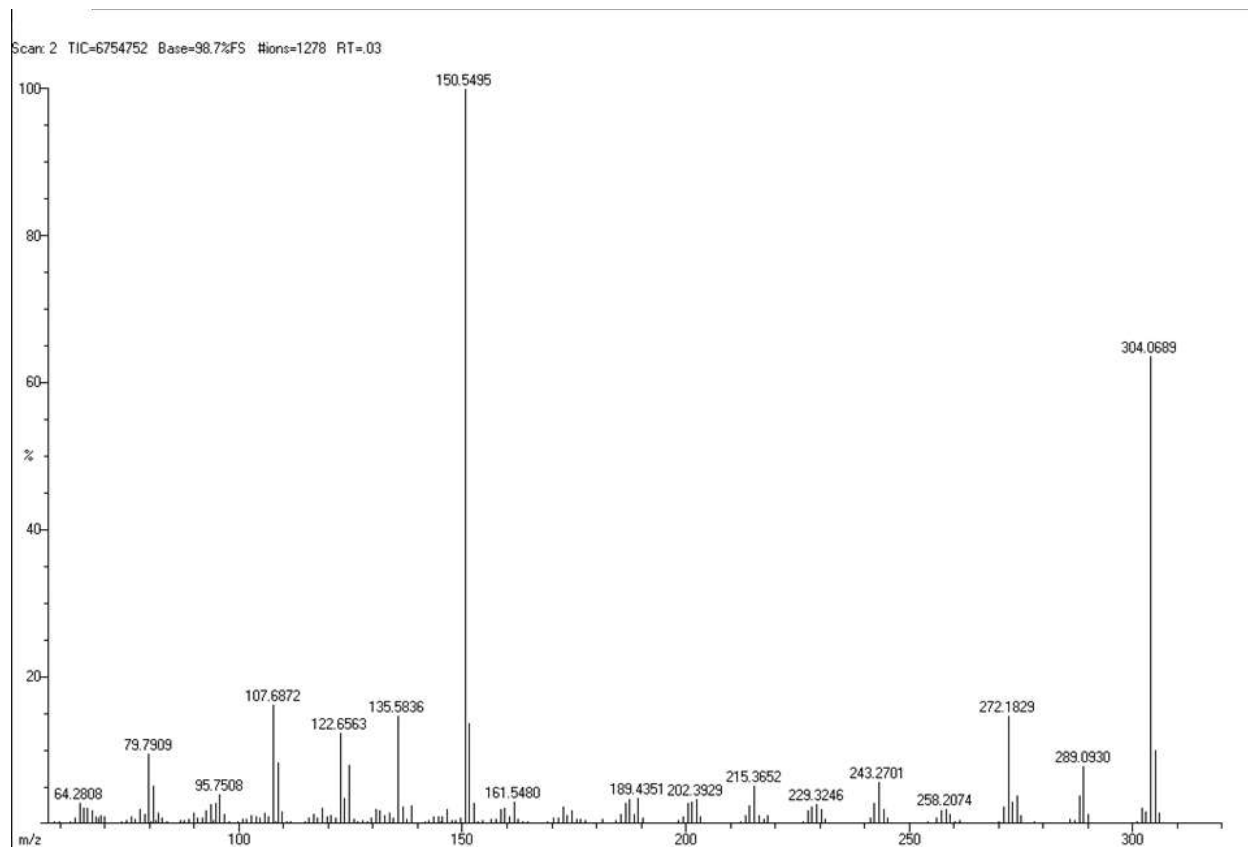

**EI-HRMS spectrum of compound 3h**



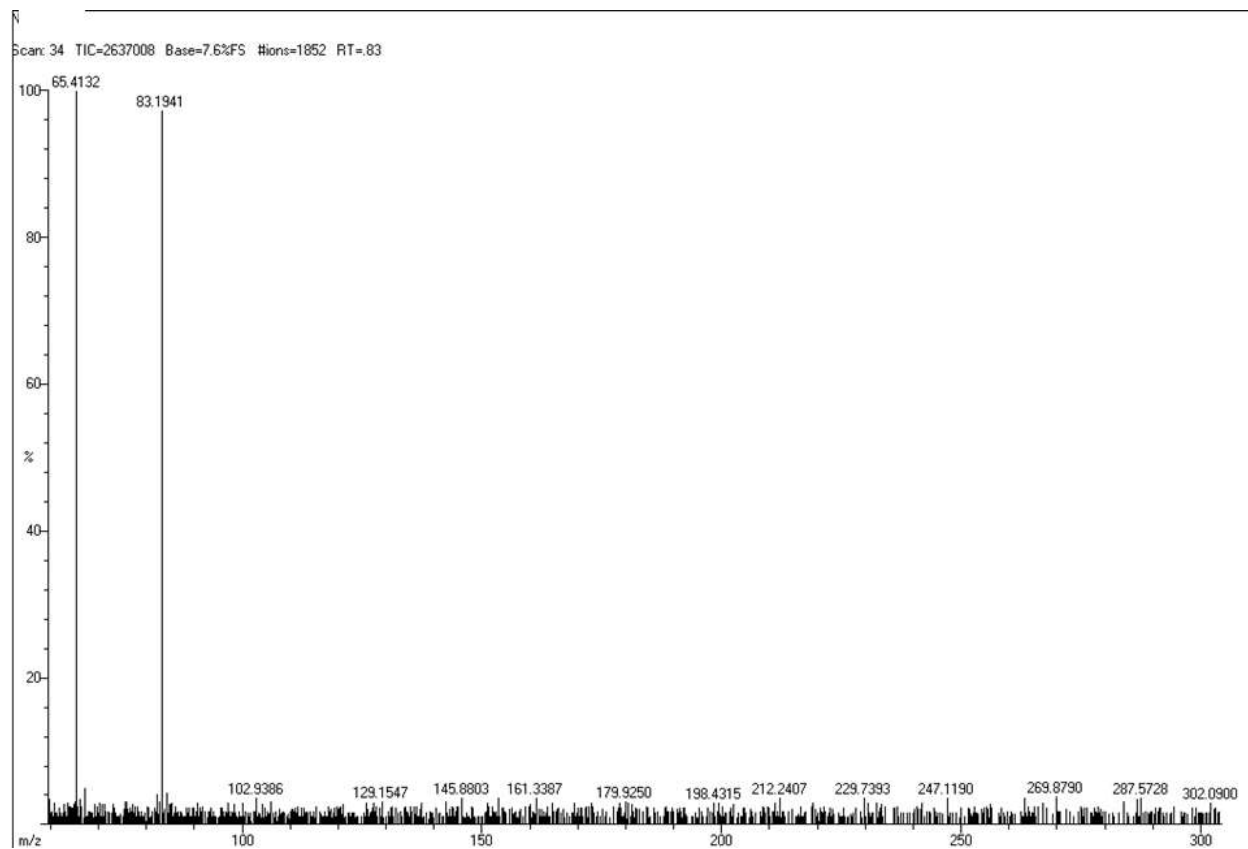

**EI-HRMS spectrum of compound 3i**

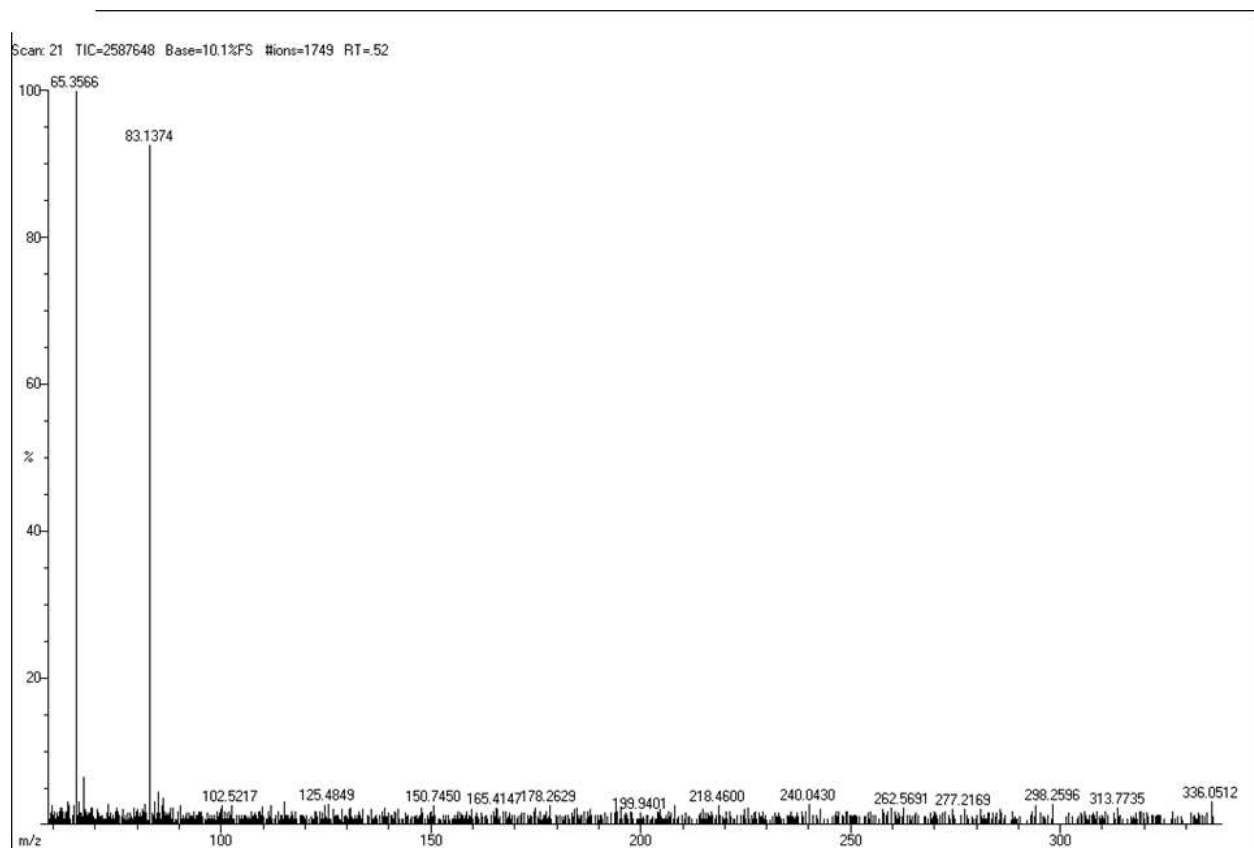

**EI-MS spectrum of compound 3j**

Scan: 22 TIC=3129824 Base=20.2%FS #Ions=1856 RT=.53

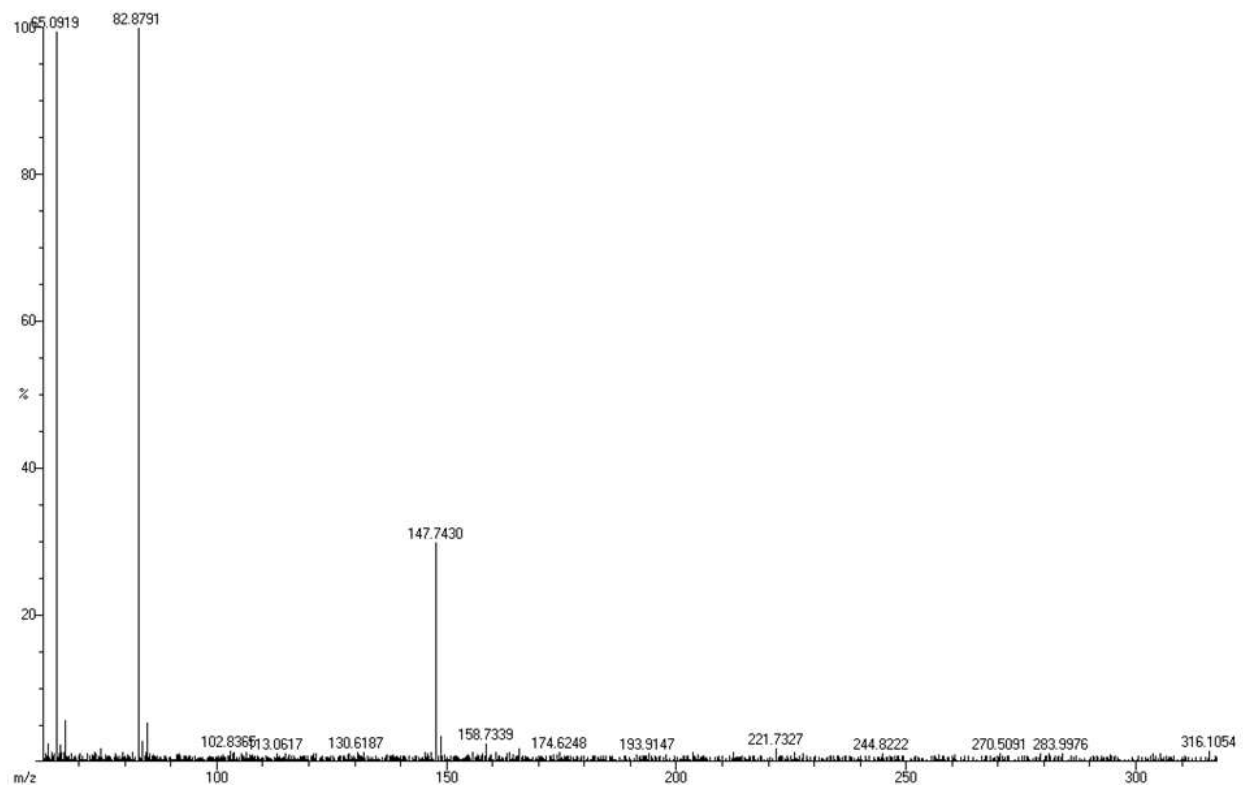

**EI-MS spectrum of compound 3k**

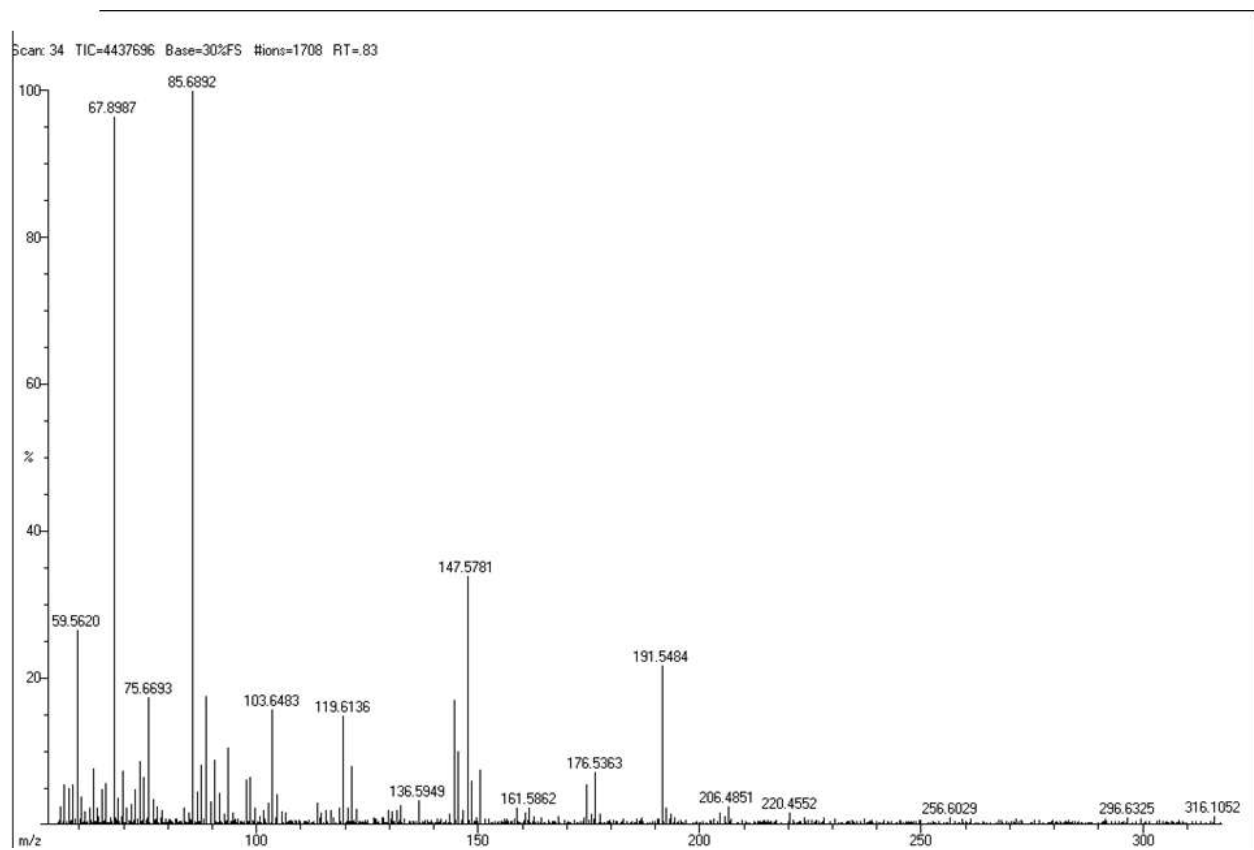

**EI-MS spectrum of compound 31**

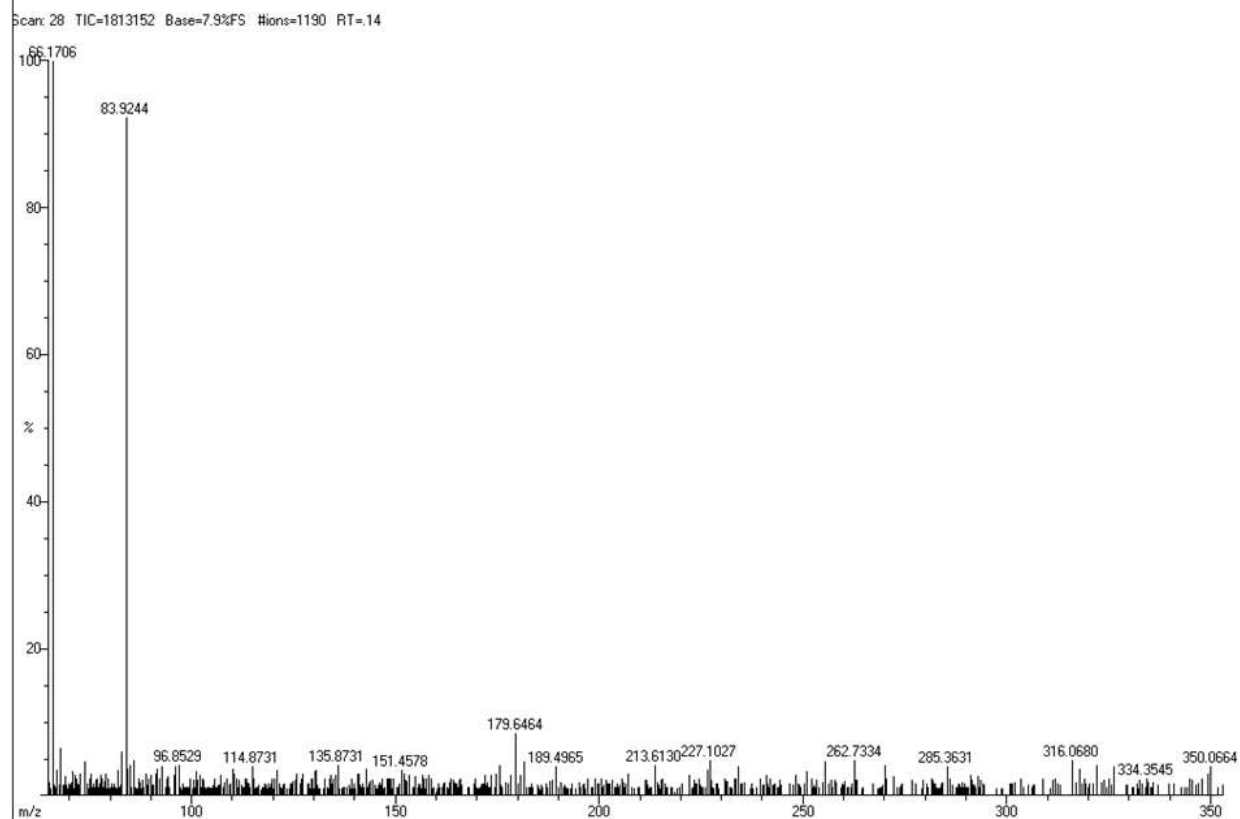

**EI-MS spectrum of compound 3m**

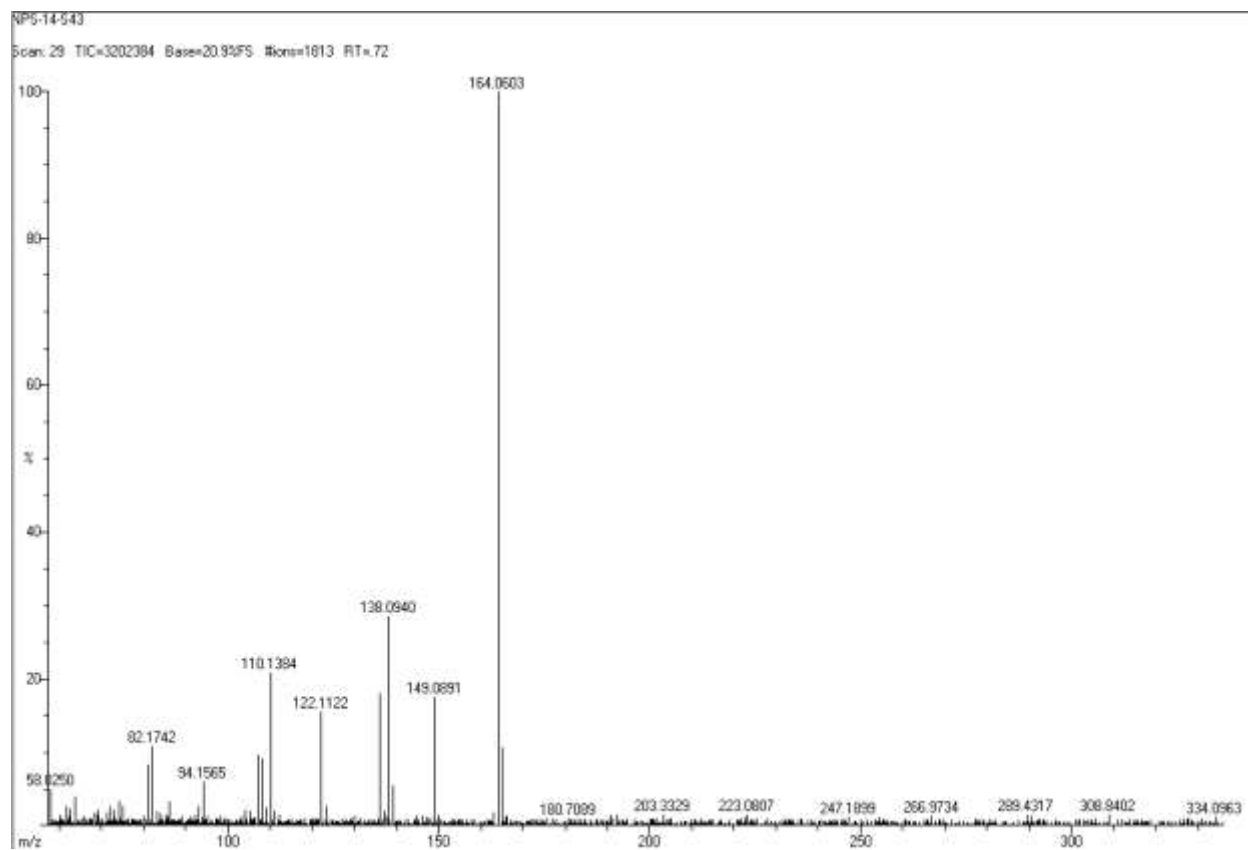

**EI-MS spectrum of compound 3n**

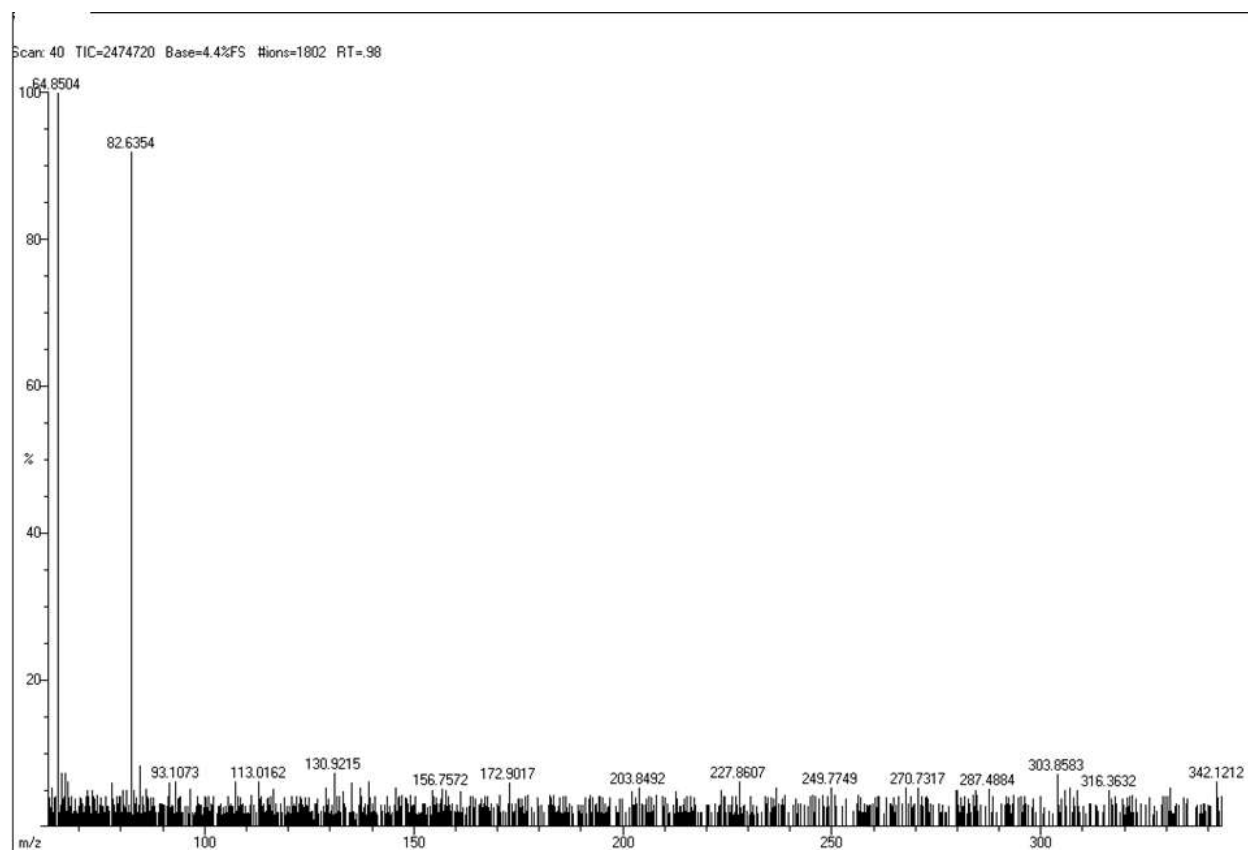

**EI-MS spectrum of compound 3o**

Scan: 32 TIC=2993392 Base=12.2%FS #Ions=1842 RT=.78

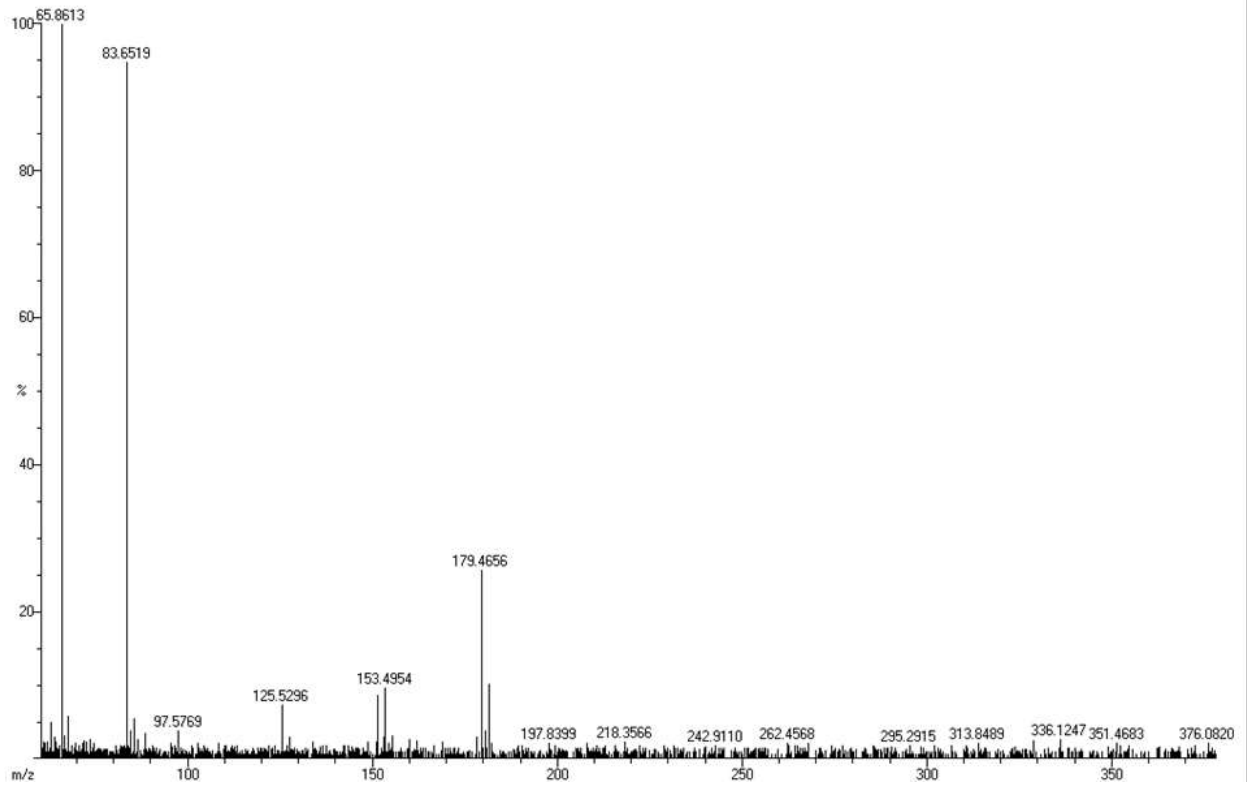

**EI-HRMS spectrum of compound 3p**



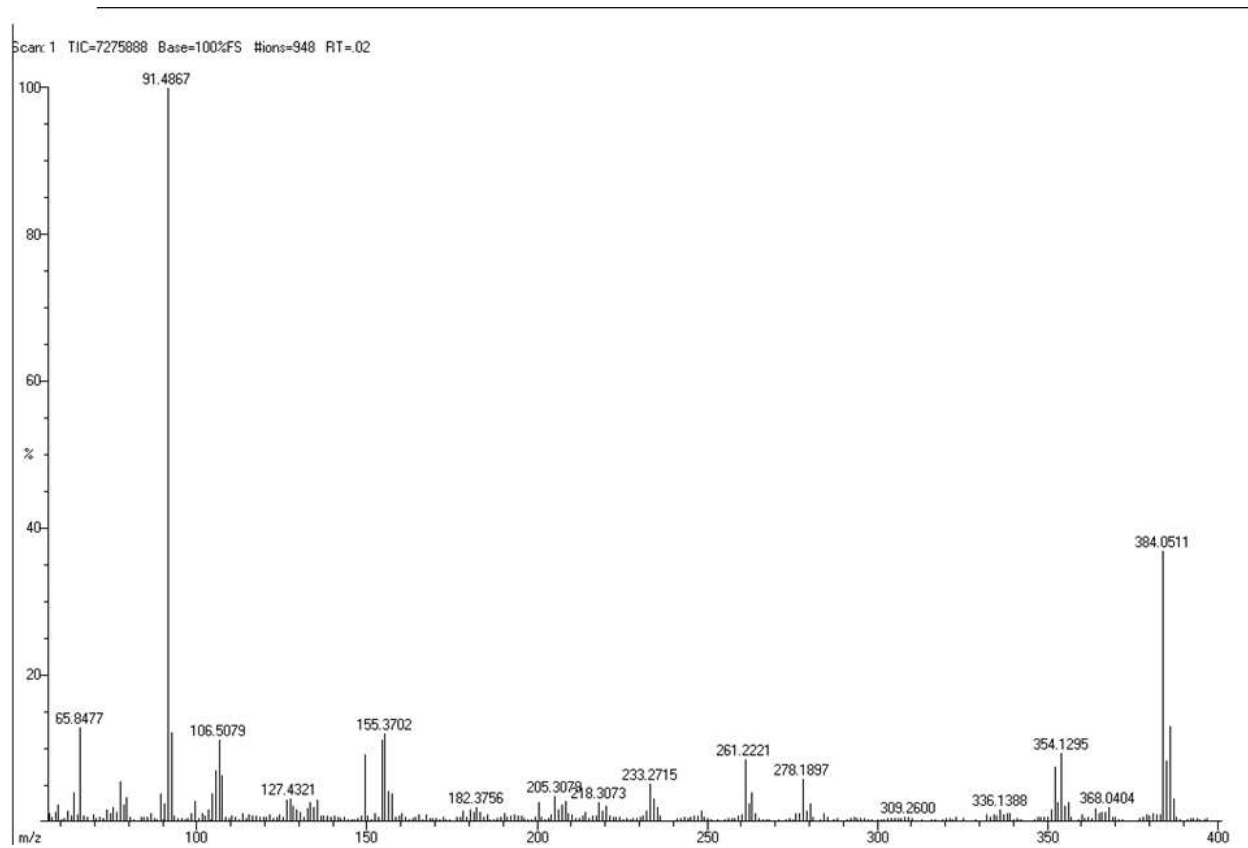

**EI-HRMS spectrum of compound 3q**

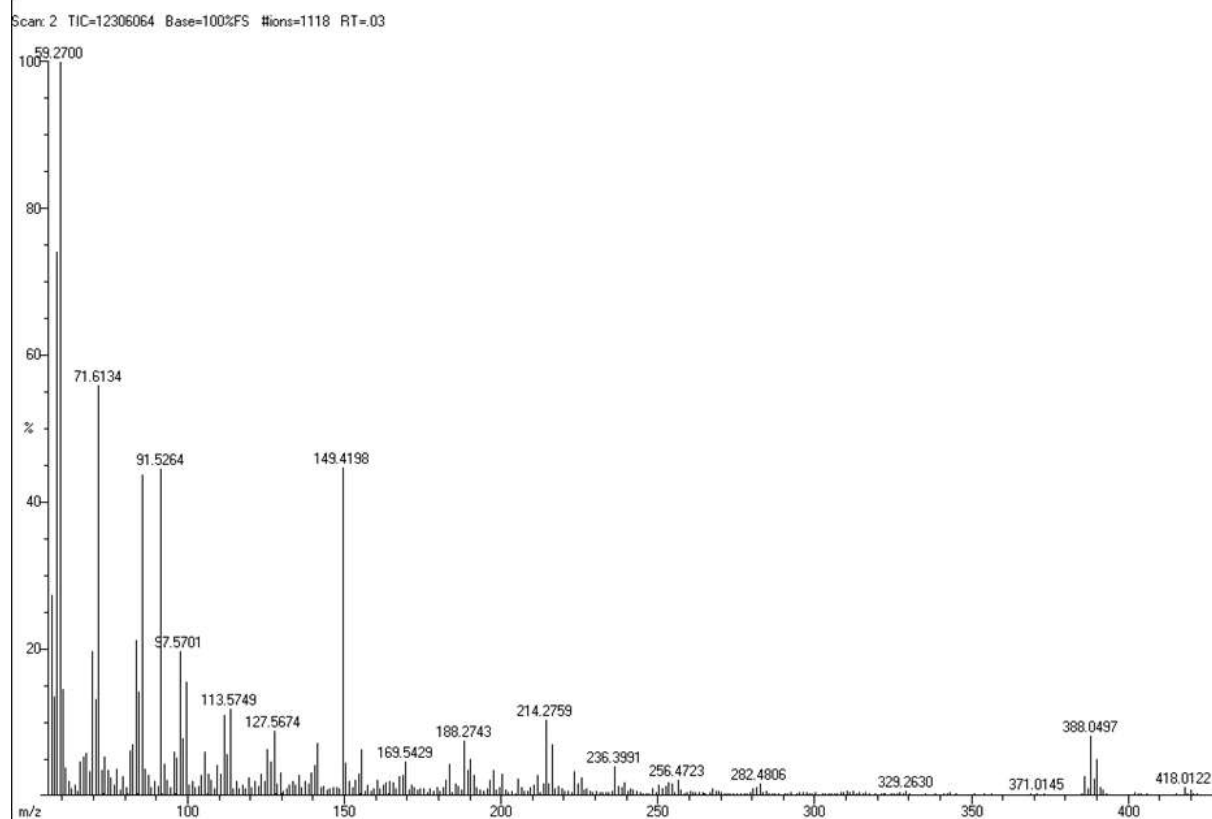

**EI-MS spectrum of compound 3r**

Scan: 1 TIC=6350400 Base=85.4%FS #Ions=807 RT=.02

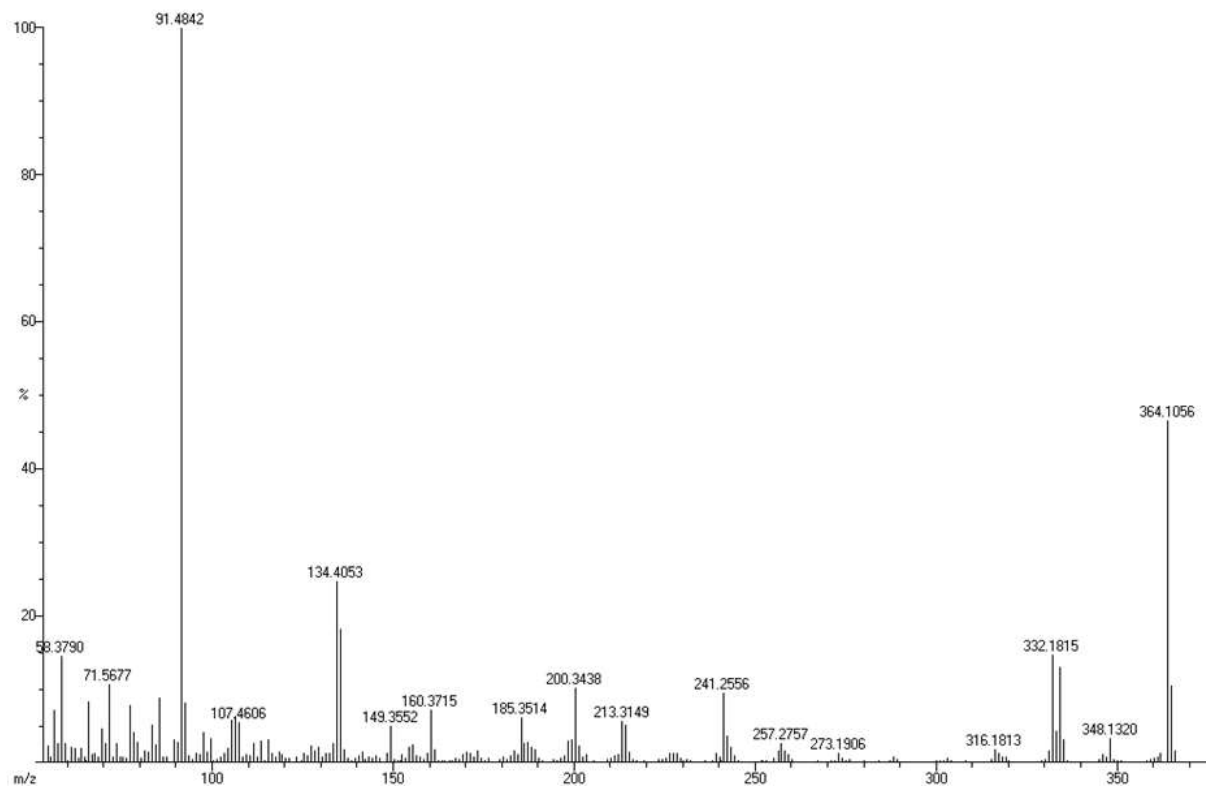

**EI-HRMS spectrum of compound 3s**

Scan: 1 TIC=1853312 Base=11.6%FS #Ions=685 RT=.02

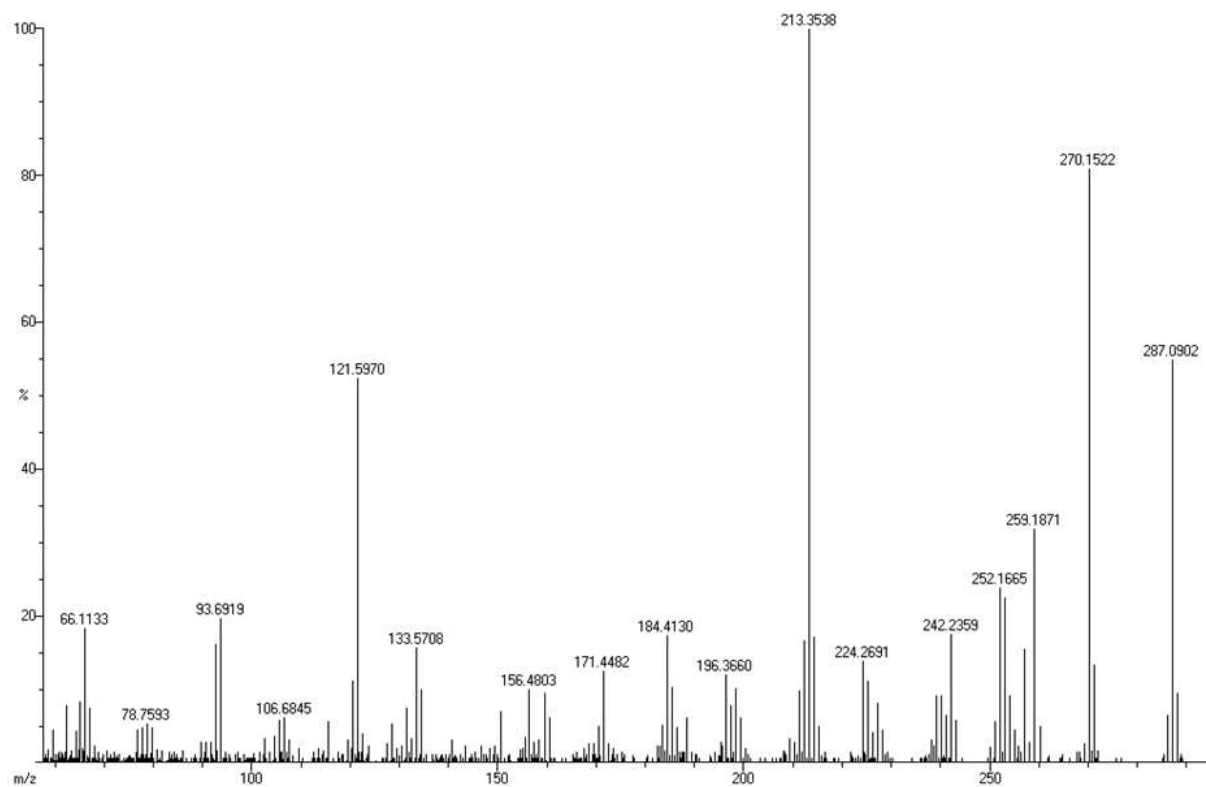

**EI-HRMS spectrum of compound 5a**

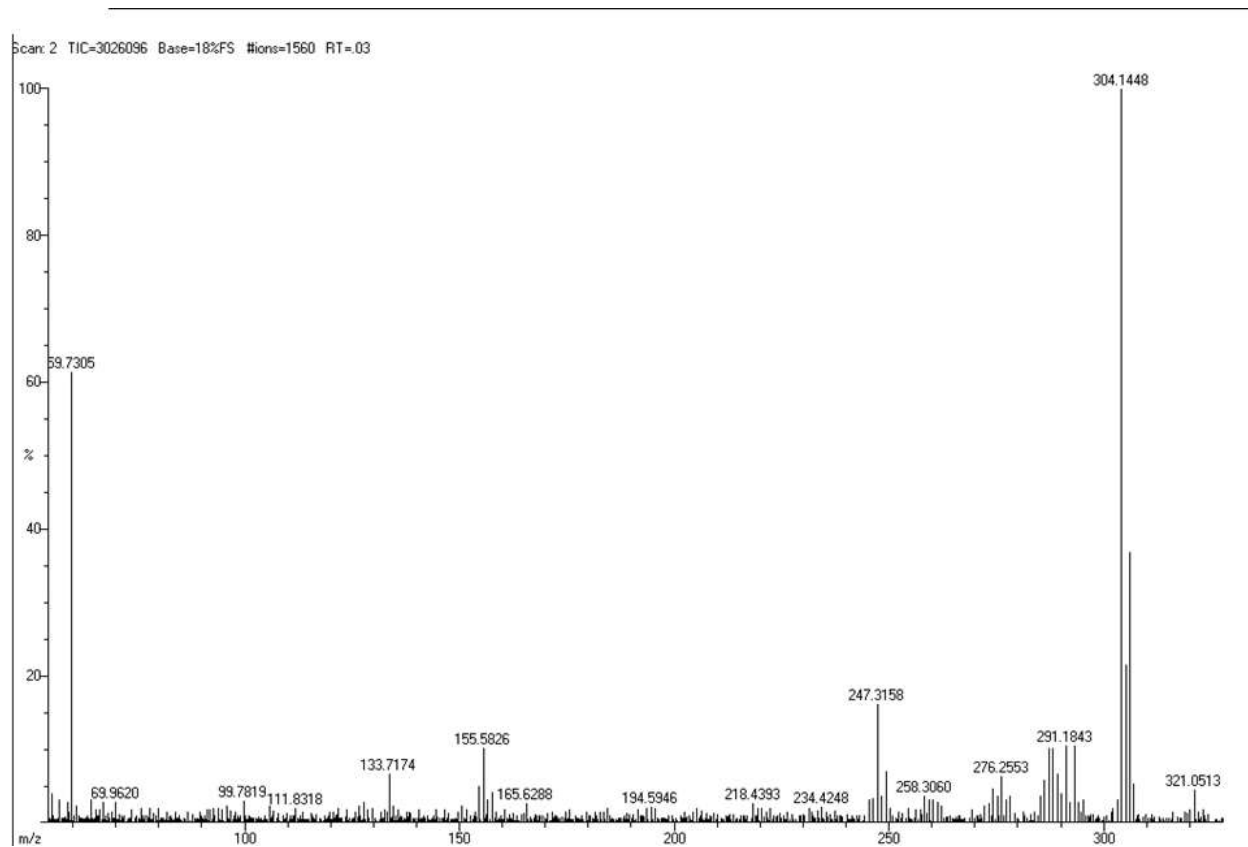

**EI-HRMS spectrum of compound 5b**

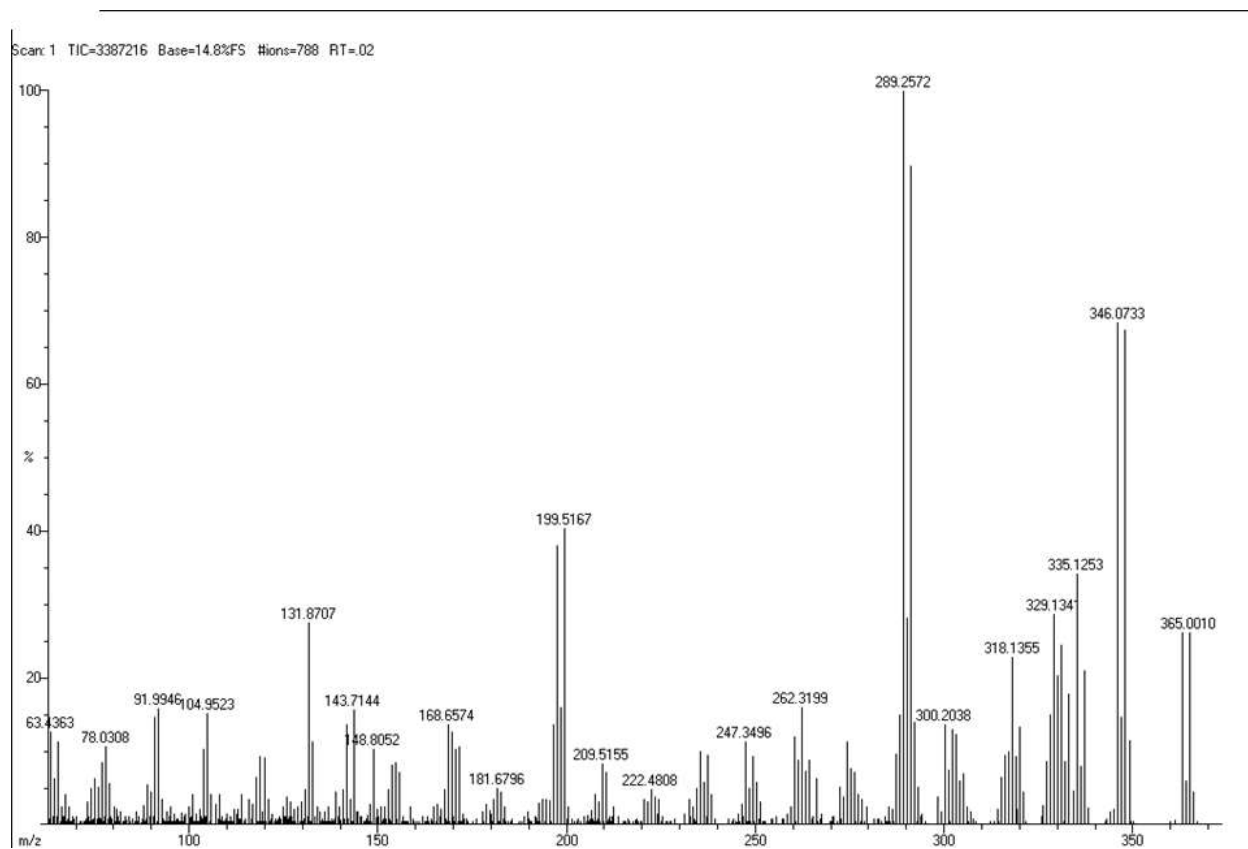

**EI-HRMS spectrum of compound 5c**

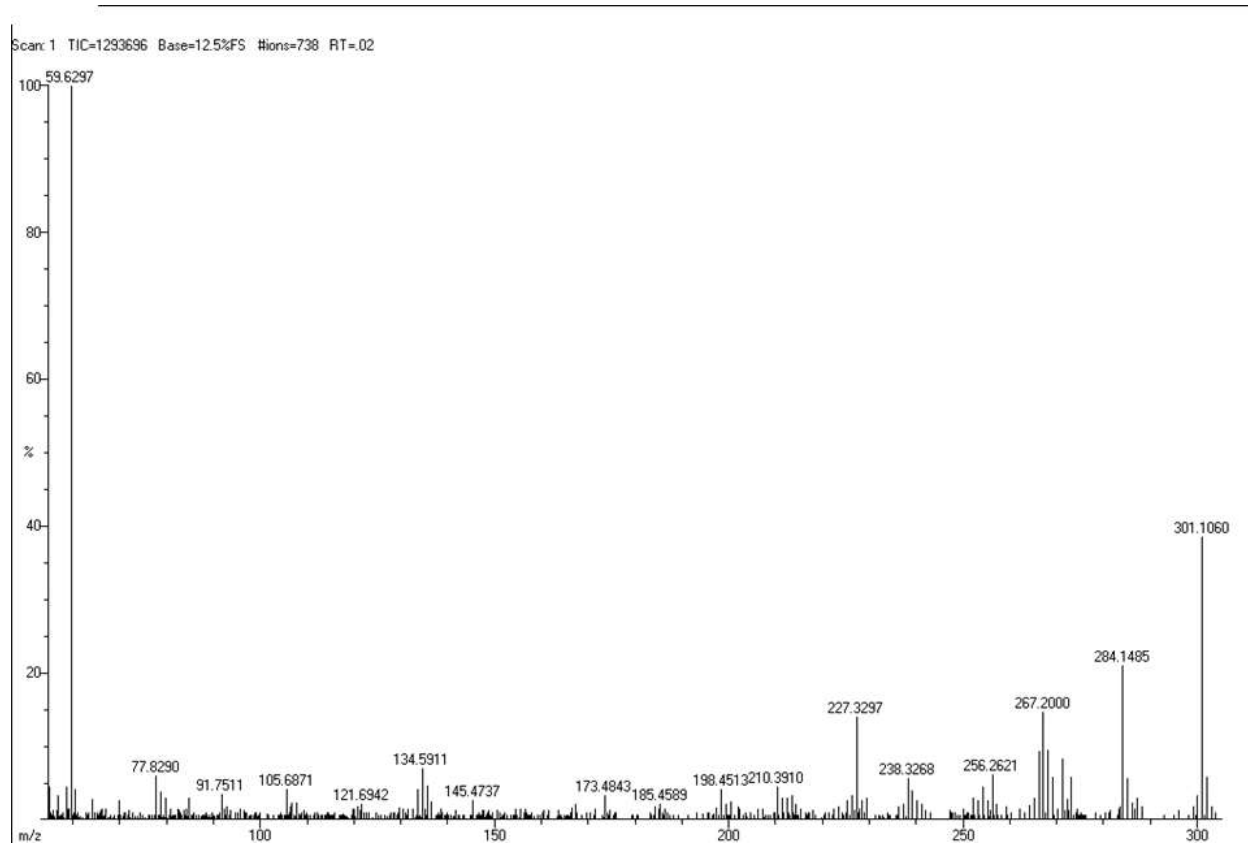

**EI-HRMS spectrum of compound 5d**

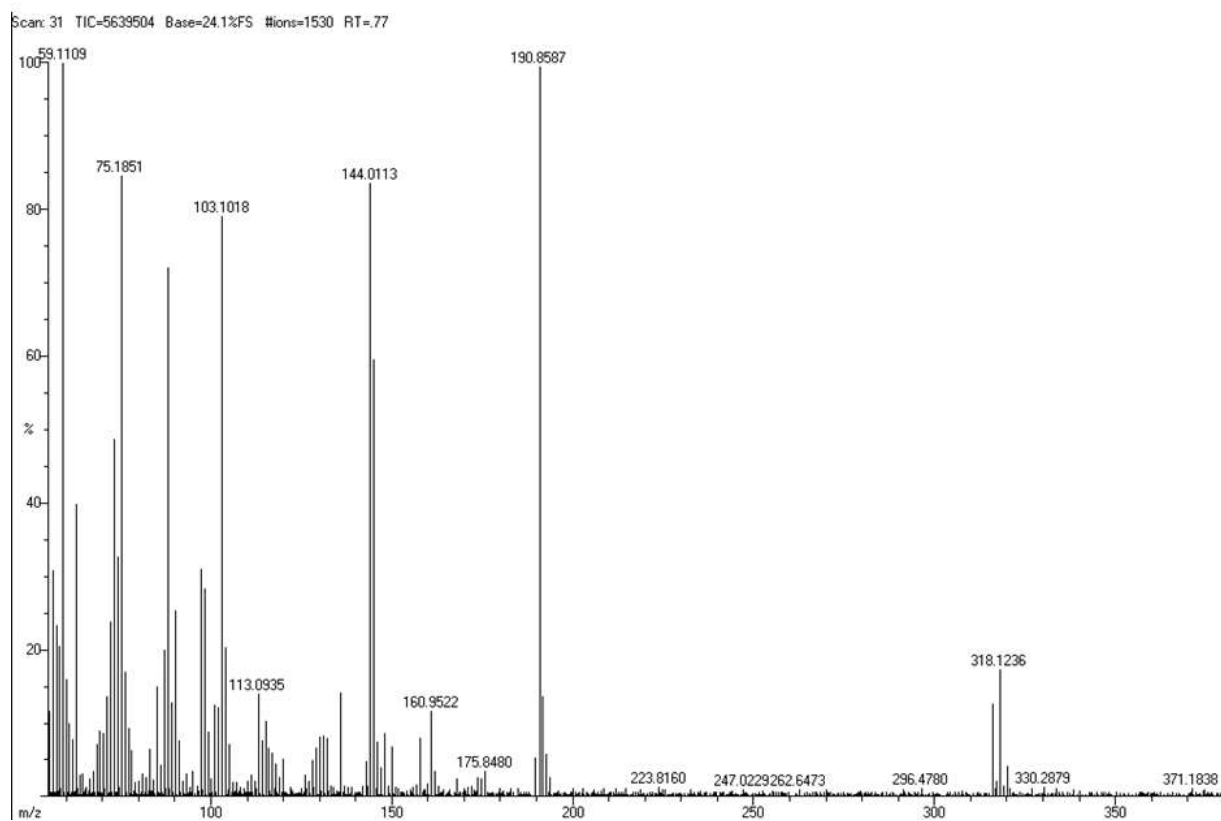

**EI-MS spectrum of compound 5e**



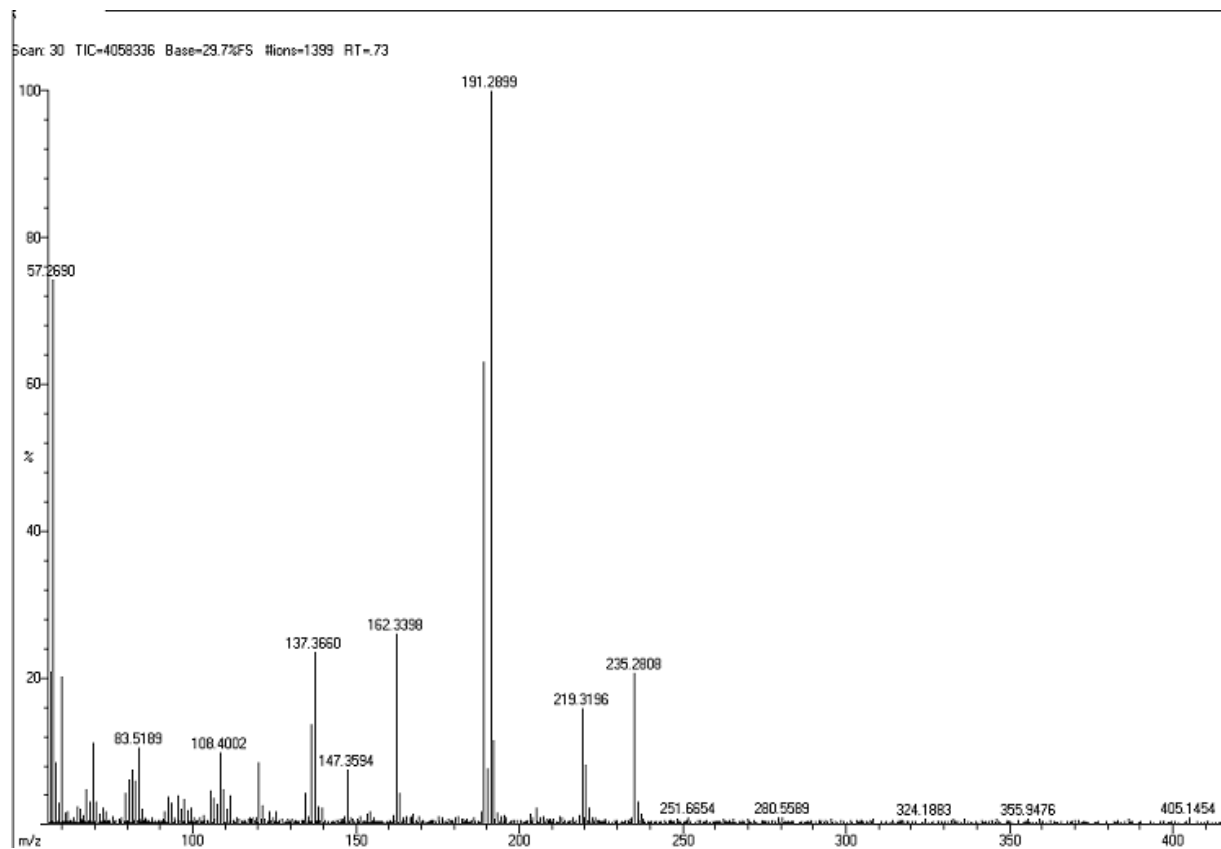

**EI-HRMS spectrum of compound 5f**

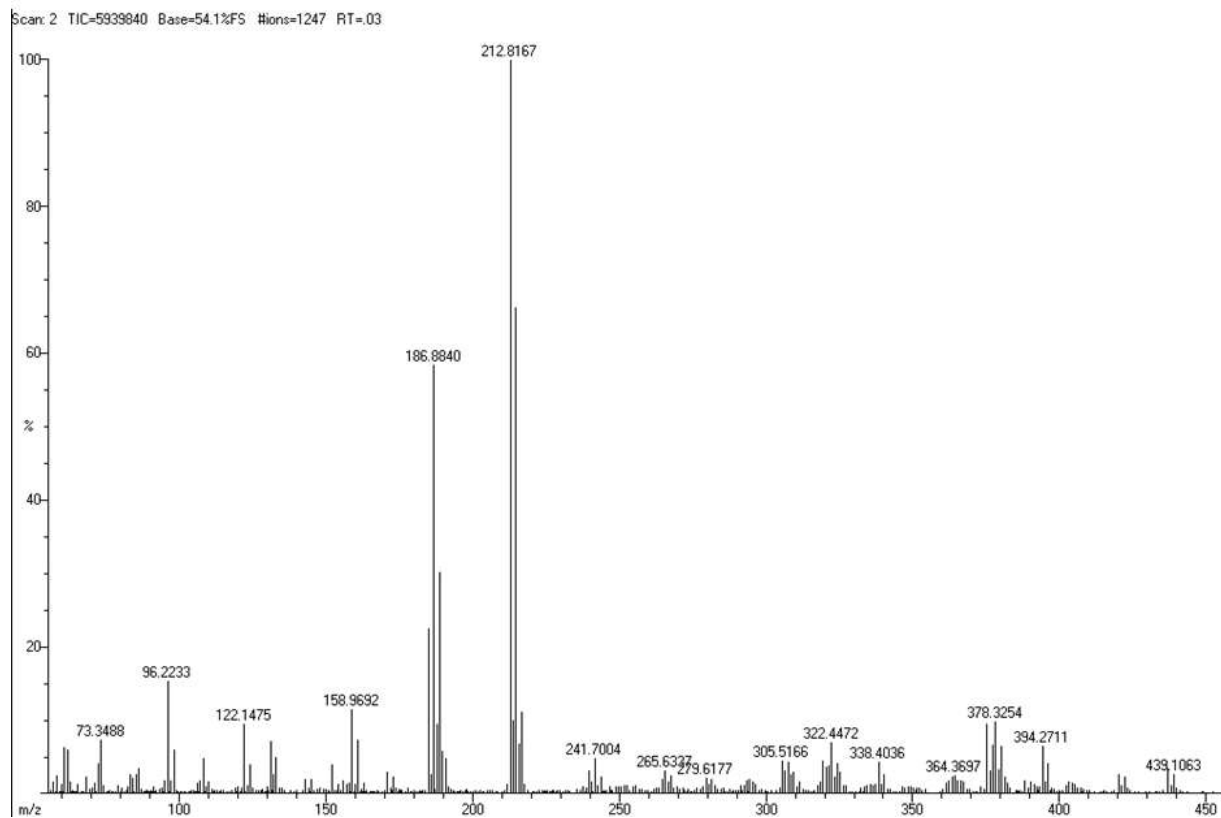

**EI-HRMS spectrum of compound 5g**

Scan: 1 TIC=23452064 Base=100%FS #Ions=808 RT=.02

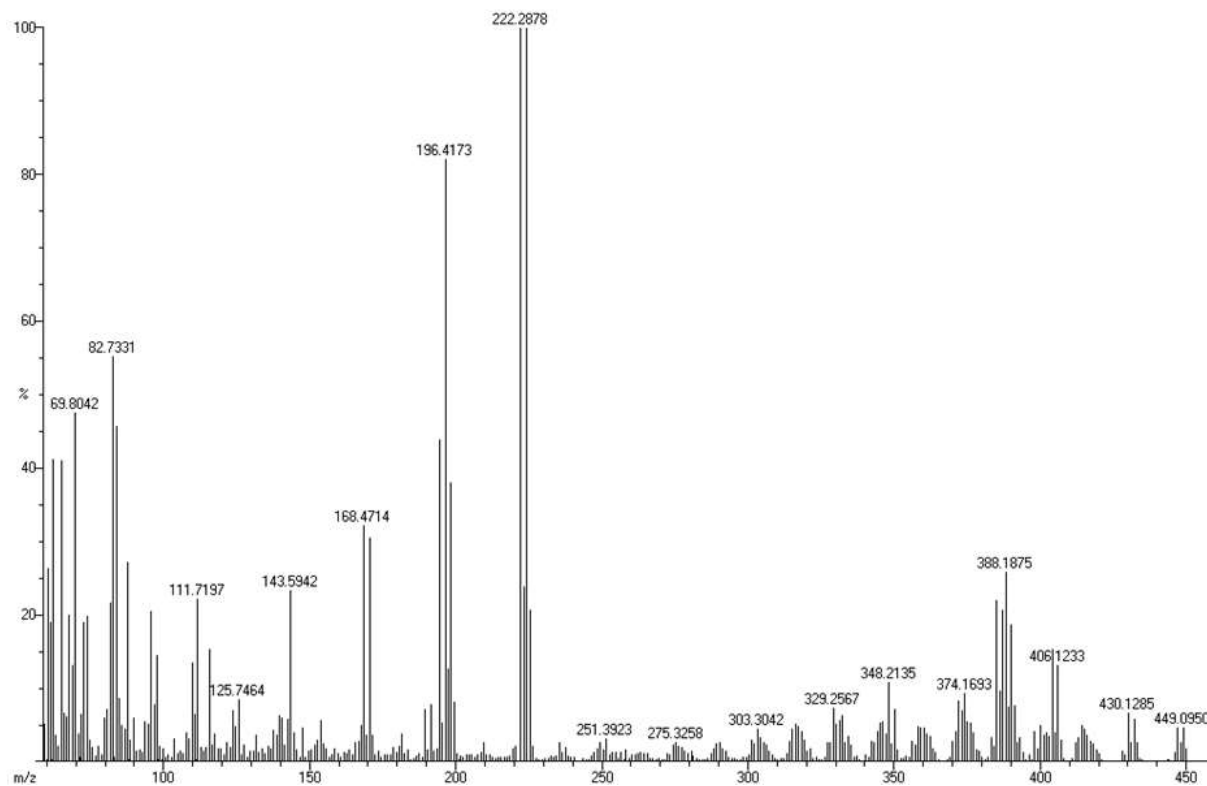

**EI-HRMS spectrum of compound 5h**

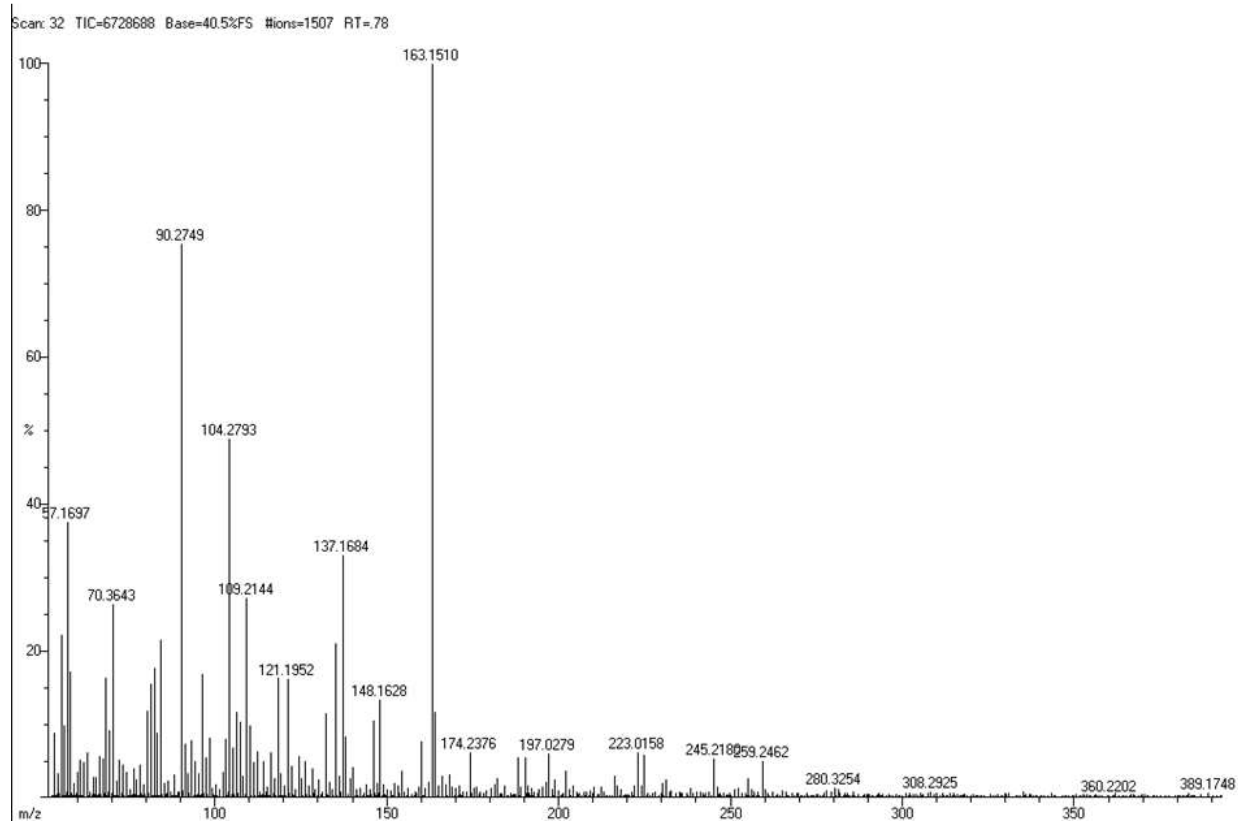

**EI-MS spectrum of compound 5i**

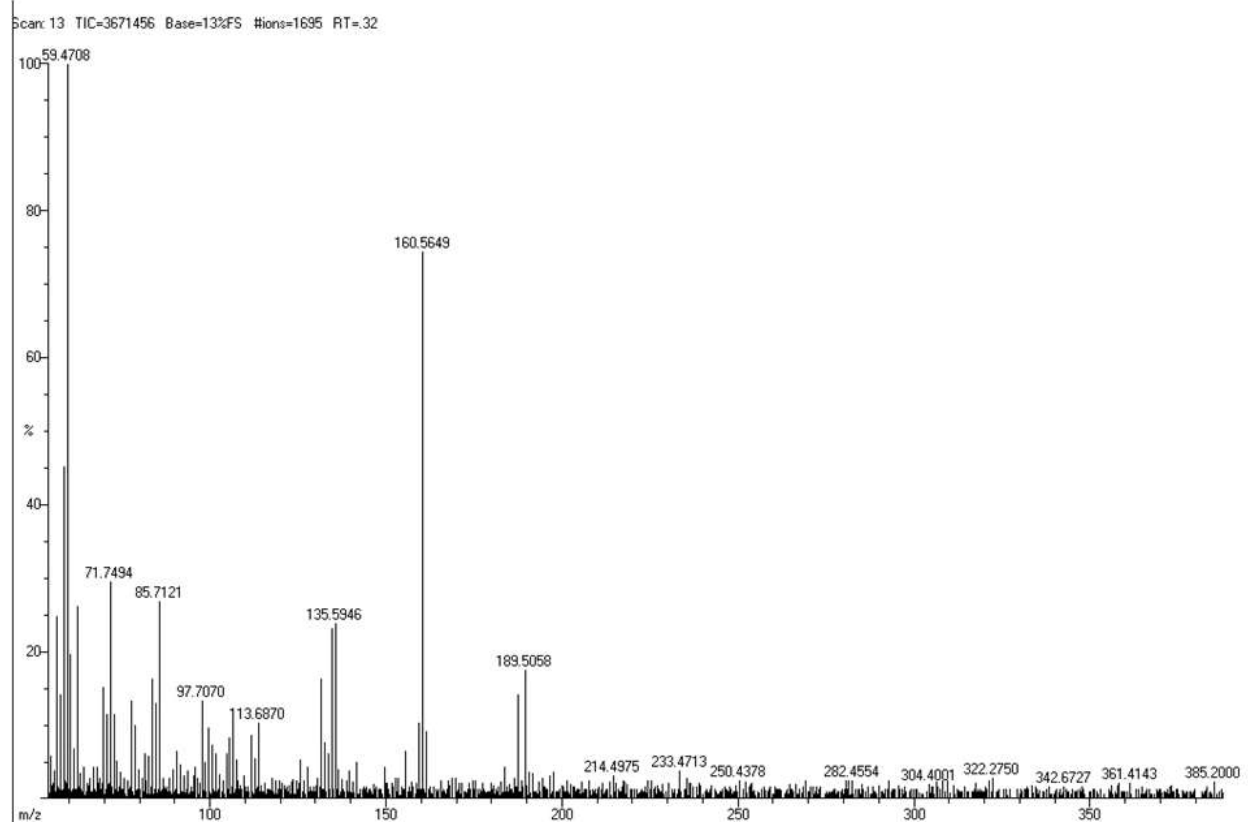

**EI-MS spectrum of compound 5j**

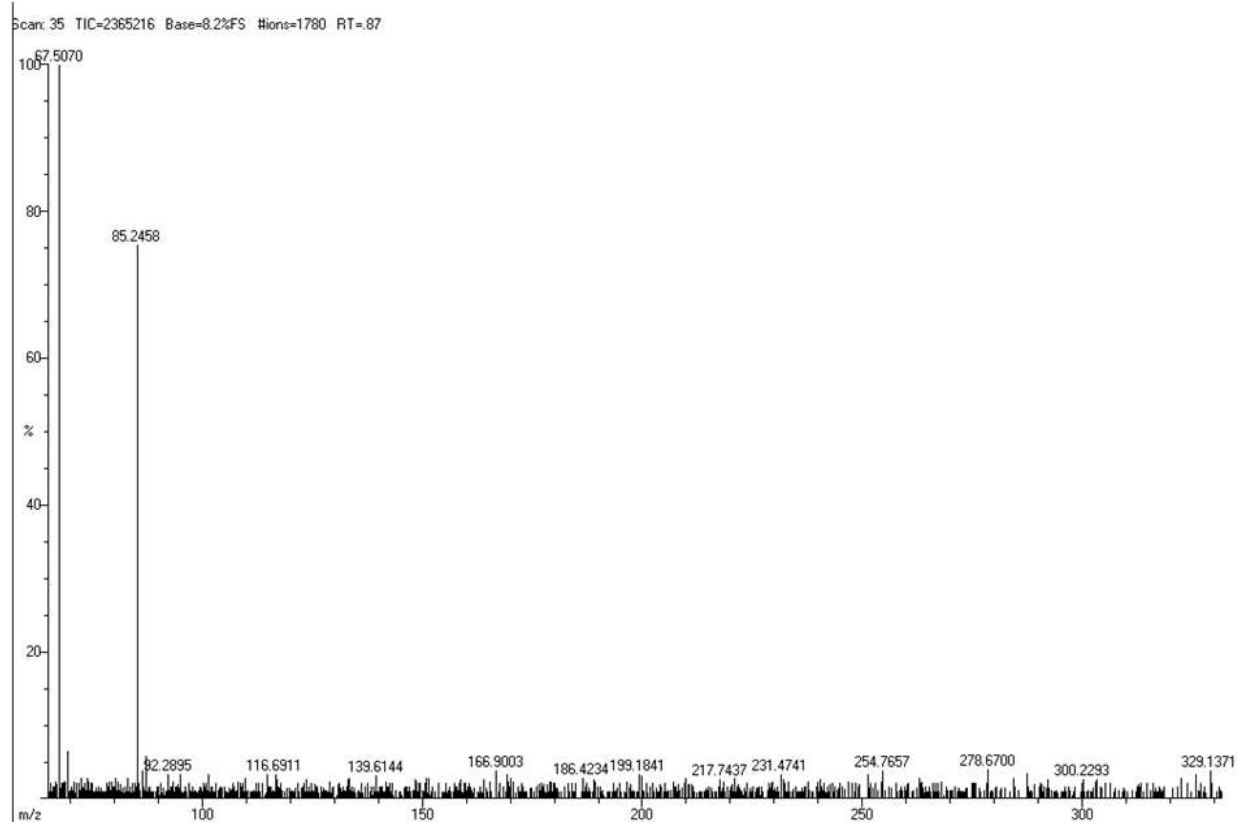

**EI-MS spectrum of compound 5k**

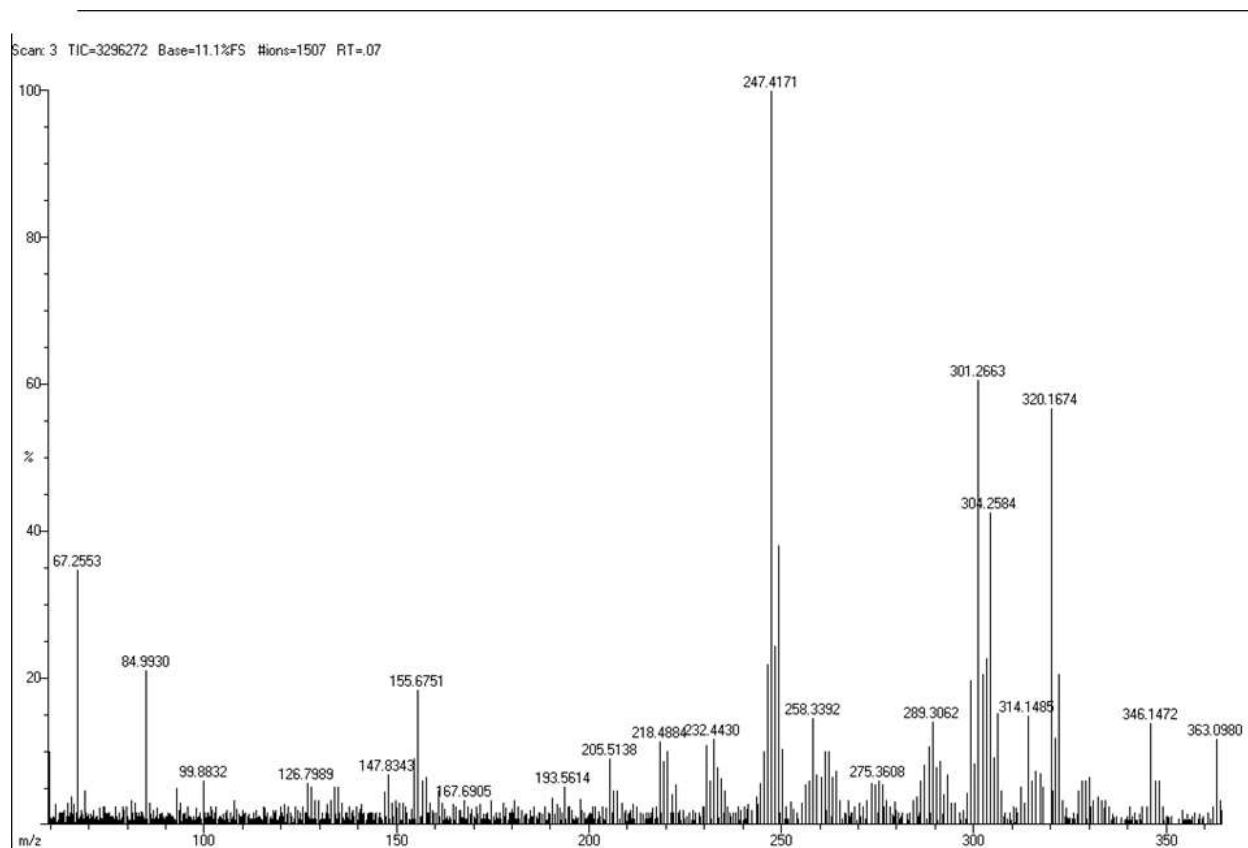

**EI-HRMS spectrum of compound 51**

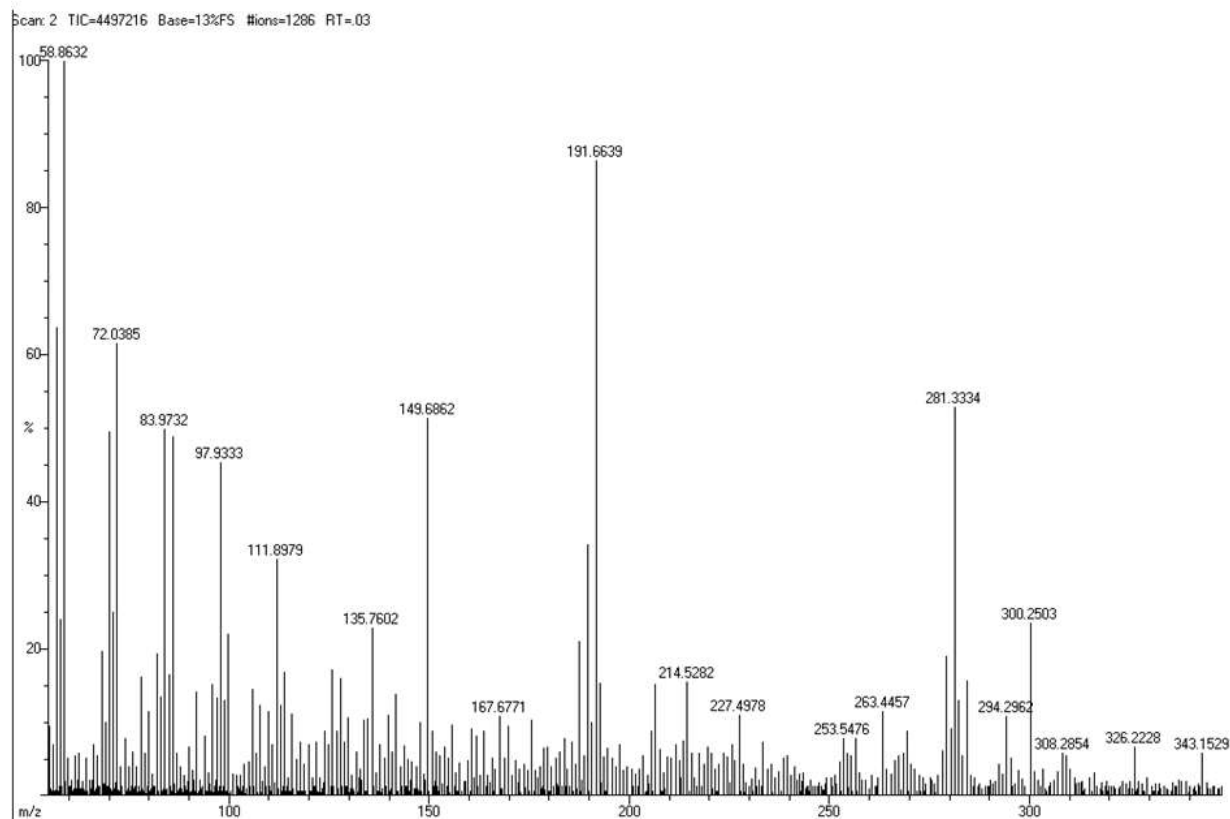

**EI-MS spectrum of compound 5m**



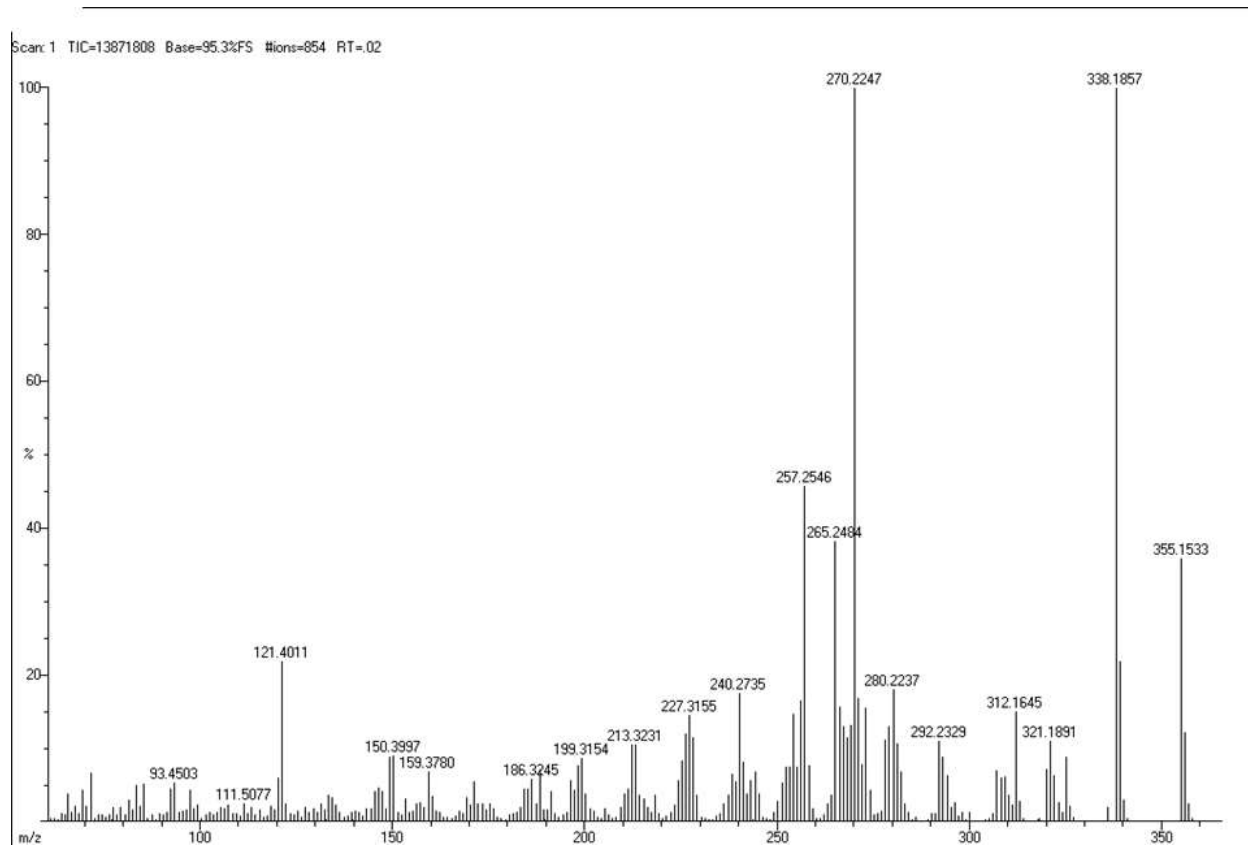

**EI-HRMS spectrum of compound 5n**

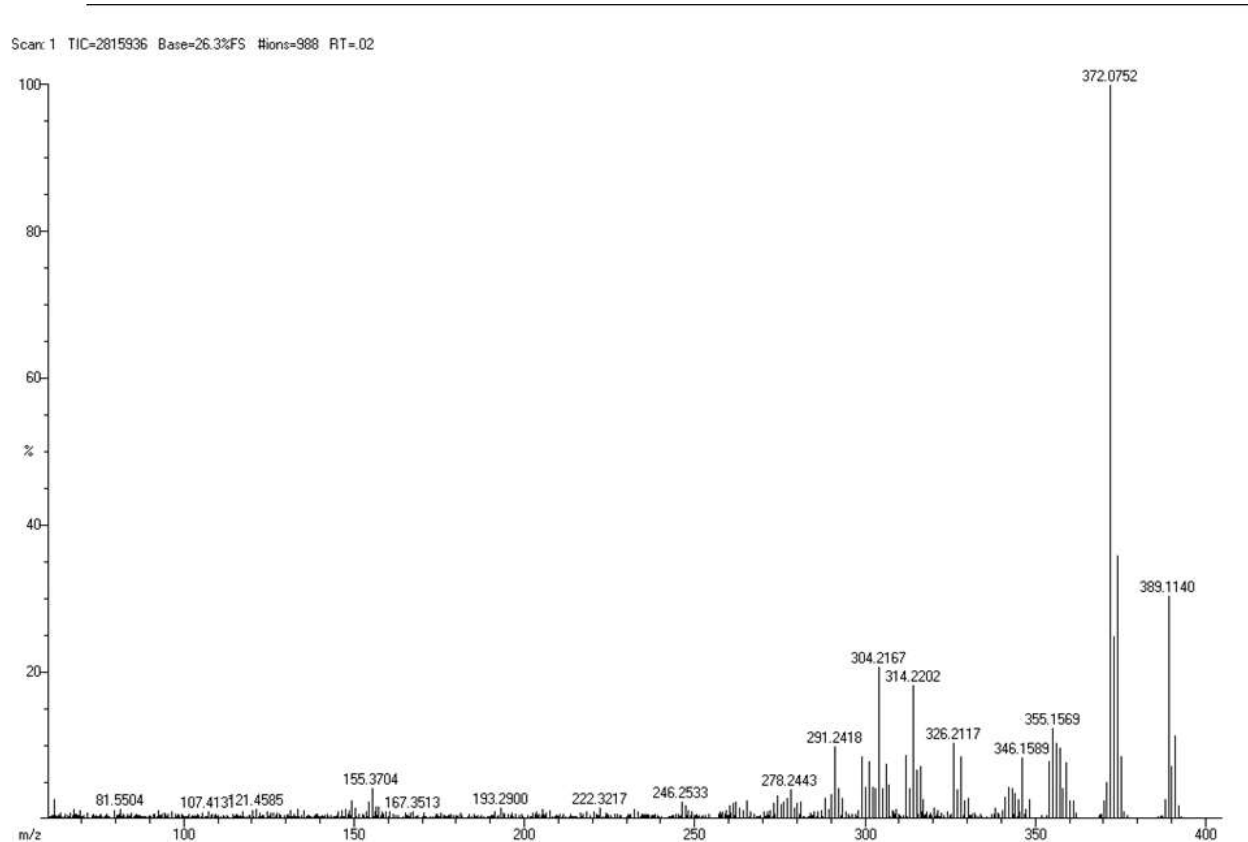

**EI-MS spectrum of compound 5o**

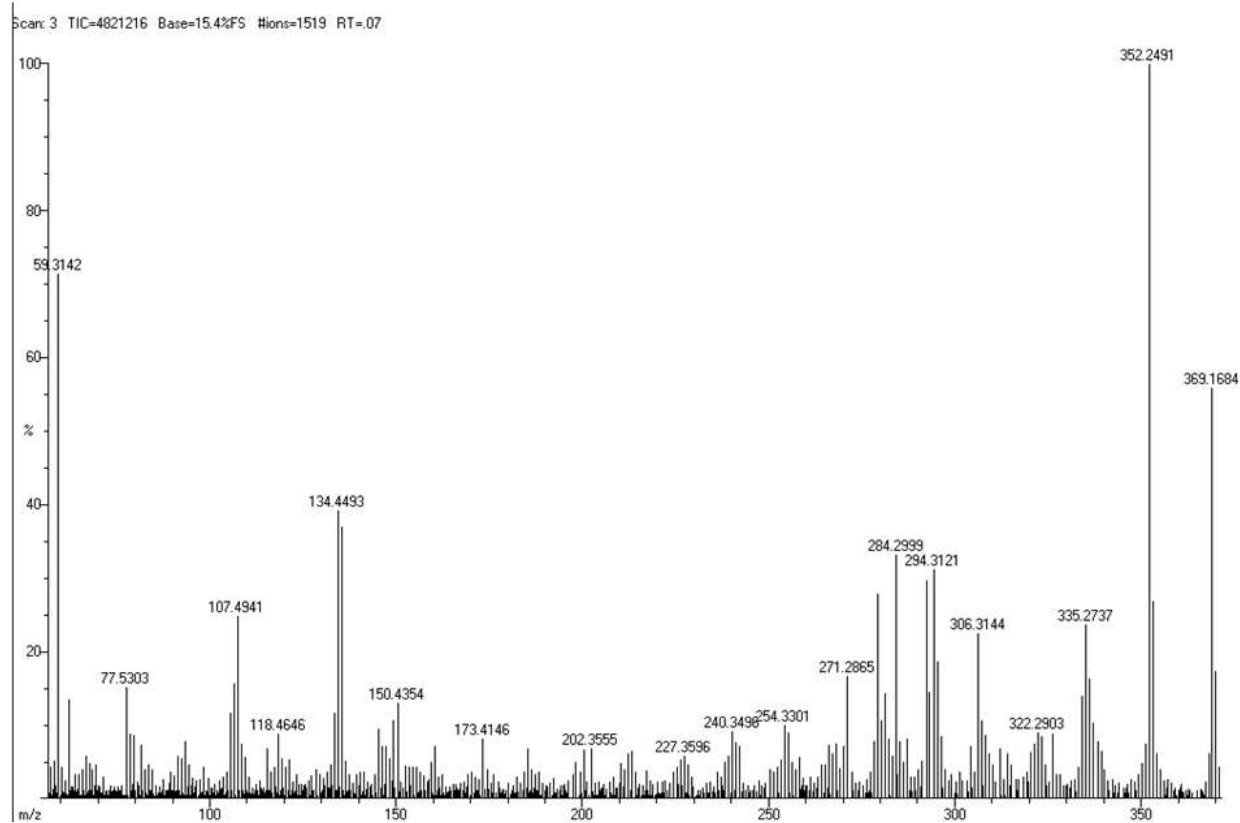

**EI-MS spectrum of compound 5p**

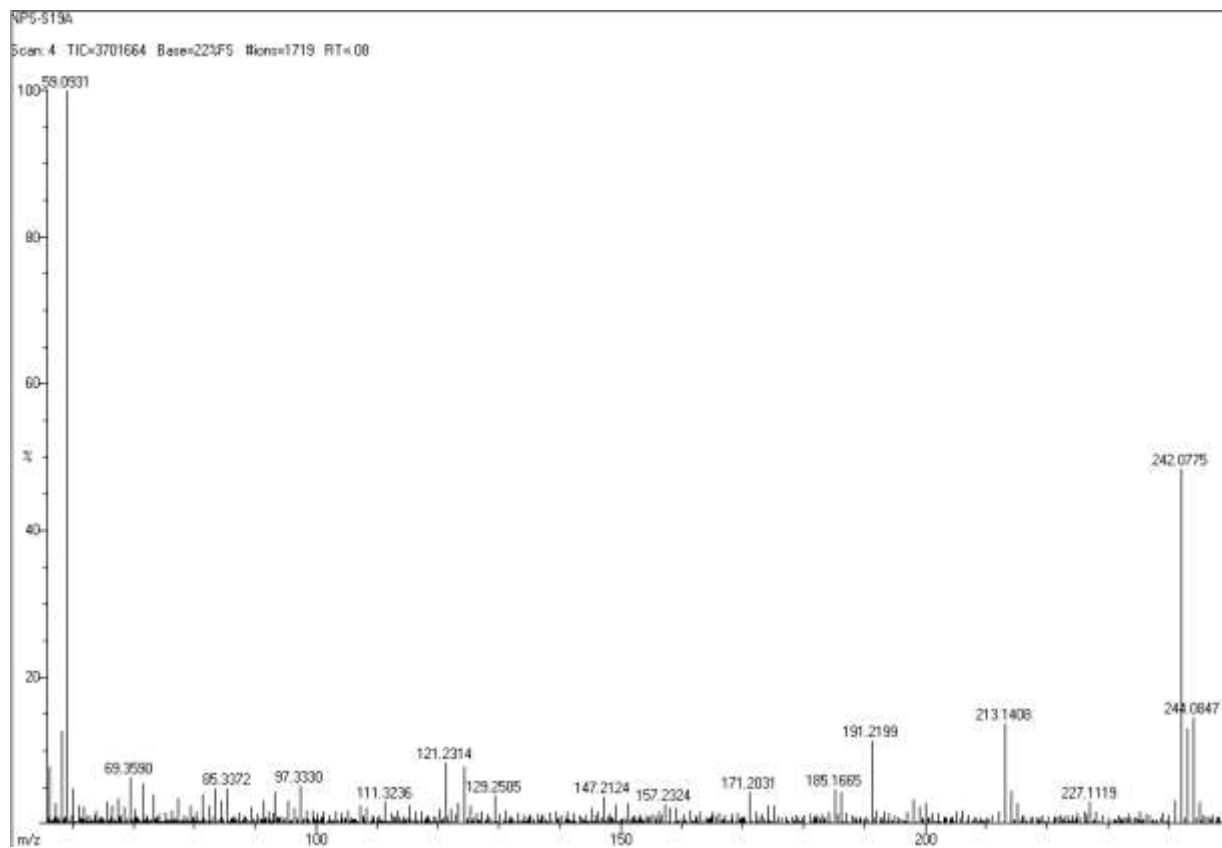

**EI-MS spectrum of compound 14**
